# Supplementary material for: Deletion of the SELENOP gene leads to CNS atrophy with cerebellar ataxia in dogs
Source: PLoS Genet. 2021 Aug 2;17(8):e1009716. doi: 10.1371/journal.pgen.1009716 (PMC8360551; doi:10.1371/journal.pgen.1009716)
Supplement: S1 Table — (XLSX) [file pgen.1009716.s003.xlsx]

## Sheet: Combined linkage & homozygosity
S1 Table. Critical interval derived by intersecting the results from linkage analysis and homozygosity mapping. Coordinates refer to the CanFam 3.1 assembly.
Chromosome	Start	Stop	Size (bp)	SNP Start	SNP Stop
4	28708283	80608758	51900475	BICF2P1435511	BICF2G630175073

## Sheet: Linkage summary
Genome regions that showed positive LOD scores for linkage to cerebellar ataxia in one family
Linkage analysis	Chromosome	Start critical interval	Stop critical interval	Size (bp)	First SNV (critical interval)	Last SNV (critical interval)	Maximum LOD Score	Alpha
	4	28688508	82007674	53319167	BICF2P1336742	BICF2G630176005	2.3054	1
	18	49048602	49190849	142248	BICF2P943899	CHR18_49190849	1.4761	1
Total				53461415

## Sheet: Linkage (raw Merlin output)
Raw output from the Merlin parametric linkage analysis. Positions are given in Mb with respect to the CanFam3.1 reference genome assembly.
CHR	POS	LABEL	MODEL	LOD	ALPHA	HLOD
1	0.0025	0.25	Phenotype_recessive	-9.6921	0	0
1	0.0026	0.256	Phenotype_recessive	-9.6922	0	0
1	0.0026	0.262	Phenotype_recessive	-9.6924	0	0
1	0.0027	0.268	Phenotype_recessive	-9.6926	0	0
1	0.0027	0.273	Phenotype_recessive	-9.6929	0	0
1	0.0028	0.282	Phenotype_recessive	-9.6929	0	0
1	0.0029	0.291	Phenotype_recessive	-9.693	0	0
1	0.003	0.299	Phenotype_recessive	-9.6934	0	0
1	0.0031	0.308	Phenotype_recessive	-9.6939	0	0
1	0.0031	0.311	Phenotype_recessive	-9.6939	0	0
1	0.0031	0.314	Phenotype_recessive	-9.6939	0	0
1	0.0032	0.317	Phenotype_recessive	-9.6939	0	0
1	0.0032	0.32	Phenotype_recessive	-9.6939	0	0
1	0.0033	0.326	Phenotype_recessive	-9.6938	0	0
1	0.0033	0.332	Phenotype_recessive	-9.6938	0	0
1	0.0034	0.338	Phenotype_recessive	-9.6938	0	0
1	0.0034	0.343	Phenotype_recessive	-9.6939	0	0
1	0.0035	0.348	Phenotype_recessive	-9.6938	0	0
1	0.0035	0.353	Phenotype_recessive	-9.6938	0	0
1	0.0036	0.359	Phenotype_recessive	-9.6938	0	0
1	0.0036	0.364	Phenotype_recessive	-9.6939	0	0
1	0.0037	0.366	Phenotype_recessive	-9.6939	0	0
1	0.0037	0.369	Phenotype_recessive	-9.6939	0	0
1	0.0037	0.371	Phenotype_recessive	-9.6939	0	0
1	0.0037	0.374	Phenotype_recessive	-9.6939	0	0
1	0.0038	0.38	Phenotype_recessive	-9.6938	0	0
1	0.0039	0.386	Phenotype_recessive	-9.6937	0	0
1	0.0039	0.393	Phenotype_recessive	-9.6938	0	0
1	0.004	0.399	Phenotype_recessive	-9.6939	0	0
1	0.004	0.402	Phenotype_recessive	-9.6938	0	0
1	0.0041	0.406	Phenotype_recessive	-9.6938	0	0
1	0.0041	0.409	Phenotype_recessive	-9.6937	0	0
1	0.0041	0.413	Phenotype_recessive	-9.6937	0	0
1	0.0041	0.414	Phenotype_recessive	-9.6937	0	0
1	0.0042	0.416	Phenotype_recessive	-9.6937	0	0
1	0.0042	0.418	Phenotype_recessive	-9.6937	0	0
1	0.0042	0.42	Phenotype_recessive	-9.6938	0	0
1	0.0042	0.423	Phenotype_recessive	-9.6938	0	0
1	0.0043	0.425	Phenotype_recessive	-9.6938	0	0
1	0.0043	0.428	Phenotype_recessive	-9.6939	0	0
1	0.0043	0.43	Phenotype_recessive	-9.6939	0	0
1	0.0044	0.442	Phenotype_recessive	-9.6933	0	0
1	0.0045	0.455	Phenotype_recessive	-9.6932	0	0
1	0.0047	0.467	Phenotype_recessive	-9.6933	0	0
1	0.0048	0.48	Phenotype_recessive	-9.6939	0	0
1	0.0048	0.481	Phenotype_recessive	-9.6939	0	0
1	0.0048	0.483	Phenotype_recessive	-9.6939	0	0
1	0.0048	0.485	Phenotype_recessive	-9.6939	0	0
1	0.0049	0.486	Phenotype_recessive	-9.6939	0	0
1	0.0049	0.489	Phenotype_recessive	-9.6939	0	0
1	0.0049	0.492	Phenotype_recessive	-9.6939	0	0
1	0.0049	0.495	Phenotype_recessive	-9.6939	0	0
1	0.005	0.497	Phenotype_recessive	-9.6939	0	0
1	0.0052	0.522	Phenotype_recessive	-9.6917	0	0
1	0.0055	0.546	Phenotype_recessive	-9.6909	0	0
1	0.0057	0.57	Phenotype_recessive	-9.6917	0	0
1	0.0059	0.594	Phenotype_recessive	-9.6939	0	0
1	0.006	0.596	Phenotype_recessive	-9.6939	0	0
1	0.006	0.597	Phenotype_recessive	-9.6939	0	0
1	0.006	0.599	Phenotype_recessive	-9.6939	0	0
1	0.006	0.601	Phenotype_recessive	-9.6939	0	0
1	0.006	0.601	Phenotype_recessive	-9.6939	0	0
1	0.006	0.601	Phenotype_recessive	-9.6939	0	0
1	0.006	0.602	Phenotype_recessive	-9.6939	0	0
1	0.006	0.602	Phenotype_recessive	-9.6939	0	0
1	0.006	0.602	Phenotype_recessive	-9.6939	0	0
1	0.006	0.602	Phenotype_recessive	-9.6939	0	0
1	0.006	0.602	Phenotype_recessive	-9.6939	0	0
1	0.006	0.603	Phenotype_recessive	-9.6939	0	0
1	0.0061	0.606	Phenotype_recessive	-9.6939	0	0
1	0.0061	0.609	Phenotype_recessive	-9.6939	0	0
1	0.0061	0.612	Phenotype_recessive	-9.6939	0	0
1	0.0061	0.615	Phenotype_recessive	-9.6939	0	0
1	0.0062	0.621	Phenotype_recessive	-9.6938	0	0
1	0.0063	0.627	Phenotype_recessive	-9.6937	0	0
1	0.0063	0.633	Phenotype_recessive	-9.6938	0	0
1	0.0064	0.64	Phenotype_recessive	-9.6939	0	0
1	0.0064	0.642	Phenotype_recessive	-9.6939	0	0
1	0.0065	0.645	Phenotype_recessive	-9.6939	0	0
1	0.0065	0.648	Phenotype_recessive	-9.6939	0	0
1	0.0065	0.65	Phenotype_recessive	-9.6939	0	0
1	0.0066	0.657	Phenotype_recessive	-9.6938	0	0
1	0.0066	0.663	Phenotype_recessive	-9.6937	0	0
1	0.0067	0.669	Phenotype_recessive	-9.6938	0	0
1	0.0068	0.676	Phenotype_recessive	-9.6939	0	0
1	0.0068	0.68	Phenotype_recessive	-9.6939	0	0
1	0.0068	0.684	Phenotype_recessive	-9.6939	0	0
1	0.0069	0.688	Phenotype_recessive	-9.6939	0	0
1	0.0069	0.692	Phenotype_recessive	-9.6939	0	0
1	0.007	0.698	Phenotype_recessive	-9.6938	0	0
1	0.007	0.703	Phenotype_recessive	-9.6938	0	0
1	0.0071	0.709	Phenotype_recessive	-9.6938	0	0
1	0.0071	0.714	Phenotype_recessive	-9.6939	0	0
1	0.0072	0.722	Phenotype_recessive	-9.6928	0	0
1	0.0073	0.729	Phenotype_recessive	-9.6917	0	0
1	0.0074	0.736	Phenotype_recessive	-9.6908	0	0
1	0.0074	0.743	Phenotype_recessive	-9.69	0	0
1	0.0075	0.746	Phenotype_recessive	-9.6896	0	0
1	0.0075	0.748	Phenotype_recessive	-9.6893	0	0
1	0.0075	0.751	Phenotype_recessive	-9.689	0	0
1	0.0075	0.753	Phenotype_recessive	-9.6887	0	0
1	0.0076	0.763	Phenotype_recessive	-9.6874	0	0
1	0.0077	0.772	Phenotype_recessive	-9.6863	0	0
1	0.0078	0.781	Phenotype_recessive	-9.6855	0	0
1	0.0079	0.79	Phenotype_recessive	-9.6849	0	0
1	0.0079	0.793	Phenotype_recessive	-9.6846	0	0
1	0.008	0.796	Phenotype_recessive	-9.6843	0	0
1	0.008	0.799	Phenotype_recessive	-9.6841	0	0
1	0.008	0.802	Phenotype_recessive	-9.6839	0	0
1	0.0081	0.807	Phenotype_recessive	-9.6835	0	0
1	0.0081	0.812	Phenotype_recessive	-9.6831	0	0
1	0.0082	0.818	Phenotype_recessive	-9.6828	0	0
1	0.0082	0.823	Phenotype_recessive	-9.6825	0	0
1	0.0083	0.827	Phenotype_recessive	-9.6822	0	0
1	0.0083	0.832	Phenotype_recessive	-9.682	0	0
1	0.0084	0.836	Phenotype_recessive	-9.6818	0	0
1	0.0084	0.841	Phenotype_recessive	-9.6816	0	0
1	0.0085	0.846	Phenotype_recessive	-9.6813	0	0
1	0.0085	0.851	Phenotype_recessive	-9.6811	0	0
1	0.0086	0.856	Phenotype_recessive	-9.681	0	0
1	0.0086	0.861	Phenotype_recessive	-9.6809	0	0
1	0.0086	0.862	Phenotype_recessive	-9.6809	0	0
1	0.0086	0.864	Phenotype_recessive	-9.6808	0	0
1	0.0087	0.866	Phenotype_recessive	-9.6808	0	0
1	0.0087	0.867	Phenotype_recessive	-9.6808	0	0
1	0.0087	0.869	Phenotype_recessive	-9.6808	0	0
1	0.0087	0.871	Phenotype_recessive	-9.6807	0	0
1	0.0087	0.872	Phenotype_recessive	-9.6807	0	0
1	0.0087	0.874	Phenotype_recessive	-9.6807	0	0
1	0.0088	0.878	Phenotype_recessive	-9.6806	0	0
1	0.0088	0.882	Phenotype_recessive	-9.6806	0	0
1	0.0089	0.885	Phenotype_recessive	-9.6806	0	0
1	0.0089	0.889	Phenotype_recessive	-9.6806	0	0
1	0.0089	0.891	Phenotype_recessive	-9.6806	0	0
1	0.0089	0.892	Phenotype_recessive	-9.6806	0	0
1	0.0089	0.894	Phenotype_recessive	-9.6806	0	0
1	0.009	0.896	Phenotype_recessive	-9.6806	0	0
1	0.009	0.896	Phenotype_recessive	-9.6806	0	0
1	0.009	0.896	Phenotype_recessive	-9.6806	0	0
1	0.009	0.897	Phenotype_recessive	-9.6806	0	0
1	0.009	0.897	Phenotype_recessive	-9.6806	0	0
1	0.009	0.901	Phenotype_recessive	-9.6806	0	0
1	0.009	0.905	Phenotype_recessive	-9.6807	0	0
1	0.0091	0.909	Phenotype_recessive	-9.6807	0	0
1	0.0091	0.912	Phenotype_recessive	-9.6808	0	0
1	0.0091	0.915	Phenotype_recessive	-9.6809	0	0
1	0.0092	0.917	Phenotype_recessive	-9.6809	0	0
1	0.0092	0.919	Phenotype_recessive	-9.681	0	0
1	0.0092	0.921	Phenotype_recessive	-9.6811	0	0
1	0.0093	0.932	Phenotype_recessive	-9.6811	0	0
1	0.0094	0.942	Phenotype_recessive	-9.6815	0	0
1	0.0095	0.953	Phenotype_recessive	-9.6821	0	0
1	0.0096	0.963	Phenotype_recessive	-9.6831	0	0
1	0.0096	0.964	Phenotype_recessive	-9.6831	0	0
1	0.0097	0.966	Phenotype_recessive	-9.6832	0	0
1	0.0097	0.967	Phenotype_recessive	-9.6833	0	0
1	0.0097	0.968	Phenotype_recessive	-9.6834	0	0
1	0.0098	0.976	Phenotype_recessive	-9.6838	0	0
1	0.0098	0.983	Phenotype_recessive	-9.6843	0	0
1	0.0099	0.99	Phenotype_recessive	-9.685	0	0
1	0.01	0.998	Phenotype_recessive	-9.6859	0	0
1	0.01	1.001	Phenotype_recessive	-9.6862	0	0
1	0.01	1.005	Phenotype_recessive	-9.6865	0	0
1	0.0101	1.008	Phenotype_recessive	-9.6869	0	0
1	0.0101	1.012	Phenotype_recessive	-9.6873	0	0
1	0.0102	1.016	Phenotype_recessive	-9.6877	0	0
1	0.0102	1.019	Phenotype_recessive	-9.6881	0	0
1	0.0102	1.023	Phenotype_recessive	-9.6885	0	0
1	0.0103	1.027	Phenotype_recessive	-9.689	0	0
1	0.0103	1.027	Phenotype_recessive	-9.689	0	0
1	0.0103	1.027	Phenotype_recessive	-9.6891	0	0
1	0.0103	1.027	Phenotype_recessive	-9.6891	0	0
1	0.0103	1.028	Phenotype_recessive	-9.6891	0	0
1	0.0103	1.028	Phenotype_recessive	-9.6891	0	0
1	0.0103	1.028	Phenotype_recessive	-9.6891	0	0
1	0.0103	1.028	Phenotype_recessive	-9.6891	0	0
1	0.0103	1.028	Phenotype_recessive	-9.6891	0	0
1	0.0103	1.028	Phenotype_recessive	-9.6892	0	0
1	0.0103	1.029	Phenotype_recessive	-9.6893	0	0
1	0.0103	1.03	Phenotype_recessive	-9.6894	0	0
1	0.0103	1.031	Phenotype_recessive	-9.6895	0	0
1	0.0103	1.032	Phenotype_recessive	-9.6897	0	0
1	0.0103	1.034	Phenotype_recessive	-9.6899	0	0
1	0.0103	1.035	Phenotype_recessive	-9.69	0	0
1	0.0104	1.036	Phenotype_recessive	-9.6902	0	0
1	0.0104	1.039	Phenotype_recessive	-9.6906	0	0
1	0.0104	1.042	Phenotype_recessive	-9.691	0	0
1	0.0105	1.045	Phenotype_recessive	-9.6914	0	0
1	0.0105	1.049	Phenotype_recessive	-9.6919	0	0
1	0.0105	1.049	Phenotype_recessive	-9.6919	0	0
1	0.0105	1.049	Phenotype_recessive	-9.6919	0	0
1	0.0105	1.049	Phenotype_recessive	-9.692	0	0
1	0.0105	1.05	Phenotype_recessive	-9.692	0	0
1	0.0105	1.053	Phenotype_recessive	-9.6925	0	0
1	0.0106	1.056	Phenotype_recessive	-9.6929	0	0
1	0.0106	1.06	Phenotype_recessive	-9.6934	0	0
1	0.0106	1.063	Phenotype_recessive	-9.6939	0	0
1	0.0107	1.066	Phenotype_recessive	-9.6938	0	0
1	0.0107	1.069	Phenotype_recessive	-9.6937	0	0
1	0.0107	1.071	Phenotype_recessive	-9.6936	0	0
1	0.0107	1.074	Phenotype_recessive	-9.6935	0	0
1	0.0108	1.077	Phenotype_recessive	-9.6934	0	0
1	0.0108	1.079	Phenotype_recessive	-9.6933	0	0
1	0.0108	1.082	Phenotype_recessive	-9.6932	0	0
1	0.0108	1.084	Phenotype_recessive	-9.6932	0	0
1	0.0109	1.088	Phenotype_recessive	-9.6931	0	0
1	0.0109	1.093	Phenotype_recessive	-9.693	0	0
1	0.011	1.097	Phenotype_recessive	-9.6929	0	0
1	0.011	1.101	Phenotype_recessive	-9.6929	0	0
1	0.011	1.104	Phenotype_recessive	-9.6928	0	0
1	0.0111	1.106	Phenotype_recessive	-9.6928	0	0
1	0.0111	1.108	Phenotype_recessive	-9.6928	0	0
1	0.0111	1.111	Phenotype_recessive	-9.6928	0	0
1	0.0111	1.113	Phenotype_recessive	-9.6928	0	0
1	0.0112	1.116	Phenotype_recessive	-9.6928	0	0
1	0.0112	1.118	Phenotype_recessive	-9.6928	0	0
1	0.0112	1.121	Phenotype_recessive	-9.6928	0	0
1	0.0112	1.124	Phenotype_recessive	-9.6928	0	0
1	0.0113	1.127	Phenotype_recessive	-9.6929	0	0
1	0.0113	1.129	Phenotype_recessive	-9.6929	0	0
1	0.0113	1.132	Phenotype_recessive	-9.693	0	0
1	0.0113	1.133	Phenotype_recessive	-9.693	0	0
1	0.0113	1.135	Phenotype_recessive	-9.693	0	0
1	0.0114	1.136	Phenotype_recessive	-9.693	0	0
1	0.0114	1.137	Phenotype_recessive	-9.693	0	0
1	0.0114	1.144	Phenotype_recessive	-9.6931	0	0
1	0.0115	1.151	Phenotype_recessive	-9.6932	0	0
1	0.0116	1.158	Phenotype_recessive	-9.6935	0	0
1	0.0116	1.165	Phenotype_recessive	-9.6939	0	0
1	0.0117	1.168	Phenotype_recessive	-9.6939	0	0
1	0.0117	1.172	Phenotype_recessive	-9.6939	0	0
1	0.0117	1.175	Phenotype_recessive	-9.6939	0	0
1	0.0118	1.178	Phenotype_recessive	-9.6939	0	0
1	0.0119	1.192	Phenotype_recessive	-9.6932	0	0
1	0.0121	1.206	Phenotype_recessive	-9.693	0	0
1	0.0122	1.22	Phenotype_recessive	-9.6932	0	0
1	0.0123	1.234	Phenotype_recessive	-9.6939	0	0
1	0.0124	1.237	Phenotype_recessive	-9.6937	0	0
1	0.0124	1.239	Phenotype_recessive	-9.6936	0	0
1	0.0124	1.242	Phenotype_recessive	-9.6934	0	0
1	0.0125	1.245	Phenotype_recessive	-9.6933	0	0
1	0.0126	1.26	Phenotype_recessive	-9.6925	0	0
1	0.0127	1.275	Phenotype_recessive	-9.6922	0	0
1	0.0129	1.289	Phenotype_recessive	-9.6926	0	0
1	0.013	1.304	Phenotype_recessive	-9.6934	0	0
1	0.0131	1.306	Phenotype_recessive	-9.6935	0	0
1	0.0131	1.308	Phenotype_recessive	-9.6937	0	0
1	0.0131	1.31	Phenotype_recessive	-9.6938	0	0
1	0.0131	1.312	Phenotype_recessive	-9.6939	0	0
1	0.0132	1.316	Phenotype_recessive	-9.6939	0	0
1	0.0132	1.319	Phenotype_recessive	-9.6939	0	0
1	0.0132	1.323	Phenotype_recessive	-9.6939	0	0
1	0.0133	1.326	Phenotype_recessive	-9.6939	0	0
1	0.0134	1.341	Phenotype_recessive	-9.6931	0	0
1	0.0136	1.355	Phenotype_recessive	-9.6928	0	0
1	0.0137	1.37	Phenotype_recessive	-9.6931	0	0
1	0.0138	1.385	Phenotype_recessive	-9.6939	0	0
1	0.0139	1.389	Phenotype_recessive	-9.6939	0	0
1	0.0139	1.393	Phenotype_recessive	-9.6938	0	0
1	0.014	1.397	Phenotype_recessive	-9.6938	0	0
1	0.014	1.4	Phenotype_recessive	-9.6939	0	0
1	0.014	1.403	Phenotype_recessive	-9.6938	0	0
1	0.0141	1.406	Phenotype_recessive	-9.6938	0	0
1	0.0141	1.409	Phenotype_recessive	-9.6939	0	0
1	0.0141	1.412	Phenotype_recessive	-9.6939	0	0
1	0.0141	1.412	Phenotype_recessive	-9.6939	0	0
1	0.0141	1.413	Phenotype_recessive	-9.6939	0	0
1	0.0141	1.413	Phenotype_recessive	-9.6939	0	0
1	0.0141	1.414	Phenotype_recessive	-9.6939	0	0
1	0.0141	1.414	Phenotype_recessive	-9.6939	0	0
1	0.0141	1.414	Phenotype_recessive	-9.6939	0	0
1	0.0141	1.414	Phenotype_recessive	-9.6939	0	0
1	0.0141	1.414	Phenotype_recessive	-9.6939	0	0
1	0.0141	1.414	Phenotype_recessive	-9.6939	0	0
1	0.0141	1.414	Phenotype_recessive	-9.6939	0	0
1	0.0141	1.415	Phenotype_recessive	-9.6939	0	0
1	0.0141	1.415	Phenotype_recessive	-9.6939	0	0
1	0.0142	1.419	Phenotype_recessive	-9.6939	0	0
1	0.0142	1.423	Phenotype_recessive	-9.6939	0	0
1	0.0143	1.427	Phenotype_recessive	-9.6939	0	0
1	0.0143	1.43	Phenotype_recessive	-9.6939	0	0
1	0.0144	1.438	Phenotype_recessive	-9.6937	0	0
1	0.0145	1.446	Phenotype_recessive	-9.6936	0	0
1	0.0145	1.453	Phenotype_recessive	-9.6937	0	0
1	0.0146	1.461	Phenotype_recessive	-9.6939	0	0
1	0.0147	1.467	Phenotype_recessive	-9.6938	0	0
1	0.0147	1.474	Phenotype_recessive	-9.6937	0	0
1	0.0148	1.481	Phenotype_recessive	-9.6938	0	0
1	0.0149	1.487	Phenotype_recessive	-9.6939	0	0
1	0.0149	1.49	Phenotype_recessive	-9.6939	0	0
1	0.0149	1.493	Phenotype_recessive	-9.6938	0	0
1	0.015	1.496	Phenotype_recessive	-9.6938	0	0
1	0.015	1.499	Phenotype_recessive	-9.6938	0	0
1	0.0151	1.507	Phenotype_recessive	-9.6936	0	0
1	0.0152	1.515	Phenotype_recessive	-9.6935	0	0
1	0.0152	1.523	Phenotype_recessive	-9.6936	0	0
1	0.0153	1.532	Phenotype_recessive	-9.6939	0	0
1	0.0153	1.535	Phenotype_recessive	-9.6939	0	0
1	0.0154	1.538	Phenotype_recessive	-9.6938	0	0
1	0.0154	1.541	Phenotype_recessive	-9.6938	0	0
1	0.0154	1.545	Phenotype_recessive	-9.6938	0	0
1	0.0155	1.549	Phenotype_recessive	-9.6938	0	0
1	0.0155	1.554	Phenotype_recessive	-9.6938	0	0
1	0.0156	1.558	Phenotype_recessive	-9.6938	0	0
1	0.0156	1.562	Phenotype_recessive	-9.6939	0	0
1	0.0157	1.571	Phenotype_recessive	-9.6932	0	0
1	0.0158	1.579	Phenotype_recessive	-9.6927	0	0
1	0.0159	1.587	Phenotype_recessive	-9.6924	0	0
1	0.0159	1.595	Phenotype_recessive	-9.6922	0	0
1	0.016	1.598	Phenotype_recessive	-9.692	0	0
1	0.016	1.602	Phenotype_recessive	-9.6918	0	0
1	0.0161	1.605	Phenotype_recessive	-9.6917	0	0
1	0.0161	1.609	Phenotype_recessive	-9.6917	0	0
1	0.0162	1.617	Phenotype_recessive	-9.6912	0	0
1	0.0163	1.626	Phenotype_recessive	-9.691	0	0
1	0.0163	1.635	Phenotype_recessive	-9.691	0	0
1	0.0164	1.643	Phenotype_recessive	-9.6912	0	0
1	0.0166	1.658	Phenotype_recessive	-9.6907	0	0
1	0.0167	1.672	Phenotype_recessive	-9.6908	0	0
1	0.0169	1.686	Phenotype_recessive	-9.6915	0	0
1	0.017	1.701	Phenotype_recessive	-9.6926	0	0
1	0.0171	1.706	Phenotype_recessive	-9.6928	0	0
1	0.0171	1.712	Phenotype_recessive	-9.6931	0	0
1	0.0172	1.717	Phenotype_recessive	-9.6935	0	0
1	0.0172	1.722	Phenotype_recessive	-9.6939	0	0
1	0.0172	1.724	Phenotype_recessive	-9.6939	0	0
1	0.0173	1.725	Phenotype_recessive	-9.6939	0	0
1	0.0173	1.727	Phenotype_recessive	-9.6938	0	0
1	0.0173	1.728	Phenotype_recessive	-9.6938	0	0
1	0.0173	1.734	Phenotype_recessive	-9.6936	0	0
1	0.0174	1.74	Phenotype_recessive	-9.6935	0	0
1	0.0175	1.746	Phenotype_recessive	-9.6935	0	0
1	0.0175	1.752	Phenotype_recessive	-9.6936	0	0
1	0.0175	1.754	Phenotype_recessive	-9.6936	0	0
1	0.0176	1.756	Phenotype_recessive	-9.6936	0	0
1	0.0176	1.758	Phenotype_recessive	-9.6936	0	0
1	0.0176	1.76	Phenotype_recessive	-9.6936	0	0
1	0.0176	1.765	Phenotype_recessive	-9.6936	0	0
1	0.0177	1.77	Phenotype_recessive	-9.6937	0	0
1	0.0177	1.775	Phenotype_recessive	-9.6938	0	0
1	0.0178	1.78	Phenotype_recessive	-9.6939	0	0
1	0.0178	1.781	Phenotype_recessive	-9.6939	0	0
1	0.0178	1.783	Phenotype_recessive	-9.6939	0	0
1	0.0178	1.784	Phenotype_recessive	-9.6939	0	0
1	0.0179	1.785	Phenotype_recessive	-9.6939	0	0
1	0.0179	1.786	Phenotype_recessive	-9.6939	0	0
1	0.0179	1.786	Phenotype_recessive	-9.6939	0	0
1	0.0179	1.787	Phenotype_recessive	-9.6939	0	0
1	0.0179	1.787	Phenotype_recessive	-9.6939	0	0
1	0.0179	1.789	Phenotype_recessive	-9.6939	0	0
1	0.0179	1.792	Phenotype_recessive	-9.6939	0	0
1	0.0179	1.794	Phenotype_recessive	-9.6939	0	0
1	0.018	1.796	Phenotype_recessive	-9.6939	0	0
1	0.018	1.8	Phenotype_recessive	-9.6938	0	0
1	0.018	1.804	Phenotype_recessive	-9.6938	0	0
1	0.0181	1.807	Phenotype_recessive	-9.6938	0	0
1	0.0181	1.811	Phenotype_recessive	-9.6938	0	0
1	0.0182	1.818	Phenotype_recessive	-9.6936	0	0
1	0.0182	1.825	Phenotype_recessive	-9.6936	0	0
1	0.0183	1.832	Phenotype_recessive	-9.6937	0	0
1	0.0184	1.839	Phenotype_recessive	-9.6939	0	0
1	0.0185	1.853	Phenotype_recessive	-9.6922	0	0
1	0.0187	1.867	Phenotype_recessive	-9.691	0	0
1	0.0188	1.882	Phenotype_recessive	-9.6903	0	0
1	0.019	1.896	Phenotype_recessive	-9.6902	0	0
1	0.0193	1.934	Phenotype_recessive	-9.6765	0	0
1	0.0197	1.972	Phenotype_recessive	-9.6668	0	0
1	0.0201	2.01	Phenotype_recessive	-9.6608	0	0
1	0.0205	2.048	Phenotype_recessive	-9.6585	0	0
1	0.0208	2.08	Phenotype_recessive	-9.6548	0	0
1	0.0211	2.112	Phenotype_recessive	-9.6536	0	0
1	0.0214	2.143	Phenotype_recessive	-9.6548	0	0
1	0.0218	2.175	Phenotype_recessive	-9.6584	0	0
1	0.022	2.204	Phenotype_recessive	-9.6609	0	0
1	0.0223	2.232	Phenotype_recessive	-9.6655	0	0
1	0.0226	2.261	Phenotype_recessive	-9.6721	0	0
1	0.0229	2.289	Phenotype_recessive	-9.6809	0	0
1	0.023	2.299	Phenotype_recessive	-9.6794	0	0
1	0.0231	2.309	Phenotype_recessive	-9.678	0	0
1	0.0232	2.319	Phenotype_recessive	-9.6768	0	0
1	0.0233	2.328	Phenotype_recessive	-9.6759	0	0
1	0.0233	2.333	Phenotype_recessive	-9.6737	0	0
1	0.0234	2.338	Phenotype_recessive	-9.6715	0	0
1	0.0234	2.343	Phenotype_recessive	-9.6694	0	0
1	0.0235	2.347	Phenotype_recessive	-9.6673	0	0
1	0.0235	2.351	Phenotype_recessive	-9.6657	0	0
1	0.0235	2.355	Phenotype_recessive	-9.664	0	0
1	0.0236	2.358	Phenotype_recessive	-9.6624	0	0
1	0.0236	2.362	Phenotype_recessive	-9.6608	0	0
1	0.0237	2.366	Phenotype_recessive	-9.6592	0	0
1	0.0237	2.369	Phenotype_recessive	-9.6576	0	0
1	0.0237	2.373	Phenotype_recessive	-9.6561	0	0
1	0.0238	2.376	Phenotype_recessive	-9.6546	0	0
1	0.0238	2.378	Phenotype_recessive	-9.6538	0	0
1	0.0238	2.38	Phenotype_recessive	-9.6531	0	0
1	0.0238	2.382	Phenotype_recessive	-9.6524	0	0
1	0.0238	2.383	Phenotype_recessive	-9.6516	0	0
1	0.0239	2.389	Phenotype_recessive	-9.649	0	0
1	0.024	2.395	Phenotype_recessive	-9.6466	0	0
1	0.024	2.401	Phenotype_recessive	-9.6441	0	0
1	0.0241	2.407	Phenotype_recessive	-9.6418	0	0
1	0.0241	2.409	Phenotype_recessive	-9.6411	0	0
1	0.0241	2.411	Phenotype_recessive	-9.6404	0	0
1	0.0241	2.412	Phenotype_recessive	-9.6397	0	0
1	0.0241	2.414	Phenotype_recessive	-9.6391	0	0
1	0.0244	2.436	Phenotype_recessive	-9.6294	0	0
1	0.0246	2.458	Phenotype_recessive	-9.6209	0	0
1	0.0248	2.479	Phenotype_recessive	-9.6136	0	0
1	0.025	2.501	Phenotype_recessive	-9.6074	0	0
1	0.025	2.503	Phenotype_recessive	-9.6068	0	0
1	0.025	2.505	Phenotype_recessive	-9.6063	0	0
1	0.0251	2.506	Phenotype_recessive	-9.6057	0	0
1	0.0251	2.508	Phenotype_recessive	-9.6052	0	0
1	0.0252	2.519	Phenotype_recessive	-9.6016	0	0
1	0.0253	2.529	Phenotype_recessive	-9.5983	0	0
1	0.0254	2.54	Phenotype_recessive	-9.5953	0	0
1	0.0255	2.55	Phenotype_recessive	-9.5925	0	0
1	0.0261	2.611	Phenotype_recessive	-9.569	0	0
1	0.0267	2.672	Phenotype_recessive	-9.5548	0	0
1	0.0273	2.733	Phenotype_recessive	-9.5495	0	0
1	0.0279	2.794	Phenotype_recessive	-9.5531	0	0
1	0.028	2.799	Phenotype_recessive	-9.5529	0	0
1	0.028	2.805	Phenotype_recessive	-9.5527	0	0
1	0.0281	2.81	Phenotype_recessive	-9.5526	0	0
1	0.0282	2.815	Phenotype_recessive	-9.5525	0	0
1	0.0285	2.848	Phenotype_recessive	-9.55	0	0
1	0.0288	2.882	Phenotype_recessive	-9.5502	0	0
1	0.0291	2.915	Phenotype_recessive	-9.5531	0	0
1	0.0295	2.948	Phenotype_recessive	-9.5587	0	0
1	0.0297	2.972	Phenotype_recessive	-9.5604	0	0
1	0.0299	2.995	Phenotype_recessive	-9.5634	0	0
1	0.0302	3.018	Phenotype_recessive	-9.5678	0	0
1	0.0304	3.042	Phenotype_recessive	-9.5735	0	0
1	0.0306	3.059	Phenotype_recessive	-9.5766	0	0
1	0.0308	3.076	Phenotype_recessive	-9.5803	0	0
1	0.0309	3.094	Phenotype_recessive	-9.5849	0	0
1	0.0311	3.111	Phenotype_recessive	-9.5901	0	0
1	0.0312	3.115	Phenotype_recessive	-9.5912	0	0
1	0.0312	3.119	Phenotype_recessive	-9.5923	0	0
1	0.0312	3.123	Phenotype_recessive	-9.5935	0	0
1	0.0313	3.127	Phenotype_recessive	-9.5946	0	0
1	0.0315	3.146	Phenotype_recessive	-9.5993	0	0
1	0.0316	3.164	Phenotype_recessive	-9.6047	0	0
1	0.0318	3.182	Phenotype_recessive	-9.611	0	0
1	0.032	3.2	Phenotype_recessive	-9.6181	0	0
1	0.0321	3.211	Phenotype_recessive	-9.6217	0	0
1	0.0322	3.222	Phenotype_recessive	-9.6256	0	0
1	0.0323	3.233	Phenotype_recessive	-9.6298	0	0
1	0.0324	3.244	Phenotype_recessive	-9.6343	0	0
1	0.0326	3.26	Phenotype_recessive	-9.6401	0	0
1	0.0328	3.276	Phenotype_recessive	-9.6465	0	0
1	0.0329	3.293	Phenotype_recessive	-9.6535	0	0
1	0.0331	3.309	Phenotype_recessive	-9.6611	0	0
1	0.0333	3.325	Phenotype_recessive	-9.6677	0	0
1	0.0334	3.342	Phenotype_recessive	-9.6749	0	0
1	0.0336	3.358	Phenotype_recessive	-9.6827	0	0
1	0.0337	3.375	Phenotype_recessive	-9.6911	0	0
1	0.0338	3.376	Phenotype_recessive	-9.6918	0	0
1	0.0338	3.378	Phenotype_recessive	-9.6925	0	0
1	0.0338	3.379	Phenotype_recessive	-9.6932	0	0
1	0.0338	3.381	Phenotype_recessive	-9.6939	0	0
1	0.0339	3.39	Phenotype_recessive	-9.6936	0	0
1	0.034	3.4	Phenotype_recessive	-9.6935	0	0
1	0.0341	3.41	Phenotype_recessive	-9.6936	0	0
1	0.0342	3.42	Phenotype_recessive	-9.6939	0	0
1	0.0342	3.422	Phenotype_recessive	-9.6939	0	0
1	0.0342	3.424	Phenotype_recessive	-9.6939	0	0
1	0.0343	3.426	Phenotype_recessive	-9.6939	0	0
1	0.0343	3.428	Phenotype_recessive	-9.6939	0	0
1	0.0344	3.441	Phenotype_recessive	-9.6933	0	0
1	0.0345	3.455	Phenotype_recessive	-9.693	0	0
1	0.0347	3.468	Phenotype_recessive	-9.6933	0	0
1	0.0348	3.481	Phenotype_recessive	-9.6939	0	0
1	0.0353	3.535	Phenotype_recessive	-9.6807	0	0
1	0.0359	3.589	Phenotype_recessive	-9.675	0	0
1	0.0364	3.643	Phenotype_recessive	-9.6768	0	0
1	0.037	3.697	Phenotype_recessive	-9.6862	0	0
1	0.0371	3.713	Phenotype_recessive	-9.6866	0	0
1	0.0373	3.729	Phenotype_recessive	-9.6877	0	0
1	0.0374	3.745	Phenotype_recessive	-9.6894	0	0
1	0.0376	3.761	Phenotype_recessive	-9.6917	0	0
1	0.0377	3.765	Phenotype_recessive	-9.6921	0	0
1	0.0377	3.77	Phenotype_recessive	-9.6926	0	0
1	0.0377	3.774	Phenotype_recessive	-9.6931	0	0
1	0.0378	3.779	Phenotype_recessive	-9.6937	0	0
1	0.0378	3.783	Phenotype_recessive	-9.6937	0	0
1	0.0379	3.788	Phenotype_recessive	-9.6937	0	0
1	0.0379	3.792	Phenotype_recessive	-9.6938	0	0
1	0.038	3.797	Phenotype_recessive	-9.6939	0	0
1	0.038	3.804	Phenotype_recessive	-9.6935	0	0
1	0.0381	3.812	Phenotype_recessive	-9.6933	0	0
1	0.0382	3.82	Phenotype_recessive	-9.6932	0	0
1	0.0383	3.828	Phenotype_recessive	-9.6933	0	0
1	0.0383	3.832	Phenotype_recessive	-9.6932	0	0
1	0.0384	3.835	Phenotype_recessive	-9.6932	0	0
1	0.0384	3.839	Phenotype_recessive	-9.6932	0	0
1	0.0384	3.843	Phenotype_recessive	-9.6933	0	0
1	0.0385	3.851	Phenotype_recessive	-9.6932	0	0
1	0.0386	3.859	Phenotype_recessive	-9.6933	0	0
1	0.0387	3.867	Phenotype_recessive	-9.6935	0	0
1	0.0388	3.875	Phenotype_recessive	-9.6939	0	0
1	0.0389	3.893	Phenotype_recessive	-9.6927	0	0
1	0.0391	3.911	Phenotype_recessive	-9.6923	0	0
1	0.0393	3.929	Phenotype_recessive	-9.6927	0	0
1	0.0395	3.947	Phenotype_recessive	-9.6939	0	0
1	0.0395	3.951	Phenotype_recessive	-9.6939	0	0
1	0.0395	3.955	Phenotype_recessive	-9.6938	0	0
1	0.0396	3.959	Phenotype_recessive	-9.6939	0	0
1	0.0396	3.963	Phenotype_recessive	-9.6939	0	0
1	0.0396	3.963	Phenotype_recessive	-9.6939	0	0
1	0.0396	3.964	Phenotype_recessive	-9.6939	0	0
1	0.0396	3.964	Phenotype_recessive	-9.6939	0	0
1	0.0396	3.965	Phenotype_recessive	-9.6939	0	0
1	0.0397	3.965	Phenotype_recessive	-9.6939	0	0
1	0.0397	3.966	Phenotype_recessive	-9.6939	0	0
1	0.0397	3.967	Phenotype_recessive	-9.6939	0	0
1	0.0397	3.967	Phenotype_recessive	-9.6939	0	0
1	0.0397	3.973	Phenotype_recessive	-9.6938	0	0
1	0.0398	3.978	Phenotype_recessive	-9.6938	0	0
1	0.0398	3.984	Phenotype_recessive	-9.6938	0	0
1	0.0399	3.989	Phenotype_recessive	-9.6939	0	0
1	0.0399	3.989	Phenotype_recessive	-9.6939	0	0
1	0.0399	3.99	Phenotype_recessive	-9.6939	0	0
1	0.0399	3.99	Phenotype_recessive	-9.6939	0	0
1	0.0399	3.99	Phenotype_recessive	-9.6939	0	0
1	0.04	3.995	Phenotype_recessive	-9.6938	0	0
1	0.04	4	Phenotype_recessive	-9.6938	0	0
1	0.0401	4.005	Phenotype_recessive	-9.6938	0	0
1	0.0401	4.01	Phenotype_recessive	-9.6939	0	0
1	0.0401	4.013	Phenotype_recessive	-9.6939	0	0
1	0.0402	4.016	Phenotype_recessive	-9.6939	0	0
1	0.0402	4.019	Phenotype_recessive	-9.6939	0	0
1	0.0402	4.021	Phenotype_recessive	-9.6939	0	0
1	0.0402	4.024	Phenotype_recessive	-9.6939	0	0
1	0.0403	4.027	Phenotype_recessive	-9.6939	0	0
1	0.0403	4.03	Phenotype_recessive	-9.6939	0	0
1	0.0403	4.033	Phenotype_recessive	-9.6939	0	0
1	0.0404	4.036	Phenotype_recessive	-9.6939	0	0
1	0.0404	4.039	Phenotype_recessive	-9.6939	0	0
1	0.0404	4.042	Phenotype_recessive	-9.6939	0	0
1	0.0404	4.045	Phenotype_recessive	-9.6939	0	0
1	0.0405	4.046	Phenotype_recessive	-9.6939	0	0
1	0.0405	4.048	Phenotype_recessive	-9.6939	0	0
1	0.0405	4.05	Phenotype_recessive	-9.6939	0	0
1	0.0405	4.051	Phenotype_recessive	-9.6939	0	0
1	0.0405	4.054	Phenotype_recessive	-9.6939	0	0
1	0.0406	4.056	Phenotype_recessive	-9.6939	0	0
1	0.0406	4.059	Phenotype_recessive	-9.6939	0	0
1	0.0406	4.062	Phenotype_recessive	-9.6939	0	0
1	0.0407	4.066	Phenotype_recessive	-9.6939	0	0
1	0.0407	4.07	Phenotype_recessive	-9.6938	0	0
1	0.0407	4.075	Phenotype_recessive	-9.6939	0	0
1	0.0408	4.079	Phenotype_recessive	-9.6939	0	0
1	0.0408	4.082	Phenotype_recessive	-9.6939	0	0
1	0.0408	4.085	Phenotype_recessive	-9.6939	0	0
1	0.0409	4.088	Phenotype_recessive	-9.6939	0	0
1	0.0409	4.09	Phenotype_recessive	-9.6939	0	0
1	0.0409	4.093	Phenotype_recessive	-9.6939	0	0
1	0.0409	4.095	Phenotype_recessive	-9.6939	0	0
1	0.041	4.097	Phenotype_recessive	-9.6939	0	0
1	0.041	4.1	Phenotype_recessive	-9.6939	0	0
1	0.041	4.105	Phenotype_recessive	-9.6938	0	0
1	0.0411	4.11	Phenotype_recessive	-9.6938	0	0
1	0.0412	4.115	Phenotype_recessive	-9.6938	0	0
1	0.0412	4.121	Phenotype_recessive	-9.6939	0	0
1	0.0412	4.124	Phenotype_recessive	-9.6939	0	0
1	0.0413	4.127	Phenotype_recessive	-9.6939	0	0
1	0.0413	4.131	Phenotype_recessive	-9.6939	0	0
1	0.0413	4.134	Phenotype_recessive	-9.6939	0	0
1	0.0414	4.14	Phenotype_recessive	-9.6938	0	0
1	0.0415	4.146	Phenotype_recessive	-9.6938	0	0
1	0.0415	4.151	Phenotype_recessive	-9.6938	0	0
1	0.0416	4.157	Phenotype_recessive	-9.6939	0	0
1	0.0416	4.161	Phenotype_recessive	-9.6938	0	0
1	0.0416	4.165	Phenotype_recessive	-9.6938	0	0
1	0.0417	4.169	Phenotype_recessive	-9.6937	0	0
1	0.0417	4.172	Phenotype_recessive	-9.6937	0	0
1	0.0417	4.173	Phenotype_recessive	-9.6937	0	0
1	0.0417	4.174	Phenotype_recessive	-9.6937	0	0
1	0.0417	4.174	Phenotype_recessive	-9.6937	0	0
1	0.0417	4.175	Phenotype_recessive	-9.6937	0	0
1	0.0418	4.182	Phenotype_recessive	-9.6934	0	0
1	0.0419	4.19	Phenotype_recessive	-9.6933	0	0
1	0.042	4.197	Phenotype_recessive	-9.6932	0	0
1	0.042	4.204	Phenotype_recessive	-9.6934	0	0
1	0.0421	4.21	Phenotype_recessive	-9.6934	0	0
1	0.0422	4.216	Phenotype_recessive	-9.6935	0	0
1	0.0422	4.221	Phenotype_recessive	-9.6937	0	0
1	0.0423	4.227	Phenotype_recessive	-9.6939	0	0
1	0.0423	4.227	Phenotype_recessive	-9.6939	0	0
1	0.0423	4.227	Phenotype_recessive	-9.6939	0	0
1	0.0423	4.228	Phenotype_recessive	-9.6939	0	0
1	0.0423	4.228	Phenotype_recessive	-9.6939	0	0
1	0.0424	4.237	Phenotype_recessive	-9.6936	0	0
1	0.0425	4.246	Phenotype_recessive	-9.6935	0	0
1	0.0426	4.255	Phenotype_recessive	-9.6936	0	0
1	0.0426	4.264	Phenotype_recessive	-9.6939	0	0
1	0.0427	4.266	Phenotype_recessive	-9.6938	0	0
1	0.0427	4.268	Phenotype_recessive	-9.6937	0	0
1	0.0427	4.27	Phenotype_recessive	-9.6935	0	0
1	0.0427	4.272	Phenotype_recessive	-9.6934	0	0
1	0.0428	4.275	Phenotype_recessive	-9.6933	0	0
1	0.0428	4.278	Phenotype_recessive	-9.6931	0	0
1	0.0428	4.281	Phenotype_recessive	-9.693	0	0
1	0.0428	4.284	Phenotype_recessive	-9.6929	0	0
1	0.0429	4.293	Phenotype_recessive	-9.6925	0	0
1	0.043	4.302	Phenotype_recessive	-9.6923	0	0
1	0.0431	4.311	Phenotype_recessive	-9.6924	0	0
1	0.0432	4.32	Phenotype_recessive	-9.6927	0	0
1	0.0433	4.327	Phenotype_recessive	-9.6921	0	0
1	0.0433	4.334	Phenotype_recessive	-9.6917	0	0
1	0.0434	4.34	Phenotype_recessive	-9.6913	0	0
1	0.0435	4.347	Phenotype_recessive	-9.6911	0	0
1	0.0441	4.408	Phenotype_recessive	-9.6613	0	0
1	0.0447	4.469	Phenotype_recessive	-9.6419	0	0
1	0.0453	4.53	Phenotype_recessive	-9.632	0	0
1	0.0459	4.591	Phenotype_recessive	-9.6308	0	0
1	0.0459	4.595	Phenotype_recessive	-9.6306	0	0
1	0.046	4.598	Phenotype_recessive	-9.6304	0	0
1	0.046	4.602	Phenotype_recessive	-9.6303	0	0
1	0.0461	4.606	Phenotype_recessive	-9.6301	0	0
1	0.0461	4.612	Phenotype_recessive	-9.6299	0	0
1	0.0462	4.617	Phenotype_recessive	-9.6298	0	0
1	0.0462	4.623	Phenotype_recessive	-9.6297	0	0
1	0.0463	4.628	Phenotype_recessive	-9.6297	0	0
1	0.0463	4.63	Phenotype_recessive	-9.6297	0	0
1	0.0463	4.632	Phenotype_recessive	-9.6297	0	0
1	0.0463	4.633	Phenotype_recessive	-9.6297	0	0
1	0.0464	4.635	Phenotype_recessive	-9.6298	0	0
1	0.0465	4.647	Phenotype_recessive	-9.6298	0	0
1	0.0466	4.658	Phenotype_recessive	-9.6301	0	0
1	0.0467	4.669	Phenotype_recessive	-9.6308	0	0
1	0.0468	4.681	Phenotype_recessive	-9.6317	0	0
1	0.0469	4.686	Phenotype_recessive	-9.6321	0	0
1	0.0469	4.691	Phenotype_recessive	-9.6325	0	0
1	0.047	4.696	Phenotype_recessive	-9.633	0	0
1	0.047	4.701	Phenotype_recessive	-9.6336	0	0
1	0.047	4.704	Phenotype_recessive	-9.6338	0	0
1	0.0471	4.706	Phenotype_recessive	-9.6341	0	0
1	0.0471	4.709	Phenotype_recessive	-9.6345	0	0
1	0.0471	4.712	Phenotype_recessive	-9.6348	0	0
1	0.0472	4.715	Phenotype_recessive	-9.6352	0	0
1	0.0472	4.718	Phenotype_recessive	-9.6357	0	0
1	0.0472	4.722	Phenotype_recessive	-9.6361	0	0
1	0.0473	4.725	Phenotype_recessive	-9.6366	0	0
1	0.0473	4.726	Phenotype_recessive	-9.6367	0	0
1	0.0473	4.726	Phenotype_recessive	-9.6368	0	0
1	0.0473	4.726	Phenotype_recessive	-9.6368	0	0
1	0.0473	4.727	Phenotype_recessive	-9.6369	0	0
1	0.0473	4.732	Phenotype_recessive	-9.6377	0	0
1	0.0474	4.738	Phenotype_recessive	-9.6385	0	0
1	0.0474	4.743	Phenotype_recessive	-9.6394	0	0
1	0.0475	4.748	Phenotype_recessive	-9.6404	0	0
1	0.0475	4.751	Phenotype_recessive	-9.6408	0	0
1	0.0475	4.753	Phenotype_recessive	-9.6413	0	0
1	0.0476	4.755	Phenotype_recessive	-9.6417	0	0
1	0.0476	4.757	Phenotype_recessive	-9.6422	0	0
1	0.0476	4.759	Phenotype_recessive	-9.6425	0	0
1	0.0476	4.761	Phenotype_recessive	-9.6428	0	0
1	0.0476	4.763	Phenotype_recessive	-9.6432	0	0
1	0.0476	4.764	Phenotype_recessive	-9.6436	0	0
1	0.0478	4.776	Phenotype_recessive	-9.6459	0	0
1	0.0479	4.787	Phenotype_recessive	-9.6485	0	0
1	0.048	4.798	Phenotype_recessive	-9.6514	0	0
1	0.0481	4.809	Phenotype_recessive	-9.6547	0	0
1	0.0482	4.816	Phenotype_recessive	-9.6566	0	0
1	0.0482	4.823	Phenotype_recessive	-9.6586	0	0
1	0.0483	4.83	Phenotype_recessive	-9.6607	0	0
1	0.0484	4.836	Phenotype_recessive	-9.663	0	0
1	0.0486	4.855	Phenotype_recessive	-9.6692	0	0
1	0.0487	4.874	Phenotype_recessive	-9.6764	0	0
1	0.0489	4.893	Phenotype_recessive	-9.6846	0	0
1	0.0491	4.912	Phenotype_recessive	-9.6939	0	0
1	0.0491	4.912	Phenotype_recessive	-9.6939	0	0
1	0.0491	4.913	Phenotype_recessive	-9.6939	0	0
1	0.0491	4.913	Phenotype_recessive	-9.6939	0	0
1	0.0491	4.914	Phenotype_recessive	-9.6939	0	0
1	0.0491	4.914	Phenotype_recessive	-9.6939	0	0
1	0.0491	4.914	Phenotype_recessive	-9.6939	0	0
1	0.0491	4.915	Phenotype_recessive	-9.6939	0	0
1	0.0492	4.915	Phenotype_recessive	-9.6939	0	0
1	0.0494	4.938	Phenotype_recessive	-9.6896	0	0
1	0.0496	4.961	Phenotype_recessive	-9.6867	0	0
1	0.0498	4.983	Phenotype_recessive	-9.6851	0	0
1	0.0501	5.006	Phenotype_recessive	-9.6848	0	0
1	0.0501	5.008	Phenotype_recessive	-9.6848	0	0
1	0.0501	5.01	Phenotype_recessive	-9.6848	0	0
1	0.0501	5.012	Phenotype_recessive	-9.6847	0	0
1	0.0501	5.014	Phenotype_recessive	-9.6847	0	0
1	0.0502	5.017	Phenotype_recessive	-9.6847	0	0
1	0.0502	5.02	Phenotype_recessive	-9.6847	0	0
1	0.0502	5.024	Phenotype_recessive	-9.6847	0	0
1	0.0503	5.027	Phenotype_recessive	-9.6847	0	0
1	0.0503	5.028	Phenotype_recessive	-9.6848	0	0
1	0.0503	5.029	Phenotype_recessive	-9.6848	0	0
1	0.0503	5.029	Phenotype_recessive	-9.6848	0	0
1	0.0503	5.03	Phenotype_recessive	-9.6848	0	0
1	0.0503	5.031	Phenotype_recessive	-9.6848	0	0
1	0.0503	5.032	Phenotype_recessive	-9.6848	0	0
1	0.0503	5.032	Phenotype_recessive	-9.6848	0	0
1	0.0503	5.033	Phenotype_recessive	-9.6849	0	0
1	0.0504	5.036	Phenotype_recessive	-9.6849	0	0
1	0.0504	5.038	Phenotype_recessive	-9.685	0	0
1	0.0504	5.041	Phenotype_recessive	-9.6851	0	0
1	0.0504	5.044	Phenotype_recessive	-9.6852	0	0
1	0.0505	5.048	Phenotype_recessive	-9.6854	0	0
1	0.0505	5.052	Phenotype_recessive	-9.6856	0	0
1	0.0506	5.055	Phenotype_recessive	-9.6858	0	0
1	0.0506	5.059	Phenotype_recessive	-9.6861	0	0
1	0.0508	5.075	Phenotype_recessive	-9.6871	0	0
1	0.0509	5.091	Phenotype_recessive	-9.6887	0	0
1	0.0511	5.107	Phenotype_recessive	-9.691	0	0
1	0.0512	5.123	Phenotype_recessive	-9.6939	0	0
1	0.0513	5.127	Phenotype_recessive	-9.6939	0	0
1	0.0513	5.132	Phenotype_recessive	-9.6938	0	0
1	0.0514	5.137	Phenotype_recessive	-9.6939	0	0
1	0.0514	5.142	Phenotype_recessive	-9.6939	0	0
1	0.0519	5.187	Phenotype_recessive	-9.6857	0	0
1	0.0523	5.233	Phenotype_recessive	-9.683	0	0
1	0.0528	5.279	Phenotype_recessive	-9.6857	0	0
1	0.0533	5.325	Phenotype_recessive	-9.6939	0	0
1	0.0533	5.33	Phenotype_recessive	-9.6939	0	0
1	0.0534	5.335	Phenotype_recessive	-9.6938	0	0
1	0.0534	5.34	Phenotype_recessive	-9.6939	0	0
1	0.0534	5.345	Phenotype_recessive	-9.6939	0	0
1	0.0535	5.349	Phenotype_recessive	-9.6938	0	0
1	0.0535	5.353	Phenotype_recessive	-9.6937	0	0
1	0.0536	5.357	Phenotype_recessive	-9.6937	0	0
1	0.0536	5.362	Phenotype_recessive	-9.6937	0	0
1	0.0537	5.37	Phenotype_recessive	-9.6932	0	0
1	0.0538	5.378	Phenotype_recessive	-9.6928	0	0
1	0.0539	5.387	Phenotype_recessive	-9.6926	0	0
1	0.0539	5.395	Phenotype_recessive	-9.6926	0	0
1	0.054	5.399	Phenotype_recessive	-9.6926	0	0
1	0.054	5.402	Phenotype_recessive	-9.6925	0	0
1	0.0541	5.406	Phenotype_recessive	-9.6926	0	0
1	0.0541	5.41	Phenotype_recessive	-9.6926	0	0
1	0.0541	5.412	Phenotype_recessive	-9.6927	0	0
1	0.0542	5.415	Phenotype_recessive	-9.6927	0	0
1	0.0542	5.418	Phenotype_recessive	-9.6928	0	0
1	0.0542	5.421	Phenotype_recessive	-9.6929	0	0
1	0.0543	5.426	Phenotype_recessive	-9.693	0	0
1	0.0543	5.431	Phenotype_recessive	-9.6933	0	0
1	0.0544	5.436	Phenotype_recessive	-9.6936	0	0
1	0.0544	5.441	Phenotype_recessive	-9.6939	0	0
1	0.0544	5.444	Phenotype_recessive	-9.6939	0	0
1	0.0545	5.447	Phenotype_recessive	-9.6939	0	0
1	0.0545	5.45	Phenotype_recessive	-9.6939	0	0
1	0.0545	5.453	Phenotype_recessive	-9.6939	0	0
1	0.0546	5.458	Phenotype_recessive	-9.6939	0	0
1	0.0546	5.462	Phenotype_recessive	-9.6938	0	0
1	0.0547	5.467	Phenotype_recessive	-9.6939	0	0
1	0.0547	5.472	Phenotype_recessive	-9.6939	0	0
1	0.0547	5.473	Phenotype_recessive	-9.6939	0	0
1	0.0547	5.474	Phenotype_recessive	-9.6939	0	0
1	0.0548	5.476	Phenotype_recessive	-9.6939	0	0
1	0.0548	5.477	Phenotype_recessive	-9.6939	0	0
1	0.0548	5.479	Phenotype_recessive	-9.6938	0	0
1	0.0548	5.482	Phenotype_recessive	-9.6937	0	0
1	0.0548	5.484	Phenotype_recessive	-9.6936	0	0
1	0.0549	5.486	Phenotype_recessive	-9.6935	0	0
1	0.055	5.495	Phenotype_recessive	-9.6929	0	0
1	0.055	5.505	Phenotype_recessive	-9.6925	0	0
1	0.0551	5.514	Phenotype_recessive	-9.6923	0	0
1	0.0552	5.523	Phenotype_recessive	-9.6924	0	0
1	0.0553	5.529	Phenotype_recessive	-9.6922	0	0
1	0.0554	5.535	Phenotype_recessive	-9.6922	0	0
1	0.0554	5.542	Phenotype_recessive	-9.6922	0	0
1	0.0555	5.548	Phenotype_recessive	-9.6923	0	0
1	0.0555	5.551	Phenotype_recessive	-9.6923	0	0
1	0.0555	5.555	Phenotype_recessive	-9.6923	0	0
1	0.0556	5.558	Phenotype_recessive	-9.6924	0	0
1	0.0556	5.562	Phenotype_recessive	-9.6925	0	0
1	0.0557	5.566	Phenotype_recessive	-9.6926	0	0
1	0.0557	5.571	Phenotype_recessive	-9.6926	0	0
1	0.0557	5.575	Phenotype_recessive	-9.6928	0	0
1	0.0558	5.579	Phenotype_recessive	-9.693	0	0
1	0.0558	5.582	Phenotype_recessive	-9.6931	0	0
1	0.0558	5.584	Phenotype_recessive	-9.6932	0	0
1	0.0559	5.587	Phenotype_recessive	-9.6933	0	0
1	0.0559	5.59	Phenotype_recessive	-9.6934	0	0
1	0.0559	5.592	Phenotype_recessive	-9.6935	0	0
1	0.056	5.595	Phenotype_recessive	-9.6936	0	0
1	0.056	5.598	Phenotype_recessive	-9.6938	0	0
1	0.056	5.601	Phenotype_recessive	-9.6939	0	0
1	0.0565	5.653	Phenotype_recessive	-9.6835	0	0
1	0.057	5.705	Phenotype_recessive	-9.6801	0	0
1	0.0576	5.756	Phenotype_recessive	-9.6835	0	0
1	0.0581	5.808	Phenotype_recessive	-9.6939	0	0
1	0.0581	5.811	Phenotype_recessive	-9.6939	0	0
1	0.0581	5.813	Phenotype_recessive	-9.6939	0	0
1	0.0582	5.816	Phenotype_recessive	-9.6939	0	0
1	0.0582	5.819	Phenotype_recessive	-9.6939	0	0
1	0.0582	5.823	Phenotype_recessive	-9.6939	0	0
1	0.0583	5.828	Phenotype_recessive	-9.6938	0	0
1	0.0583	5.833	Phenotype_recessive	-9.6939	0	0
1	0.0584	5.837	Phenotype_recessive	-9.6939	0	0
1	0.0586	5.863	Phenotype_recessive	-9.687	0	0
1	0.0589	5.889	Phenotype_recessive	-9.6818	0	0
1	0.0591	5.914	Phenotype_recessive	-9.6783	0	0
1	0.0594	5.94	Phenotype_recessive	-9.6765	0	0
1	0.0594	5.942	Phenotype_recessive	-9.6764	0	0
1	0.0594	5.943	Phenotype_recessive	-9.6763	0	0
1	0.0594	5.944	Phenotype_recessive	-9.6762	0	0
1	0.0595	5.946	Phenotype_recessive	-9.6761	0	0
1	0.0595	5.95	Phenotype_recessive	-9.6758	0	0
1	0.0595	5.954	Phenotype_recessive	-9.6755	0	0
1	0.0596	5.958	Phenotype_recessive	-9.6753	0	0
1	0.0596	5.962	Phenotype_recessive	-9.6751	0	0
1	0.0596	5.964	Phenotype_recessive	-9.675	0	0
1	0.0597	5.966	Phenotype_recessive	-9.675	0	0
1	0.0597	5.968	Phenotype_recessive	-9.6749	0	0
1	0.0597	5.97	Phenotype_recessive	-9.6748	0	0
1	0.0598	5.978	Phenotype_recessive	-9.6746	0	0
1	0.0599	5.987	Phenotype_recessive	-9.6744	0	0
1	0.06	5.995	Phenotype_recessive	-9.6745	0	0
1	0.06	6.003	Phenotype_recessive	-9.6747	0	0
1	0.0601	6.008	Phenotype_recessive	-9.6748	0	0
1	0.0601	6.012	Phenotype_recessive	-9.675	0	0
1	0.0602	6.016	Phenotype_recessive	-9.6752	0	0
1	0.0602	6.021	Phenotype_recessive	-9.6754	0	0
1	0.0603	6.029	Phenotype_recessive	-9.6758	0	0
1	0.0604	6.036	Phenotype_recessive	-9.6764	0	0
1	0.0604	6.044	Phenotype_recessive	-9.6771	0	0
1	0.0605	6.052	Phenotype_recessive	-9.6779	0	0
1	0.0607	6.074	Phenotype_recessive	-9.68	0	0
1	0.061	6.096	Phenotype_recessive	-9.6834	0	0
1	0.0612	6.118	Phenotype_recessive	-9.688	0	0
1	0.0614	6.14	Phenotype_recessive	-9.6939	0	0
1	0.0615	6.145	Phenotype_recessive	-9.6938	0	0
1	0.0615	6.151	Phenotype_recessive	-9.6938	0	0
1	0.0616	6.157	Phenotype_recessive	-9.6938	0	0
1	0.0616	6.162	Phenotype_recessive	-9.6939	0	0
1	0.0617	6.166	Phenotype_recessive	-9.6939	0	0
1	0.0617	6.169	Phenotype_recessive	-9.6939	0	0
1	0.0617	6.172	Phenotype_recessive	-9.6939	0	0
1	0.0618	6.175	Phenotype_recessive	-9.6939	0	0
1	0.062	6.202	Phenotype_recessive	-9.689	0	0
1	0.0623	6.229	Phenotype_recessive	-9.6859	0	0
1	0.0626	6.256	Phenotype_recessive	-9.6847	0	0
1	0.0628	6.283	Phenotype_recessive	-9.6853	0	0
1	0.0629	6.287	Phenotype_recessive	-9.6852	0	0
1	0.0629	6.29	Phenotype_recessive	-9.6851	0	0
1	0.0629	6.294	Phenotype_recessive	-9.685	0	0
1	0.063	6.297	Phenotype_recessive	-9.6849	0	0
1	0.063	6.299	Phenotype_recessive	-9.6849	0	0
1	0.063	6.301	Phenotype_recessive	-9.6849	0	0
1	0.063	6.303	Phenotype_recessive	-9.6848	0	0
1	0.063	6.305	Phenotype_recessive	-9.6848	0	0
1	0.0631	6.307	Phenotype_recessive	-9.6848	0	0
1	0.0631	6.31	Phenotype_recessive	-9.6847	0	0
1	0.0631	6.313	Phenotype_recessive	-9.6847	0	0
1	0.0632	6.315	Phenotype_recessive	-9.6847	0	0
1	0.0632	6.318	Phenotype_recessive	-9.6847	0	0
1	0.0632	6.32	Phenotype_recessive	-9.6847	0	0
1	0.0632	6.322	Phenotype_recessive	-9.6847	0	0
1	0.0632	6.325	Phenotype_recessive	-9.6847	0	0
1	0.0634	6.338	Phenotype_recessive	-9.6844	0	0
1	0.0635	6.352	Phenotype_recessive	-9.6845	0	0
1	0.0637	6.366	Phenotype_recessive	-9.6851	0	0
1	0.0638	6.379	Phenotype_recessive	-9.6862	0	0
1	0.0639	6.386	Phenotype_recessive	-9.6865	0	0
1	0.0639	6.392	Phenotype_recessive	-9.6868	0	0
1	0.064	6.399	Phenotype_recessive	-9.6873	0	0
1	0.0641	6.405	Phenotype_recessive	-9.6878	0	0
1	0.0641	6.411	Phenotype_recessive	-9.6882	0	0
1	0.0642	6.416	Phenotype_recessive	-9.6886	0	0
1	0.0642	6.422	Phenotype_recessive	-9.6891	0	0
1	0.0643	6.427	Phenotype_recessive	-9.6897	0	0
1	0.0643	6.432	Phenotype_recessive	-9.6901	0	0
1	0.0644	6.437	Phenotype_recessive	-9.6906	0	0
1	0.0644	6.442	Phenotype_recessive	-9.6911	0	0
1	0.0645	6.447	Phenotype_recessive	-9.6917	0	0
1	0.0645	6.449	Phenotype_recessive	-9.6919	0	0
1	0.0645	6.45	Phenotype_recessive	-9.6921	0	0
1	0.0645	6.452	Phenotype_recessive	-9.6923	0	0
1	0.0645	6.454	Phenotype_recessive	-9.6925	0	0
1	0.0646	6.457	Phenotype_recessive	-9.6927	0	0
1	0.0646	6.46	Phenotype_recessive	-9.6929	0	0
1	0.0646	6.463	Phenotype_recessive	-9.6932	0	0
1	0.0647	6.466	Phenotype_recessive	-9.6935	0	0
1	0.0647	6.468	Phenotype_recessive	-9.6934	0	0
1	0.0647	6.47	Phenotype_recessive	-9.6933	0	0
1	0.0647	6.472	Phenotype_recessive	-9.6933	0	0
1	0.0647	6.474	Phenotype_recessive	-9.6933	0	0
1	0.0648	6.478	Phenotype_recessive	-9.6932	0	0
1	0.0648	6.482	Phenotype_recessive	-9.6932	0	0
1	0.0649	6.486	Phenotype_recessive	-9.6932	0	0
1	0.0649	6.49	Phenotype_recessive	-9.6932	0	0
1	0.065	6.496	Phenotype_recessive	-9.6933	0	0
1	0.065	6.501	Phenotype_recessive	-9.6934	0	0
1	0.0651	6.507	Phenotype_recessive	-9.6936	0	0
1	0.0651	6.512	Phenotype_recessive	-9.6939	0	0
1	0.0651	6.514	Phenotype_recessive	-9.6938	0	0
1	0.0652	6.516	Phenotype_recessive	-9.6938	0	0
1	0.0652	6.518	Phenotype_recessive	-9.6938	0	0
1	0.0652	6.52	Phenotype_recessive	-9.6938	0	0
1	0.0652	6.525	Phenotype_recessive	-9.6938	0	0
1	0.0653	6.53	Phenotype_recessive	-9.6938	0	0
1	0.0653	6.534	Phenotype_recessive	-9.6938	0	0
1	0.0654	6.539	Phenotype_recessive	-9.6939	0	0
1	0.0654	6.542	Phenotype_recessive	-9.6939	0	0
1	0.0655	6.545	Phenotype_recessive	-9.6939	0	0
1	0.0655	6.548	Phenotype_recessive	-9.6939	0	0
1	0.0655	6.551	Phenotype_recessive	-9.6939	0	0
1	0.0655	6.552	Phenotype_recessive	-9.6939	0	0
1	0.0655	6.553	Phenotype_recessive	-9.6939	0	0
1	0.0655	6.554	Phenotype_recessive	-9.6939	0	0
1	0.0655	6.554	Phenotype_recessive	-9.6939	0	0
1	0.0656	6.558	Phenotype_recessive	-9.6939	0	0
1	0.0656	6.561	Phenotype_recessive	-9.6939	0	0
1	0.0656	6.564	Phenotype_recessive	-9.6939	0	0
1	0.0657	6.568	Phenotype_recessive	-9.6939	0	0
1	0.0657	6.571	Phenotype_recessive	-9.6936	0	0
1	0.0657	6.574	Phenotype_recessive	-9.6933	0	0
1	0.0658	6.578	Phenotype_recessive	-9.693	0	0
1	0.0658	6.581	Phenotype_recessive	-9.6927	0	0
1	0.0659	6.589	Phenotype_recessive	-9.6919	0	0
1	0.066	6.597	Phenotype_recessive	-9.6912	0	0
1	0.0661	6.606	Phenotype_recessive	-9.6908	0	0
1	0.0661	6.614	Phenotype_recessive	-9.6905	0	0
1	0.0662	6.617	Phenotype_recessive	-9.6902	0	0
1	0.0662	6.621	Phenotype_recessive	-9.69	0	0
1	0.0662	6.624	Phenotype_recessive	-9.6899	0	0
1	0.0663	6.628	Phenotype_recessive	-9.6898	0	0
1	0.0663	6.63	Phenotype_recessive	-9.6897	0	0
1	0.0663	6.632	Phenotype_recessive	-9.6896	0	0
1	0.0663	6.634	Phenotype_recessive	-9.6895	0	0
1	0.0664	6.636	Phenotype_recessive	-9.6894	0	0
1	0.0665	6.646	Phenotype_recessive	-9.6889	0	0
1	0.0666	6.656	Phenotype_recessive	-9.6886	0	0
1	0.0667	6.665	Phenotype_recessive	-9.6885	0	0
1	0.0668	6.675	Phenotype_recessive	-9.6887	0	0
1	0.0668	6.678	Phenotype_recessive	-9.6887	0	0
1	0.0668	6.68	Phenotype_recessive	-9.6887	0	0
1	0.0668	6.682	Phenotype_recessive	-9.6887	0	0
1	0.0668	6.685	Phenotype_recessive	-9.6887	0	0
1	0.0669	6.687	Phenotype_recessive	-9.6887	0	0
1	0.0669	6.689	Phenotype_recessive	-9.6887	0	0
1	0.0669	6.691	Phenotype_recessive	-9.6887	0	0
1	0.0669	6.693	Phenotype_recessive	-9.6888	0	0
1	0.067	6.698	Phenotype_recessive	-9.6888	0	0
1	0.067	6.702	Phenotype_recessive	-9.6889	0	0
1	0.0671	6.706	Phenotype_recessive	-9.689	0	0
1	0.0671	6.711	Phenotype_recessive	-9.6891	0	0
1	0.0672	6.717	Phenotype_recessive	-9.6892	0	0
1	0.0672	6.724	Phenotype_recessive	-9.6895	0	0
1	0.0673	6.73	Phenotype_recessive	-9.6898	0	0
1	0.0674	6.736	Phenotype_recessive	-9.6902	0	0
1	0.0674	6.737	Phenotype_recessive	-9.6902	0	0
1	0.0674	6.737	Phenotype_recessive	-9.6902	0	0
1	0.0674	6.737	Phenotype_recessive	-9.6902	0	0
1	0.0674	6.737	Phenotype_recessive	-9.6902	0	0
1	0.0675	6.75	Phenotype_recessive	-9.6887	0	0
1	0.0676	6.763	Phenotype_recessive	-9.6875	0	0
1	0.0678	6.775	Phenotype_recessive	-9.6867	0	0
1	0.0679	6.788	Phenotype_recessive	-9.6863	0	0
1	0.0679	6.79	Phenotype_recessive	-9.6861	0	0
1	0.0679	6.792	Phenotype_recessive	-9.6858	0	0
1	0.0679	6.795	Phenotype_recessive	-9.6856	0	0
1	0.068	6.797	Phenotype_recessive	-9.6854	0	0
1	0.0684	6.839	Phenotype_recessive	-9.6798	0	0
1	0.0688	6.881	Phenotype_recessive	-9.6787	0	0
1	0.0692	6.922	Phenotype_recessive	-9.682	0	0
1	0.0696	6.964	Phenotype_recessive	-9.6899	0	0
1	0.0698	6.978	Phenotype_recessive	-9.6901	0	0
1	0.0699	6.992	Phenotype_recessive	-9.6909	0	0
1	0.0701	7.006	Phenotype_recessive	-9.6922	0	0
1	0.0702	7.02	Phenotype_recessive	-9.6939	0	0
1	0.0702	7.024	Phenotype_recessive	-9.6939	0	0
1	0.0703	7.029	Phenotype_recessive	-9.6938	0	0
1	0.0703	7.033	Phenotype_recessive	-9.6939	0	0
1	0.0704	7.038	Phenotype_recessive	-9.6939	0	0
1	0.0704	7.041	Phenotype_recessive	-9.6939	0	0
1	0.0704	7.044	Phenotype_recessive	-9.6939	0	0
1	0.0705	7.047	Phenotype_recessive	-9.6939	0	0
1	0.0705	7.05	Phenotype_recessive	-9.6939	0	0
1	0.0706	7.064	Phenotype_recessive	-9.6932	0	0
1	0.0708	7.079	Phenotype_recessive	-9.6929	0	0
1	0.0709	7.093	Phenotype_recessive	-9.6932	0	0
1	0.0711	7.107	Phenotype_recessive	-9.6939	0	0
1	0.0712	7.116	Phenotype_recessive	-9.6936	0	0
1	0.0713	7.125	Phenotype_recessive	-9.6935	0	0
1	0.0713	7.134	Phenotype_recessive	-9.6936	0	0
1	0.0714	7.143	Phenotype_recessive	-9.6939	0	0
1	0.0715	7.151	Phenotype_recessive	-9.6937	0	0
1	0.0716	7.16	Phenotype_recessive	-9.6936	0	0
1	0.0717	7.168	Phenotype_recessive	-9.6937	0	0
1	0.0718	7.176	Phenotype_recessive	-9.6939	0	0
1	0.0718	7.178	Phenotype_recessive	-9.6939	0	0
1	0.0718	7.18	Phenotype_recessive	-9.6939	0	0
1	0.0718	7.182	Phenotype_recessive	-9.6939	0	0
1	0.0718	7.183	Phenotype_recessive	-9.6939	0	0
1	0.0719	7.188	Phenotype_recessive	-9.6939	0	0
1	0.0719	7.192	Phenotype_recessive	-9.6938	0	0
1	0.072	7.197	Phenotype_recessive	-9.6939	0	0
1	0.072	7.201	Phenotype_recessive	-9.6939	0	0
1	0.0721	7.208	Phenotype_recessive	-9.6937	0	0
1	0.0722	7.216	Phenotype_recessive	-9.6937	0	0
1	0.0722	7.223	Phenotype_recessive	-9.6937	0	0
1	0.0723	7.23	Phenotype_recessive	-9.6939	0	0
1	0.0723	7.233	Phenotype_recessive	-9.6939	0	0
1	0.0724	7.235	Phenotype_recessive	-9.6939	0	0
1	0.0724	7.238	Phenotype_recessive	-9.6939	0	0
1	0.0724	7.24	Phenotype_recessive	-9.6939	0	0
1	0.0724	7.244	Phenotype_recessive	-9.6939	0	0
1	0.0725	7.248	Phenotype_recessive	-9.6939	0	0
1	0.0725	7.252	Phenotype_recessive	-9.6939	0	0
1	0.0726	7.255	Phenotype_recessive	-9.6939	0	0
1	0.0726	7.256	Phenotype_recessive	-9.6939	0	0
1	0.0726	7.257	Phenotype_recessive	-9.6939	0	0
1	0.0726	7.258	Phenotype_recessive	-9.6939	0	0
1	0.0726	7.259	Phenotype_recessive	-9.6939	0	0
1	0.0726	7.264	Phenotype_recessive	-9.6938	0	0
1	0.0727	7.27	Phenotype_recessive	-9.6938	0	0
1	0.0728	7.276	Phenotype_recessive	-9.6938	0	0
1	0.0728	7.281	Phenotype_recessive	-9.6939	0	0
1	0.073	7.295	Phenotype_recessive	-9.6932	0	0
1	0.0731	7.309	Phenotype_recessive	-9.6929	0	0
1	0.0732	7.324	Phenotype_recessive	-9.6932	0	0
1	0.0734	7.338	Phenotype_recessive	-9.6939	0	0
1	0.0734	7.343	Phenotype_recessive	-9.6938	0	0
1	0.0735	7.348	Phenotype_recessive	-9.6938	0	0
1	0.0735	7.353	Phenotype_recessive	-9.6938	0	0
1	0.0736	7.358	Phenotype_recessive	-9.6939	0	0
1	0.0737	7.374	Phenotype_recessive	-9.693	0	0
1	0.0739	7.39	Phenotype_recessive	-9.6926	0	0
1	0.0741	7.406	Phenotype_recessive	-9.693	0	0
1	0.0742	7.422	Phenotype_recessive	-9.6939	0	0
1	0.0744	7.439	Phenotype_recessive	-9.6921	0	0
1	0.0746	7.457	Phenotype_recessive	-9.6911	0	0
1	0.0747	7.475	Phenotype_recessive	-9.6909	0	0
1	0.0749	7.493	Phenotype_recessive	-9.6915	0	0
1	0.075	7.498	Phenotype_recessive	-9.6914	0	0
1	0.075	7.503	Phenotype_recessive	-9.6914	0	0
1	0.0751	7.508	Phenotype_recessive	-9.6915	0	0
1	0.0751	7.513	Phenotype_recessive	-9.6916	0	0
1	0.0752	7.515	Phenotype_recessive	-9.6917	0	0
1	0.0752	7.517	Phenotype_recessive	-9.6917	0	0
1	0.0752	7.518	Phenotype_recessive	-9.6917	0	0
1	0.0752	7.52	Phenotype_recessive	-9.6918	0	0
1	0.0753	7.528	Phenotype_recessive	-9.6918	0	0
1	0.0754	7.536	Phenotype_recessive	-9.692	0	0
1	0.0754	7.544	Phenotype_recessive	-9.6923	0	0
1	0.0755	7.552	Phenotype_recessive	-9.6929	0	0
1	0.0755	7.552	Phenotype_recessive	-9.6929	0	0
1	0.0755	7.553	Phenotype_recessive	-9.6929	0	0
1	0.0755	7.554	Phenotype_recessive	-9.6929	0	0
1	0.0755	7.554	Phenotype_recessive	-9.693	0	0
1	0.0756	7.558	Phenotype_recessive	-9.6931	0	0
1	0.0756	7.563	Phenotype_recessive	-9.6934	0	0
1	0.0757	7.567	Phenotype_recessive	-9.6936	0	0
1	0.0757	7.571	Phenotype_recessive	-9.6939	0	0
1	0.0757	7.573	Phenotype_recessive	-9.6939	0	0
1	0.0757	7.575	Phenotype_recessive	-9.6939	0	0
1	0.0758	7.577	Phenotype_recessive	-9.6939	0	0
1	0.0758	7.579	Phenotype_recessive	-9.6939	0	0
1	0.0759	7.588	Phenotype_recessive	-9.6926	0	0
1	0.076	7.598	Phenotype_recessive	-9.6915	0	0
1	0.0761	7.608	Phenotype_recessive	-9.6907	0	0
1	0.0762	7.618	Phenotype_recessive	-9.6901	0	0
1	0.0764	7.64	Phenotype_recessive	-9.6873	0	0
1	0.0766	7.663	Phenotype_recessive	-9.6858	0	0
1	0.0768	7.685	Phenotype_recessive	-9.6855	0	0
1	0.0771	7.707	Phenotype_recessive	-9.6866	0	0
1	0.0771	7.711	Phenotype_recessive	-9.6865	0	0
1	0.0771	7.714	Phenotype_recessive	-9.6865	0	0
1	0.0772	7.717	Phenotype_recessive	-9.6866	0	0
1	0.0772	7.721	Phenotype_recessive	-9.6866	0	0
1	0.0772	7.723	Phenotype_recessive	-9.6866	0	0
1	0.0773	7.725	Phenotype_recessive	-9.6867	0	0
1	0.0773	7.727	Phenotype_recessive	-9.6867	0	0
1	0.0773	7.729	Phenotype_recessive	-9.6867	0	0
1	0.0773	7.732	Phenotype_recessive	-9.6868	0	0
1	0.0773	7.735	Phenotype_recessive	-9.6868	0	0
1	0.0774	7.737	Phenotype_recessive	-9.6869	0	0
1	0.0774	7.74	Phenotype_recessive	-9.687	0	0
1	0.0775	7.752	Phenotype_recessive	-9.687	0	0
1	0.0776	7.763	Phenotype_recessive	-9.6874	0	0
1	0.0777	7.774	Phenotype_recessive	-9.6881	0	0
1	0.0779	7.786	Phenotype_recessive	-9.6892	0	0
1	0.0779	7.793	Phenotype_recessive	-9.6895	0	0
1	0.078	7.8	Phenotype_recessive	-9.69	0	0
1	0.0781	7.807	Phenotype_recessive	-9.6906	0	0
1	0.0781	7.814	Phenotype_recessive	-9.6914	0	0
1	0.0782	7.816	Phenotype_recessive	-9.6916	0	0
1	0.0782	7.817	Phenotype_recessive	-9.6917	0	0
1	0.0782	7.819	Phenotype_recessive	-9.6919	0	0
1	0.0782	7.821	Phenotype_recessive	-9.6921	0	0
1	0.0782	7.824	Phenotype_recessive	-9.6923	0	0
1	0.0783	7.826	Phenotype_recessive	-9.6926	0	0
1	0.0783	7.829	Phenotype_recessive	-9.6929	0	0
1	0.0783	7.832	Phenotype_recessive	-9.6932	0	0
1	0.0783	7.834	Phenotype_recessive	-9.6934	0	0
1	0.0784	7.835	Phenotype_recessive	-9.6935	0	0
1	0.0784	7.837	Phenotype_recessive	-9.6937	0	0
1	0.0784	7.839	Phenotype_recessive	-9.6939	0	0
1	0.0784	7.84	Phenotype_recessive	-9.6939	0	0
1	0.0784	7.842	Phenotype_recessive	-9.6939	0	0
1	0.0784	7.843	Phenotype_recessive	-9.6938	0	0
1	0.0784	7.845	Phenotype_recessive	-9.6938	0	0
1	0.0785	7.85	Phenotype_recessive	-9.6937	0	0
1	0.0785	7.854	Phenotype_recessive	-9.6936	0	0
1	0.0786	7.859	Phenotype_recessive	-9.6936	0	0
1	0.0786	7.864	Phenotype_recessive	-9.6937	0	0
1	0.0786	7.864	Phenotype_recessive	-9.6937	0	0
1	0.0786	7.865	Phenotype_recessive	-9.6937	0	0
1	0.0787	7.865	Phenotype_recessive	-9.6937	0	0
1	0.0787	7.865	Phenotype_recessive	-9.6937	0	0
1	0.0787	7.872	Phenotype_recessive	-9.6936	0	0
1	0.0788	7.878	Phenotype_recessive	-9.6936	0	0
1	0.0788	7.884	Phenotype_recessive	-9.6937	0	0
1	0.0789	7.89	Phenotype_recessive	-9.6939	0	0
1	0.0789	7.892	Phenotype_recessive	-9.6938	0	0
1	0.0789	7.895	Phenotype_recessive	-9.6938	0	0
1	0.079	7.897	Phenotype_recessive	-9.6937	0	0
1	0.079	7.899	Phenotype_recessive	-9.6936	0	0
1	0.079	7.901	Phenotype_recessive	-9.6935	0	0
1	0.079	7.904	Phenotype_recessive	-9.6934	0	0
1	0.0791	7.907	Phenotype_recessive	-9.6934	0	0
1	0.0791	7.91	Phenotype_recessive	-9.6933	0	0
1	0.0791	7.911	Phenotype_recessive	-9.6933	0	0
1	0.0791	7.913	Phenotype_recessive	-9.6933	0	0
1	0.0791	7.914	Phenotype_recessive	-9.6933	0	0
1	0.0792	7.916	Phenotype_recessive	-9.6932	0	0
1	0.0792	7.918	Phenotype_recessive	-9.6932	0	0
1	0.0792	7.921	Phenotype_recessive	-9.6932	0	0
1	0.0792	7.924	Phenotype_recessive	-9.6932	0	0
1	0.0793	7.926	Phenotype_recessive	-9.6933	0	0
1	0.0793	7.928	Phenotype_recessive	-9.6933	0	0
1	0.0793	7.931	Phenotype_recessive	-9.6933	0	0
1	0.0793	7.933	Phenotype_recessive	-9.6934	0	0
1	0.0794	7.935	Phenotype_recessive	-9.6935	0	0
1	0.0794	7.938	Phenotype_recessive	-9.6935	0	0
1	0.0794	7.941	Phenotype_recessive	-9.6937	0	0
1	0.0794	7.944	Phenotype_recessive	-9.6938	0	0
1	0.0795	7.948	Phenotype_recessive	-9.6939	0	0
1	0.0795	7.951	Phenotype_recessive	-9.6939	0	0
1	0.0795	7.954	Phenotype_recessive	-9.6939	0	0
1	0.0796	7.957	Phenotype_recessive	-9.6939	0	0
1	0.0796	7.961	Phenotype_recessive	-9.6939	0	0
1	0.0796	7.961	Phenotype_recessive	-9.6939	0	0
1	0.0796	7.961	Phenotype_recessive	-9.6939	0	0
1	0.0796	7.961	Phenotype_recessive	-9.6939	0	0
1	0.0796	7.961	Phenotype_recessive	-9.6939	0	0
1	0.0797	7.966	Phenotype_recessive	-9.6939	0	0
1	0.0797	7.97	Phenotype_recessive	-9.6938	0	0
1	0.0798	7.975	Phenotype_recessive	-9.6939	0	0
1	0.0798	7.98	Phenotype_recessive	-9.6939	0	0
1	0.0799	7.985	Phenotype_recessive	-9.6936	0	0
1	0.0799	7.991	Phenotype_recessive	-9.6933	0	0
1	0.08	7.996	Phenotype_recessive	-9.6932	0	0
1	0.08	8.002	Phenotype_recessive	-9.6931	0	0
1	0.0801	8.013	Phenotype_recessive	-9.6928	0	0
1	0.0802	8.025	Phenotype_recessive	-9.6928	0	0
1	0.0804	8.036	Phenotype_recessive	-9.6932	0	0
1	0.0805	8.048	Phenotype_recessive	-9.6939	0	0
1	0.0805	8.05	Phenotype_recessive	-9.6939	0	0
1	0.0805	8.051	Phenotype_recessive	-9.6939	0	0
1	0.0805	8.053	Phenotype_recessive	-9.6939	0	0
1	0.0805	8.054	Phenotype_recessive	-9.6939	0	0
1	0.0806	8.059	Phenotype_recessive	-9.6922	0	0
1	0.0806	8.064	Phenotype_recessive	-9.6905	0	0
1	0.0807	8.068	Phenotype_recessive	-9.6889	0	0
1	0.0807	8.073	Phenotype_recessive	-9.6873	0	0
1	0.0808	8.076	Phenotype_recessive	-9.6863	0	0
1	0.0808	8.079	Phenotype_recessive	-9.6854	0	0
1	0.0808	8.082	Phenotype_recessive	-9.6844	0	0
1	0.0808	8.085	Phenotype_recessive	-9.6835	0	0
1	0.0819	8.185	Phenotype_recessive	-9.6483	0	0
1	0.0829	8.285	Phenotype_recessive	-9.6385	0	0
1	0.0839	8.386	Phenotype_recessive	-9.6532	0	0
1	0.0849	8.486	Phenotype_recessive	-9.6939	0	0
1	0.0849	8.489	Phenotype_recessive	-9.6939	0	0
1	0.0849	8.492	Phenotype_recessive	-9.6939	0	0
1	0.0849	8.495	Phenotype_recessive	-9.6939	0	0
1	0.085	8.498	Phenotype_recessive	-9.6939	0	0
1	0.0852	8.517	Phenotype_recessive	-9.6925	0	0
1	0.0854	8.536	Phenotype_recessive	-9.6921	0	0
1	0.0855	8.555	Phenotype_recessive	-9.6925	0	0
1	0.0857	8.573	Phenotype_recessive	-9.6939	0	0
1	0.0858	8.579	Phenotype_recessive	-9.6938	0	0
1	0.0858	8.584	Phenotype_recessive	-9.6938	0	0
1	0.0859	8.59	Phenotype_recessive	-9.6938	0	0
1	0.086	8.595	Phenotype_recessive	-9.6939	0	0
1	0.086	8.6	Phenotype_recessive	-9.6939	0	0
1	0.086	8.604	Phenotype_recessive	-9.6938	0	0
1	0.0861	8.609	Phenotype_recessive	-9.6939	0	0
1	0.0861	8.614	Phenotype_recessive	-9.6939	0	0
1	0.0862	8.618	Phenotype_recessive	-9.6939	0	0
1	0.0862	8.622	Phenotype_recessive	-9.6939	0	0
1	0.0863	8.626	Phenotype_recessive	-9.6939	0	0
1	0.0863	8.63	Phenotype_recessive	-9.6939	0	0
1	0.0863	8.635	Phenotype_recessive	-9.6939	0	0
1	0.0864	8.639	Phenotype_recessive	-9.6938	0	0
1	0.0864	8.644	Phenotype_recessive	-9.6939	0	0
1	0.0865	8.648	Phenotype_recessive	-9.6939	0	0
1	0.0865	8.651	Phenotype_recessive	-9.6939	0	0
1	0.0865	8.653	Phenotype_recessive	-9.6939	0	0
1	0.0866	8.656	Phenotype_recessive	-9.6939	0	0
1	0.0866	8.659	Phenotype_recessive	-9.6939	0	0
1	0.0868	8.676	Phenotype_recessive	-9.6928	0	0
1	0.0869	8.694	Phenotype_recessive	-9.6924	0	0
1	0.0871	8.711	Phenotype_recessive	-9.6928	0	0
1	0.0873	8.729	Phenotype_recessive	-9.6939	0	0
1	0.0873	8.734	Phenotype_recessive	-9.6938	0	0
1	0.0874	8.74	Phenotype_recessive	-9.6938	0	0
1	0.0875	8.746	Phenotype_recessive	-9.6938	0	0
1	0.0875	8.752	Phenotype_recessive	-9.6939	0	0
1	0.0875	8.754	Phenotype_recessive	-9.6939	0	0
1	0.0876	8.757	Phenotype_recessive	-9.6939	0	0
1	0.0876	8.76	Phenotype_recessive	-9.6939	0	0
1	0.0876	8.763	Phenotype_recessive	-9.6939	0	0
1	0.0877	8.766	Phenotype_recessive	-9.6939	0	0
1	0.0877	8.769	Phenotype_recessive	-9.6939	0	0
1	0.0877	8.772	Phenotype_recessive	-9.6939	0	0
1	0.0878	8.775	Phenotype_recessive	-9.6939	0	0
1	0.0878	8.778	Phenotype_recessive	-9.6939	0	0
1	0.0878	8.78	Phenotype_recessive	-9.6939	0	0
1	0.0878	8.783	Phenotype_recessive	-9.6939	0	0
1	0.0879	8.785	Phenotype_recessive	-9.6939	0	0
1	0.0879	8.789	Phenotype_recessive	-9.6937	0	0
1	0.0879	8.792	Phenotype_recessive	-9.6935	0	0
1	0.088	8.796	Phenotype_recessive	-9.6933	0	0
1	0.088	8.799	Phenotype_recessive	-9.6931	0	0
1	0.0882	8.817	Phenotype_recessive	-9.6901	0	0
1	0.0883	8.835	Phenotype_recessive	-9.6879	0	0
1	0.0885	8.853	Phenotype_recessive	-9.6866	0	0
1	0.0887	8.871	Phenotype_recessive	-9.6861	0	0
1	0.0887	8.873	Phenotype_recessive	-9.6859	0	0
1	0.0887	8.875	Phenotype_recessive	-9.6858	0	0
1	0.0888	8.876	Phenotype_recessive	-9.6856	0	0
1	0.0888	8.878	Phenotype_recessive	-9.6855	0	0
1	0.0888	8.881	Phenotype_recessive	-9.6853	0	0
1	0.0888	8.883	Phenotype_recessive	-9.6851	0	0
1	0.0889	8.886	Phenotype_recessive	-9.685	0	0
1	0.0889	8.889	Phenotype_recessive	-9.6848	0	0
1	0.0889	8.891	Phenotype_recessive	-9.6846	0	0
1	0.0889	8.894	Phenotype_recessive	-9.6845	0	0
1	0.089	8.897	Phenotype_recessive	-9.6843	0	0
1	0.089	8.9	Phenotype_recessive	-9.6842	0	0
1	0.0891	8.905	Phenotype_recessive	-9.6838	0	0
1	0.0891	8.91	Phenotype_recessive	-9.6836	0	0
1	0.0892	8.916	Phenotype_recessive	-9.6834	0	0
1	0.0892	8.921	Phenotype_recessive	-9.6833	0	0
1	0.0892	8.922	Phenotype_recessive	-9.6832	0	0
1	0.0892	8.924	Phenotype_recessive	-9.6832	0	0
1	0.0893	8.925	Phenotype_recessive	-9.6831	0	0
1	0.0893	8.926	Phenotype_recessive	-9.6831	0	0
1	0.0893	8.927	Phenotype_recessive	-9.6831	0	0
1	0.0893	8.927	Phenotype_recessive	-9.6831	0	0
1	0.0893	8.927	Phenotype_recessive	-9.6831	0	0
1	0.0893	8.927	Phenotype_recessive	-9.683	0	0
1	0.0893	8.929	Phenotype_recessive	-9.683	0	0
1	0.0893	8.931	Phenotype_recessive	-9.6829	0	0
1	0.0893	8.933	Phenotype_recessive	-9.6829	0	0
1	0.0893	8.935	Phenotype_recessive	-9.6829	0	0
1	0.0894	8.94	Phenotype_recessive	-9.6827	0	0
1	0.0894	8.945	Phenotype_recessive	-9.6826	0	0
1	0.0895	8.95	Phenotype_recessive	-9.6826	0	0
1	0.0896	8.955	Phenotype_recessive	-9.6826	0	0
1	0.0896	8.956	Phenotype_recessive	-9.6826	0	0
1	0.0896	8.957	Phenotype_recessive	-9.6826	0	0
1	0.0896	8.958	Phenotype_recessive	-9.6826	0	0
1	0.0896	8.959	Phenotype_recessive	-9.6826	0	0
1	0.0896	8.964	Phenotype_recessive	-9.6825	0	0
1	0.0897	8.97	Phenotype_recessive	-9.6825	0	0
1	0.0898	8.975	Phenotype_recessive	-9.6826	0	0
1	0.0898	8.981	Phenotype_recessive	-9.6828	0	0
1	0.0898	8.984	Phenotype_recessive	-9.6828	0	0
1	0.0899	8.987	Phenotype_recessive	-9.6829	0	0
1	0.0899	8.99	Phenotype_recessive	-9.683	0	0
1	0.0899	8.994	Phenotype_recessive	-9.6831	0	0
1	0.09	8.998	Phenotype_recessive	-9.6832	0	0
1	0.09	9.002	Phenotype_recessive	-9.6833	0	0
1	0.0901	9.007	Phenotype_recessive	-9.6835	0	0
1	0.0901	9.011	Phenotype_recessive	-9.6837	0	0
1	0.0901	9.013	Phenotype_recessive	-9.6838	0	0
1	0.0901	9.014	Phenotype_recessive	-9.6839	0	0
1	0.0902	9.016	Phenotype_recessive	-9.684	0	0
1	0.0902	9.018	Phenotype_recessive	-9.6841	0	0
1	0.0904	9.043	Phenotype_recessive	-9.6806	0	0
1	0.0907	9.069	Phenotype_recessive	-9.6789	0	0
1	0.0909	9.095	Phenotype_recessive	-9.6789	0	0
1	0.0912	9.121	Phenotype_recessive	-9.6805	0	0
1	0.0913	9.126	Phenotype_recessive	-9.6803	0	0
1	0.0913	9.131	Phenotype_recessive	-9.6801	0	0
1	0.0914	9.136	Phenotype_recessive	-9.68	0	0
1	0.0914	9.141	Phenotype_recessive	-9.68	0	0
1	0.0915	9.148	Phenotype_recessive	-9.6799	0	0
1	0.0915	9.154	Phenotype_recessive	-9.68	0	0
1	0.0916	9.16	Phenotype_recessive	-9.6801	0	0
1	0.0917	9.166	Phenotype_recessive	-9.6803	0	0
1	0.0917	9.171	Phenotype_recessive	-9.6805	0	0
1	0.0918	9.177	Phenotype_recessive	-9.6807	0	0
1	0.0918	9.182	Phenotype_recessive	-9.681	0	0
1	0.0919	9.187	Phenotype_recessive	-9.6814	0	0
1	0.0919	9.188	Phenotype_recessive	-9.6815	0	0
1	0.0919	9.189	Phenotype_recessive	-9.6815	0	0
1	0.0919	9.189	Phenotype_recessive	-9.6816	0	0
1	0.0919	9.19	Phenotype_recessive	-9.6816	0	0
1	0.0921	9.211	Phenotype_recessive	-9.683	0	0
1	0.0923	9.232	Phenotype_recessive	-9.6855	0	0
1	0.0925	9.253	Phenotype_recessive	-9.6891	0	0
1	0.0927	9.274	Phenotype_recessive	-9.6939	0	0
1	0.0928	9.277	Phenotype_recessive	-9.6938	0	0
1	0.0928	9.281	Phenotype_recessive	-9.6937	0	0
1	0.0929	9.285	Phenotype_recessive	-9.6937	0	0
1	0.0929	9.289	Phenotype_recessive	-9.6937	0	0
1	0.0929	9.294	Phenotype_recessive	-9.6936	0	0
1	0.093	9.299	Phenotype_recessive	-9.6937	0	0
1	0.093	9.304	Phenotype_recessive	-9.6938	0	0
1	0.0931	9.309	Phenotype_recessive	-9.6939	0	0
1	0.0932	9.32	Phenotype_recessive	-9.6934	0	0
1	0.0933	9.332	Phenotype_recessive	-9.6933	0	0
1	0.0934	9.343	Phenotype_recessive	-9.6934	0	0
1	0.0935	9.354	Phenotype_recessive	-9.6939	0	0
1	0.0936	9.365	Phenotype_recessive	-9.6935	0	0
1	0.0938	9.375	Phenotype_recessive	-9.6934	0	0
1	0.0939	9.386	Phenotype_recessive	-9.6935	0	0
1	0.094	9.396	Phenotype_recessive	-9.6939	0	0
1	0.0941	9.413	Phenotype_recessive	-9.6926	0	0
1	0.0943	9.43	Phenotype_recessive	-9.692	0	0
1	0.0945	9.447	Phenotype_recessive	-9.6922	0	0
1	0.0946	9.464	Phenotype_recessive	-9.6931	0	0
1	0.0947	9.468	Phenotype_recessive	-9.6933	0	0
1	0.0947	9.471	Phenotype_recessive	-9.6935	0	0
1	0.0947	9.475	Phenotype_recessive	-9.6937	0	0
1	0.0948	9.478	Phenotype_recessive	-9.6939	0	0
1	0.0948	9.48	Phenotype_recessive	-9.6937	0	0
1	0.0948	9.482	Phenotype_recessive	-9.6935	0	0
1	0.0948	9.484	Phenotype_recessive	-9.6933	0	0
1	0.0949	9.486	Phenotype_recessive	-9.6932	0	0
1	0.0949	9.49	Phenotype_recessive	-9.6928	0	0
1	0.0949	9.495	Phenotype_recessive	-9.6925	0	0
1	0.095	9.499	Phenotype_recessive	-9.6922	0	0
1	0.095	9.503	Phenotype_recessive	-9.692	0	0
1	0.0953	9.525	Phenotype_recessive	-9.6903	0	0
1	0.0955	9.548	Phenotype_recessive	-9.69	0	0
1	0.0957	9.57	Phenotype_recessive	-9.6909	0	0
1	0.0959	9.592	Phenotype_recessive	-9.6931	0	0
1	0.096	9.598	Phenotype_recessive	-9.693	0	0
1	0.096	9.603	Phenotype_recessive	-9.6929	0	0
1	0.0961	9.608	Phenotype_recessive	-9.6928	0	0
1	0.0961	9.613	Phenotype_recessive	-9.6929	0	0
1	0.0963	9.628	Phenotype_recessive	-9.6923	0	0
1	0.0964	9.643	Phenotype_recessive	-9.6923	0	0
1	0.0966	9.658	Phenotype_recessive	-9.6928	0	0
1	0.0967	9.673	Phenotype_recessive	-9.6939	0	0
1	0.0968	9.677	Phenotype_recessive	-9.6939	0	0
1	0.0968	9.681	Phenotype_recessive	-9.6938	0	0
1	0.0969	9.686	Phenotype_recessive	-9.6939	0	0
1	0.0969	9.69	Phenotype_recessive	-9.6939	0	0
1	0.097	9.703	Phenotype_recessive	-9.6928	0	0
1	0.0972	9.716	Phenotype_recessive	-9.6921	0	0
1	0.0973	9.729	Phenotype_recessive	-9.6917	0	0
1	0.0974	9.742	Phenotype_recessive	-9.6919	0	0
1	0.0976	9.765	Phenotype_recessive	-9.6897	0	0
1	0.0979	9.788	Phenotype_recessive	-9.689	0	0
1	0.0981	9.811	Phenotype_recessive	-9.6896	0	0
1	0.0983	9.835	Phenotype_recessive	-9.6917	0	0
1	0.0984	9.842	Phenotype_recessive	-9.6921	0	0
1	0.0985	9.849	Phenotype_recessive	-9.6926	0	0
1	0.0986	9.855	Phenotype_recessive	-9.6932	0	0
1	0.0986	9.862	Phenotype_recessive	-9.6939	0	0
1	0.0987	9.866	Phenotype_recessive	-9.6939	0	0
1	0.0987	9.869	Phenotype_recessive	-9.6939	0	0
1	0.0987	9.872	Phenotype_recessive	-9.6939	0	0
1	0.0988	9.876	Phenotype_recessive	-9.6939	0	0
1	0.0988	9.877	Phenotype_recessive	-9.6939	0	0
1	0.0988	9.879	Phenotype_recessive	-9.6939	0	0
1	0.0988	9.88	Phenotype_recessive	-9.6939	0	0
1	0.0988	9.882	Phenotype_recessive	-9.6939	0	0
1	0.0988	9.882	Phenotype_recessive	-9.6939	0	0
1	0.0988	9.882	Phenotype_recessive	-9.6939	0	0
1	0.0988	9.882	Phenotype_recessive	-9.6939	0	0
1	0.0988	9.882	Phenotype_recessive	-9.6939	0	0
1	0.0989	9.886	Phenotype_recessive	-9.6939	0	0
1	0.0989	9.89	Phenotype_recessive	-9.6939	0	0
1	0.0989	9.894	Phenotype_recessive	-9.6939	0	0
1	0.099	9.898	Phenotype_recessive	-9.6939	0	0
1	0.0991	9.912	Phenotype_recessive	-9.6931	0	0
1	0.0993	9.927	Phenotype_recessive	-9.6928	0	0
1	0.0994	9.942	Phenotype_recessive	-9.6931	0	0
1	0.0996	9.956	Phenotype_recessive	-9.6939	0	0
1	0.0996	9.958	Phenotype_recessive	-9.6939	0	0
1	0.0996	9.959	Phenotype_recessive	-9.6939	0	0
1	0.0996	9.96	Phenotype_recessive	-9.6939	0	0
1	0.0996	9.962	Phenotype_recessive	-9.6939	0	0
1	0.0997	9.967	Phenotype_recessive	-9.5971	0	0
1	0.0997	9.971	Phenotype_recessive	-9.518	0	0
1	0.0998	9.976	Phenotype_recessive	-9.4511	0	0
1	0.0998	9.981	Phenotype_recessive	-9.3932	0	0
1	0.0999	9.986	Phenotype_recessive	-9.4368	0	0
1	0.0999	9.991	Phenotype_recessive	-9.4854	0	0
1	0.1	9.996	Phenotype_recessive	-9.5401	0	0
1	0.1	10.002	Phenotype_recessive	-9.6028	0	0
1	0.1	10.003	Phenotype_recessive	-9.6239	0	0
1	0.1	10.005	Phenotype_recessive	-9.646	0	0
1	0.1001	10.006	Phenotype_recessive	-9.6693	0	0
1	0.1001	10.008	Phenotype_recessive	-9.6939	0	0
1	0.1001	10.013	Phenotype_recessive	-9.6939	0	0
1	0.1002	10.018	Phenotype_recessive	-9.6938	0	0
1	0.1002	10.023	Phenotype_recessive	-9.6939	0	0
1	0.1003	10.028	Phenotype_recessive	-9.6939	0	0
1	0.1004	10.037	Phenotype_recessive	-9.6933	0	0
1	0.1005	10.046	Phenotype_recessive	-9.6929	0	0
1	0.1006	10.055	Phenotype_recessive	-9.6928	0	0
1	0.1006	10.065	Phenotype_recessive	-9.6928	0	0
1	0.1007	10.074	Phenotype_recessive	-9.6923	0	0
1	0.1008	10.082	Phenotype_recessive	-9.692	0	0
1	0.1009	10.091	Phenotype_recessive	-9.6918	0	0
1	0.101	10.1	Phenotype_recessive	-9.6919	0	0
1	0.101	10.102	Phenotype_recessive	-9.6918	0	0
1	0.101	10.104	Phenotype_recessive	-9.6918	0	0
1	0.1011	10.105	Phenotype_recessive	-9.6917	0	0
1	0.1011	10.107	Phenotype_recessive	-9.6916	0	0
1	0.1014	10.138	Phenotype_recessive	-9.6768	0	0
1	0.1017	10.17	Phenotype_recessive	-9.6648	0	0
1	0.102	10.201	Phenotype_recessive	-9.6555	0	0
1	0.1023	10.232	Phenotype_recessive	-9.6487	0	0
1	0.1023	10.234	Phenotype_recessive	-9.6483	0	0
1	0.1024	10.235	Phenotype_recessive	-9.6479	0	0
1	0.1024	10.237	Phenotype_recessive	-9.6475	0	0
1	0.1024	10.239	Phenotype_recessive	-9.6471	0	0
1	0.1024	10.243	Phenotype_recessive	-9.6461	0	0
1	0.1025	10.247	Phenotype_recessive	-9.6451	0	0
1	0.1025	10.251	Phenotype_recessive	-9.6442	0	0
1	0.1026	10.256	Phenotype_recessive	-9.6434	0	0
1	0.1026	10.256	Phenotype_recessive	-7.5016	0	0
1	0.1026	10.256	Phenotype_recessive	-7.2014	0	0
1	0.1026	10.257	Phenotype_recessive	-7.0252	0	0
1	0.1026	10.257	Phenotype_recessive	-6.8998	0	0
1	0.1027	10.27	Phenotype_recessive	-6.9984	0	0
1	0.1028	10.284	Phenotype_recessive	-7.1538	0	0
1	0.103	10.297	Phenotype_recessive	-7.4383	0	0
1	0.1031	10.31	Phenotype_recessive	-9.6345	0	0
1	0.1033	10.333	Phenotype_recessive	-6.2958	0	0
1	0.1036	10.357	Phenotype_recessive	-5.9946	0	0
1	0.1038	10.38	Phenotype_recessive	-5.8188	0	0
1	0.104	10.403	Phenotype_recessive	-5.6946	0	0
1	0.1041	10.407	Phenotype_recessive	-5.6945	0	0
1	0.1041	10.411	Phenotype_recessive	-5.6945	0	0
1	0.1042	10.415	Phenotype_recessive	-5.6945	0	0
1	0.1042	10.419	Phenotype_recessive	-5.6946	0	0
1	0.1044	10.441	Phenotype_recessive	-5.6939	0	0
1	0.1046	10.464	Phenotype_recessive	-5.6937	0	0
1	0.1049	10.486	Phenotype_recessive	-5.6939	0	0
1	0.1051	10.509	Phenotype_recessive	-5.6946	0	0
1	0.1052	10.519	Phenotype_recessive	-5.6944	0	0
1	0.1053	10.529	Phenotype_recessive	-5.6944	0	0
1	0.1054	10.54	Phenotype_recessive	-5.6944	0	0
1	0.1055	10.55	Phenotype_recessive	-5.6945	0	0
1	0.1058	10.581	Phenotype_recessive	-5.6933	0	0
1	0.1061	10.611	Phenotype_recessive	-5.6929	0	0
1	0.1064	10.642	Phenotype_recessive	-5.6933	0	0
1	0.1067	10.673	Phenotype_recessive	-5.6945	0	0
1	0.1067	10.673	Phenotype_recessive	-5.6945	0	0
1	0.1067	10.673	Phenotype_recessive	-5.6945	0	0
1	0.1067	10.673	Phenotype_recessive	-5.6944	0	0
1	0.1067	10.673	Phenotype_recessive	-5.6944	0	0
1	0.1068	10.675	Phenotype_recessive	-5.6923	0	0
1	0.1068	10.678	Phenotype_recessive	-5.6902	0	0
1	0.1068	10.681	Phenotype_recessive	-5.6881	0	0
1	0.1068	10.684	Phenotype_recessive	-5.686	0	0
1	0.107	10.699	Phenotype_recessive	-5.6696	0	0
1	0.1071	10.714	Phenotype_recessive	-5.6481	0	0
1	0.1073	10.729	Phenotype_recessive	-5.6221	0	0
1	0.1074	10.744	Phenotype_recessive	-5.5921	0	0
1	0.1076	10.76	Phenotype_recessive	-5.5866	0	0
1	0.1078	10.776	Phenotype_recessive	-5.5868	0	0
1	0.1079	10.792	Phenotype_recessive	-5.593	0	0
1	0.1081	10.808	Phenotype_recessive	-5.6056	0	0
1	0.1084	10.843	Phenotype_recessive	-5.5871	0	0
1	0.1088	10.879	Phenotype_recessive	-5.5702	0	0
1	0.1091	10.914	Phenotype_recessive	-5.5546	0	0
1	0.1095	10.95	Phenotype_recessive	-5.5404	0	0
1	0.1096	10.956	Phenotype_recessive	-5.5378	0	0
1	0.1096	10.963	Phenotype_recessive	-5.5353	0	0
1	0.1097	10.97	Phenotype_recessive	-5.5327	0	0
1	0.1098	10.977	Phenotype_recessive	-5.5303	0	0
1	0.1099	10.988	Phenotype_recessive	-5.5265	0	0
1	0.11	10.998	Phenotype_recessive	-5.5229	0	0
1	0.1101	11.009	Phenotype_recessive	-5.5193	0	0
1	0.1102	11.019	Phenotype_recessive	-5.5158	0	0
1	0.1102	11.022	Phenotype_recessive	-5.5149	0	0
1	0.1102	11.025	Phenotype_recessive	-5.5141	0	0
1	0.1103	11.028	Phenotype_recessive	-5.5132	0	0
1	0.1103	11.03	Phenotype_recessive	-5.5123	0	0
1	0.1103	11.033	Phenotype_recessive	-5.5115	0	0
1	0.1104	11.036	Phenotype_recessive	-5.5107	0	0
1	0.1104	11.038	Phenotype_recessive	-5.5099	0	0
1	0.1104	11.041	Phenotype_recessive	-5.5091	0	0
1	0.1106	11.055	Phenotype_recessive	-5.5048	0	0
1	0.1107	11.069	Phenotype_recessive	-5.5007	0	0
1	0.1108	11.083	Phenotype_recessive	-5.4968	0	0
1	0.111	11.098	Phenotype_recessive	-5.4929	0	0
1	0.1111	11.115	Phenotype_recessive	-5.4885	0	0
1	0.1113	11.132	Phenotype_recessive	-5.4843	0	0
1	0.1115	11.149	Phenotype_recessive	-5.4802	0	0
1	0.1117	11.167	Phenotype_recessive	-5.4764	0	0
1	0.1117	11.167	Phenotype_recessive	-5.4763	0	0
1	0.1117	11.167	Phenotype_recessive	-5.4763	0	0
1	0.1117	11.168	Phenotype_recessive	-5.4762	0	0
1	0.1117	11.168	Phenotype_recessive	-5.4761	0	0
1	0.1117	11.173	Phenotype_recessive	-5.4751	0	0
1	0.1118	11.178	Phenotype_recessive	-5.4741	0	0
1	0.1118	11.182	Phenotype_recessive	-5.4731	0	0
1	0.1119	11.187	Phenotype_recessive	-5.4721	0	0
1	0.1119	11.188	Phenotype_recessive	-5.4718	0	0
1	0.1119	11.19	Phenotype_recessive	-5.4715	0	0
1	0.1119	11.191	Phenotype_recessive	-5.4713	0	0
1	0.1119	11.192	Phenotype_recessive	-5.471	0	0
1	0.112	11.202	Phenotype_recessive	-5.4691	0	0
1	0.1121	11.211	Phenotype_recessive	-5.4673	0	0
1	0.1122	11.221	Phenotype_recessive	-5.4655	0	0
1	0.1123	11.231	Phenotype_recessive	-5.4638	0	0
1	0.1124	11.245	Phenotype_recessive	-5.4613	0	0
1	0.1126	11.259	Phenotype_recessive	-5.459	0	0
1	0.1127	11.273	Phenotype_recessive	-5.4568	0	0
1	0.1129	11.287	Phenotype_recessive	-5.4547	0	0
1	0.113	11.297	Phenotype_recessive	-5.4532	0	0
1	0.1131	11.308	Phenotype_recessive	-5.4517	0	0
1	0.1132	11.318	Phenotype_recessive	-5.4503	0	0
1	0.1133	11.329	Phenotype_recessive	-5.449	0	0
1	0.1134	11.339	Phenotype_recessive	-5.4478	0	0
1	0.1135	11.349	Phenotype_recessive	-5.4466	0	0
1	0.1136	11.359	Phenotype_recessive	-5.4455	0	0
1	0.1137	11.369	Phenotype_recessive	-5.4444	0	0
1	0.1141	11.412	Phenotype_recessive	-5.4405	0	0
1	0.1145	11.454	Phenotype_recessive	-5.4374	0	0
1	0.115	11.497	Phenotype_recessive	-5.4353	0	0
1	0.1154	11.54	Phenotype_recessive	-5.434	0	0
1	0.1156	11.561	Phenotype_recessive	-5.4337	0	0
1	0.1158	11.581	Phenotype_recessive	-5.4336	0	0
1	0.116	11.602	Phenotype_recessive	-5.4337	0	0
1	0.1162	11.623	Phenotype_recessive	-5.434	0	0
1	0.1162	11.625	Phenotype_recessive	-5.4341	0	0
1	0.1163	11.626	Phenotype_recessive	-5.4341	0	0
1	0.1163	11.628	Phenotype_recessive	-5.4341	0	0
1	0.1163	11.629	Phenotype_recessive	-5.4342	0	0
1	0.1165	11.649	Phenotype_recessive	-5.4347	0	0
1	0.1167	11.669	Phenotype_recessive	-5.4355	0	0
1	0.1169	11.689	Phenotype_recessive	-5.4364	0	0
1	0.1171	11.709	Phenotype_recessive	-5.4375	0	0
1	0.1171	11.712	Phenotype_recessive	-5.4377	0	0
1	0.1172	11.715	Phenotype_recessive	-5.4379	0	0
1	0.1172	11.718	Phenotype_recessive	-5.4381	0	0
1	0.1172	11.722	Phenotype_recessive	-5.4384	0	0
1	0.1175	11.752	Phenotype_recessive	-5.4407	0	0
1	0.1178	11.783	Phenotype_recessive	-5.4435	0	0
1	0.1181	11.814	Phenotype_recessive	-5.4468	0	0
1	0.1184	11.845	Phenotype_recessive	-5.4505	0	0
1	0.1188	11.879	Phenotype_recessive	-5.4553	0	0
1	0.1191	11.913	Phenotype_recessive	-5.4608	0	0
1	0.1195	11.948	Phenotype_recessive	-5.4669	0	0
1	0.1198	11.982	Phenotype_recessive	-5.4737	0	0
1	0.1199	11.988	Phenotype_recessive	-5.475	0	0
1	0.1199	11.994	Phenotype_recessive	-5.4764	0	0
1	0.12	12.001	Phenotype_recessive	-5.4778	0	0
1	0.1201	12.007	Phenotype_recessive	-5.4792	0	0
1	0.1201	12.012	Phenotype_recessive	-5.4802	0	0
1	0.1202	12.016	Phenotype_recessive	-5.4812	0	0
1	0.1202	12.02	Phenotype_recessive	-5.4822	0	0
1	0.1202	12.025	Phenotype_recessive	-5.4833	0	0
1	0.1204	12.044	Phenotype_recessive	-5.4879	0	0
1	0.1206	12.063	Phenotype_recessive	-5.4928	0	0
1	0.1208	12.082	Phenotype_recessive	-5.498	0	0
1	0.121	12.101	Phenotype_recessive	-5.5034	0	0
1	0.1211	12.106	Phenotype_recessive	-5.5047	0	0
1	0.1211	12.11	Phenotype_recessive	-5.506	0	0
1	0.1211	12.115	Phenotype_recessive	-5.5073	0	0
1	0.1212	12.119	Phenotype_recessive	-5.5087	0	0
1	0.1212	12.12	Phenotype_recessive	-5.5091	0	0
1	0.1212	12.122	Phenotype_recessive	-5.5095	0	0
1	0.1212	12.123	Phenotype_recessive	-5.5099	0	0
1	0.1212	12.124	Phenotype_recessive	-5.5103	0	0
1	0.1215	12.153	Phenotype_recessive	-5.5195	0	0
1	0.1218	12.182	Phenotype_recessive	-5.5294	0	0
1	0.1221	12.211	Phenotype_recessive	-5.5401	0	0
1	0.1224	12.239	Phenotype_recessive	-5.5515	0	0
1	0.1227	12.274	Phenotype_recessive	-5.5663	0	0
1	0.1231	12.308	Phenotype_recessive	-5.5825	0	0
1	0.1234	12.343	Phenotype_recessive	-5.6001	0	0
1	0.1238	12.378	Phenotype_recessive	-5.6193	0	0
1	0.124	12.403	Phenotype_recessive	-5.6349	0	0
1	0.1243	12.429	Phenotype_recessive	-5.6516	0	0
1	0.1246	12.455	Phenotype_recessive	-5.6695	0	0
1	0.1248	12.481	Phenotype_recessive	-5.6887	0	0
1	0.1248	12.483	Phenotype_recessive	-5.6902	0	0
1	0.1248	12.485	Phenotype_recessive	-5.6916	0	0
1	0.1249	12.487	Phenotype_recessive	-5.6931	0	0
1	0.1249	12.489	Phenotype_recessive	-5.6946	0	0
1	0.1255	12.548	Phenotype_recessive	-5.6865	0	0
1	0.1261	12.607	Phenotype_recessive	-5.6816	0	0
1	0.1267	12.666	Phenotype_recessive	-5.6796	0	0
1	0.1272	12.725	Phenotype_recessive	-5.6805	0	0
1	0.1273	12.727	Phenotype_recessive	-5.6806	0	0
1	0.1273	12.728	Phenotype_recessive	-5.6807	0	0
1	0.1273	12.73	Phenotype_recessive	-5.6807	0	0
1	0.1273	12.732	Phenotype_recessive	-5.6808	0	0
1	0.1274	12.736	Phenotype_recessive	-5.681	0	0
1	0.1274	12.739	Phenotype_recessive	-5.6812	0	0
1	0.1274	12.742	Phenotype_recessive	-5.6813	0	0
1	0.1275	12.745	Phenotype_recessive	-5.6815	0	0
1	0.1277	12.775	Phenotype_recessive	-5.6836	0	0
1	0.128	12.805	Phenotype_recessive	-5.6865	0	0
1	0.1283	12.834	Phenotype_recessive	-5.6901	0	0
1	0.1286	12.864	Phenotype_recessive	-5.6946	0	0
1	0.1287	12.865	Phenotype_recessive	-5.6946	0	0
1	0.1287	12.866	Phenotype_recessive	-5.6946	0	0
1	0.1287	12.867	Phenotype_recessive	-5.6946	0	0
1	0.1287	12.868	Phenotype_recessive	-5.6946	0	0
1	0.1287	12.871	Phenotype_recessive	-5.6945	0	0
1	0.1287	12.875	Phenotype_recessive	-5.6945	0	0
1	0.1288	12.878	Phenotype_recessive	-5.6945	0	0
1	0.1288	12.881	Phenotype_recessive	-5.6946	0	0
1	0.129	12.897	Phenotype_recessive	-5.6942	0	0
1	0.1291	12.913	Phenotype_recessive	-5.6941	0	0
1	0.1293	12.93	Phenotype_recessive	-5.6942	0	0
1	0.1295	12.946	Phenotype_recessive	-5.6946	0	0
1	0.1297	12.974	Phenotype_recessive	-5.6936	0	0
1	0.13	13.002	Phenotype_recessive	-5.6932	0	0
1	0.1303	13.03	Phenotype_recessive	-5.6936	0	0
1	0.1306	13.057	Phenotype_recessive	-5.6946	0	0
1	0.1306	13.06	Phenotype_recessive	-5.6946	0	0
1	0.1306	13.062	Phenotype_recessive	-5.6946	0	0
1	0.1306	13.064	Phenotype_recessive	-5.6946	0	0
1	0.1307	13.066	Phenotype_recessive	-5.6946	0	0
1	0.1307	13.07	Phenotype_recessive	-5.6945	0	0
1	0.1307	13.073	Phenotype_recessive	-5.6944	0	0
1	0.1308	13.077	Phenotype_recessive	-5.6943	0	0
1	0.1308	13.081	Phenotype_recessive	-5.6943	0	0
1	0.1309	13.093	Phenotype_recessive	-5.6942	0	0
1	0.131	13.105	Phenotype_recessive	-5.6942	0	0
1	0.1312	13.117	Phenotype_recessive	-5.6943	0	0
1	0.1313	13.129	Phenotype_recessive	-5.6946	0	0
1	0.1313	13.13	Phenotype_recessive	-5.6946	0	0
1	0.1313	13.13	Phenotype_recessive	-5.6946	0	0
1	0.1313	13.131	Phenotype_recessive	-5.6946	0	0
1	0.1313	13.132	Phenotype_recessive	-5.6946	0	0
1	0.1313	13.134	Phenotype_recessive	-5.6945	0	0
1	0.1313	13.135	Phenotype_recessive	-5.6945	0	0
1	0.1314	13.136	Phenotype_recessive	-5.6944	0	0
1	0.1314	13.138	Phenotype_recessive	-5.6944	0	0
1	0.1315	13.148	Phenotype_recessive	-5.6941	0	0
1	0.1316	13.158	Phenotype_recessive	-5.6939	0	0
1	0.1317	13.168	Phenotype_recessive	-5.6937	0	0
1	0.1318	13.179	Phenotype_recessive	-5.6937	0	0
1	0.1319	13.19	Phenotype_recessive	-5.6938	0	0
1	0.132	13.201	Phenotype_recessive	-5.6939	0	0
1	0.1321	13.212	Phenotype_recessive	-5.6942	0	0
1	0.1322	13.223	Phenotype_recessive	-5.6946	0	0
1	0.1322	13.223	Phenotype_recessive	-5.6946	0	0
1	0.1322	13.223	Phenotype_recessive	-5.6946	0	0
1	0.1322	13.223	Phenotype_recessive	-5.6946	0	0
1	0.1322	13.223	Phenotype_recessive	-5.6946	0	0
1	0.1322	13.223	Phenotype_recessive	-5.6946	0	0
1	0.1322	13.223	Phenotype_recessive	-5.6946	0	0
1	0.1322	13.223	Phenotype_recessive	-5.6946	0	0
1	0.1322	13.224	Phenotype_recessive	-5.6946	0	0
1	0.1323	13.231	Phenotype_recessive	-5.6942	0	0
1	0.1324	13.239	Phenotype_recessive	-5.6938	0	0
1	0.1325	13.246	Phenotype_recessive	-5.6935	0	0
1	0.1325	13.254	Phenotype_recessive	-5.6932	0	0
1	0.1326	13.256	Phenotype_recessive	-5.6932	0	0
1	0.1326	13.257	Phenotype_recessive	-5.6931	0	0
1	0.1326	13.259	Phenotype_recessive	-5.6931	0	0
1	0.1326	13.26	Phenotype_recessive	-5.6931	0	0
1	0.1327	13.27	Phenotype_recessive	-5.6929	0	0
1	0.1328	13.279	Phenotype_recessive	-5.6927	0	0
1	0.1329	13.289	Phenotype_recessive	-5.6927	0	0
1	0.133	13.298	Phenotype_recessive	-5.6927	0	0
1	0.1331	13.31	Phenotype_recessive	-5.6929	0	0
1	0.1332	13.323	Phenotype_recessive	-5.6932	0	0
1	0.1334	13.335	Phenotype_recessive	-5.6936	0	0
1	0.1335	13.348	Phenotype_recessive	-5.6941	0	0
1	0.1335	13.35	Phenotype_recessive	-5.6942	0	0
1	0.1335	13.352	Phenotype_recessive	-5.6944	0	0
1	0.1335	13.354	Phenotype_recessive	-5.6945	0	0
1	0.1336	13.356	Phenotype_recessive	-5.6946	0	0
1	0.1336	13.359	Phenotype_recessive	-5.6946	0	0
1	0.1336	13.363	Phenotype_recessive	-5.6946	0	0
1	0.1337	13.366	Phenotype_recessive	-5.6946	0	0
1	0.1337	13.37	Phenotype_recessive	-5.6946	0	0
1	0.1337	13.374	Phenotype_recessive	-5.6946	0	0
1	0.1338	13.378	Phenotype_recessive	-5.6946	0	0
1	0.1338	13.381	Phenotype_recessive	-5.6946	0	0
1	0.1339	13.385	Phenotype_recessive	-5.6946	0	0
1	0.134	13.397	Phenotype_recessive	-5.6941	0	0
1	0.1341	13.408	Phenotype_recessive	-5.6937	0	0
1	0.1342	13.42	Phenotype_recessive	-5.6935	0	0
1	0.1343	13.431	Phenotype_recessive	-5.6934	0	0
1	0.1344	13.44	Phenotype_recessive	-5.6933	0	0
1	0.1345	13.449	Phenotype_recessive	-5.6934	0	0
1	0.1346	13.458	Phenotype_recessive	-5.6935	0	0
1	0.1347	13.467	Phenotype_recessive	-5.6936	0	0
1	0.1347	13.468	Phenotype_recessive	-5.6937	0	0
1	0.1347	13.469	Phenotype_recessive	-5.6937	0	0
1	0.1347	13.471	Phenotype_recessive	-5.6937	0	0
1	0.1347	13.472	Phenotype_recessive	-5.6938	0	0
1	0.1348	13.477	Phenotype_recessive	-5.6939	0	0
1	0.1348	13.483	Phenotype_recessive	-5.6941	0	0
1	0.1349	13.488	Phenotype_recessive	-5.6943	0	0
1	0.1349	13.493	Phenotype_recessive	-5.6946	0	0
1	0.1349	13.493	Phenotype_recessive	-5.6946	0	0
1	0.1349	13.494	Phenotype_recessive	-5.6946	0	0
1	0.1349	13.494	Phenotype_recessive	-5.6946	0	0
1	0.1349	13.494	Phenotype_recessive	-5.6946	0	0
1	0.1349	13.494	Phenotype_recessive	-5.6946	0	0
1	0.1349	13.495	Phenotype_recessive	-5.6946	0	0
1	0.135	13.495	Phenotype_recessive	-5.6946	0	0
1	0.135	13.496	Phenotype_recessive	-5.6946	0	0
1	0.135	13.498	Phenotype_recessive	-5.6946	0	0
1	0.135	13.501	Phenotype_recessive	-5.6946	0	0
1	0.135	13.503	Phenotype_recessive	-5.6946	0	0
1	0.1351	13.506	Phenotype_recessive	-5.6946	0	0
1	0.1351	13.506	Phenotype_recessive	-5.6946	0	0
1	0.1351	13.506	Phenotype_recessive	-5.6946	0	0
1	0.1351	13.506	Phenotype_recessive	-5.6946	0	0
1	0.1351	13.506	Phenotype_recessive	-5.6946	0	0
1	0.1351	13.509	Phenotype_recessive	-5.6945	0	0
1	0.1351	13.513	Phenotype_recessive	-5.6945	0	0
1	0.1352	13.516	Phenotype_recessive	-5.6944	0	0
1	0.1352	13.519	Phenotype_recessive	-5.6944	0	0
1	0.1353	13.528	Phenotype_recessive	-5.6943	0	0
1	0.1354	13.537	Phenotype_recessive	-5.6944	0	0
1	0.1355	13.545	Phenotype_recessive	-5.6944	0	0
1	0.1355	13.554	Phenotype_recessive	-5.6946	0	0
1	0.1356	13.558	Phenotype_recessive	-5.6944	0	0
1	0.1356	13.561	Phenotype_recessive	-5.6942	0	0
1	0.1356	13.565	Phenotype_recessive	-5.694	0	0
1	0.1357	13.568	Phenotype_recessive	-5.6938	0	0
1	0.136	13.599	Phenotype_recessive	-5.6928	0	0
1	0.1363	13.631	Phenotype_recessive	-5.6925	0	0
1	0.1366	13.662	Phenotype_recessive	-5.6931	0	0
1	0.1369	13.693	Phenotype_recessive	-5.6946	0	0
1	0.1369	13.694	Phenotype_recessive	-5.6946	0	0
1	0.1369	13.694	Phenotype_recessive	-5.6946	0	0
1	0.1369	13.695	Phenotype_recessive	-5.6946	0	0
1	0.137	13.695	Phenotype_recessive	-5.6946	0	0
1	0.137	13.701	Phenotype_recessive	-5.6945	0	0
1	0.1371	13.707	Phenotype_recessive	-5.6945	0	0
1	0.1371	13.712	Phenotype_recessive	-5.6945	0	0
1	0.1372	13.718	Phenotype_recessive	-5.6946	0	0
1	0.1372	13.722	Phenotype_recessive	-5.6945	0	0
1	0.1373	13.726	Phenotype_recessive	-5.6945	0	0
1	0.1373	13.73	Phenotype_recessive	-5.6944	0	0
1	0.1373	13.734	Phenotype_recessive	-5.6944	0	0
1	0.1374	13.741	Phenotype_recessive	-5.6944	0	0
1	0.1375	13.747	Phenotype_recessive	-5.6944	0	0
1	0.1375	13.753	Phenotype_recessive	-5.6945	0	0
1	0.1376	13.76	Phenotype_recessive	-5.6946	0	0
1	0.1378	13.775	Phenotype_recessive	-5.6942	0	0
1	0.1379	13.791	Phenotype_recessive	-5.6941	0	0
1	0.1381	13.807	Phenotype_recessive	-5.6942	0	0
1	0.1382	13.823	Phenotype_recessive	-5.6946	0	0
1	0.1384	13.843	Phenotype_recessive	-5.694	0	0
1	0.1386	13.863	Phenotype_recessive	-5.6939	0	0
1	0.1388	13.882	Phenotype_recessive	-5.694	0	0
1	0.139	13.902	Phenotype_recessive	-5.6946	0	0
1	0.139	13.903	Phenotype_recessive	-5.6945	0	0
1	0.139	13.903	Phenotype_recessive	-5.6945	0	0
1	0.139	13.903	Phenotype_recessive	-5.6945	0	0
1	0.139	13.903	Phenotype_recessive	-5.6945	0	0
1	0.1392	13.919	Phenotype_recessive	-5.6942	0	0
1	0.1394	13.935	Phenotype_recessive	-5.6941	0	0
1	0.1395	13.951	Phenotype_recessive	-5.6942	0	0
1	0.1397	13.967	Phenotype_recessive	-5.6945	0	0
1	0.1398	13.981	Phenotype_recessive	-5.6943	0	0
1	0.1399	13.994	Phenotype_recessive	-5.6942	0	0
1	0.1401	14.008	Phenotype_recessive	-5.6942	0	0
1	0.1402	14.022	Phenotype_recessive	-5.6945	0	0
1	0.1402	14.022	Phenotype_recessive	-5.6945	0	0
1	0.1402	14.023	Phenotype_recessive	-5.6945	0	0
1	0.1402	14.024	Phenotype_recessive	-5.6945	0	0
1	0.1403	14.025	Phenotype_recessive	-5.6945	0	0
1	0.1403	14.026	Phenotype_recessive	-5.6945	0	0
1	0.1403	14.027	Phenotype_recessive	-5.6945	0	0
1	0.1403	14.027	Phenotype_recessive	-5.6945	0	0
1	0.1403	14.028	Phenotype_recessive	-5.6945	0	0
1	0.1403	14.028	Phenotype_recessive	-5.6945	0	0
1	0.1403	14.028	Phenotype_recessive	-5.6945	0	0
1	0.1403	14.028	Phenotype_recessive	-5.6945	0	0
1	0.1403	14.028	Phenotype_recessive	-5.6945	0	0
1	0.1403	14.028	Phenotype_recessive	-5.6945	0	0
1	0.1403	14.028	Phenotype_recessive	-5.6945	0	0
1	0.1403	14.029	Phenotype_recessive	-5.6945	0	0
1	0.1403	14.029	Phenotype_recessive	-5.6945	0	0
1	0.1404	14.036	Phenotype_recessive	-5.6939	0	0
1	0.1404	14.044	Phenotype_recessive	-5.6933	0	0
1	0.1405	14.051	Phenotype_recessive	-5.6928	0	0
1	0.1406	14.059	Phenotype_recessive	-5.6924	0	0
1	0.1409	14.091	Phenotype_recessive	-5.6909	0	0
1	0.1412	14.123	Phenotype_recessive	-5.6903	0	0
1	0.1416	14.155	Phenotype_recessive	-5.6906	0	0
1	0.1419	14.188	Phenotype_recessive	-5.6918	0	0
1	0.1419	14.195	Phenotype_recessive	-5.6923	0	0
1	0.142	14.202	Phenotype_recessive	-5.6927	0	0
1	0.1421	14.21	Phenotype_recessive	-5.6932	0	0
1	0.1422	14.217	Phenotype_recessive	-5.6938	0	0
1	0.1422	14.22	Phenotype_recessive	-5.694	0	0
1	0.1422	14.222	Phenotype_recessive	-5.6941	0	0
1	0.1422	14.224	Phenotype_recessive	-5.6943	0	0
1	0.1423	14.227	Phenotype_recessive	-5.6945	0	0
1	0.1423	14.232	Phenotype_recessive	-5.6929	0	0
1	0.1424	14.238	Phenotype_recessive	-5.6912	0	0
1	0.1424	14.243	Phenotype_recessive	-5.6896	0	0
1	0.1425	14.249	Phenotype_recessive	-5.688	0	0
1	0.1425	14.25	Phenotype_recessive	-5.6877	0	0
1	0.1425	14.251	Phenotype_recessive	-5.6875	0	0
1	0.1425	14.252	Phenotype_recessive	-5.6872	0	0
1	0.1425	14.253	Phenotype_recessive	-5.6869	0	0
1	0.1426	14.26	Phenotype_recessive	-5.6849	0	0
1	0.1427	14.267	Phenotype_recessive	-5.683	0	0
1	0.1427	14.274	Phenotype_recessive	-5.6811	0	0
1	0.1428	14.282	Phenotype_recessive	-5.6792	0	0
1	0.1429	14.295	Phenotype_recessive	-5.676	0	0
1	0.1431	14.308	Phenotype_recessive	-5.673	0	0
1	0.1432	14.321	Phenotype_recessive	-5.6701	0	0
1	0.1433	14.334	Phenotype_recessive	-5.6674	0	0
1	0.1434	14.345	Phenotype_recessive	-5.6652	0	0
1	0.1436	14.356	Phenotype_recessive	-5.6631	0	0
1	0.1437	14.367	Phenotype_recessive	-5.6611	0	0
1	0.1438	14.379	Phenotype_recessive	-5.6592	0	0
1	0.1438	14.381	Phenotype_recessive	-5.6587	0	0
1	0.1438	14.384	Phenotype_recessive	-5.6583	0	0
1	0.1439	14.387	Phenotype_recessive	-5.6578	0	0
1	0.1439	14.39	Phenotype_recessive	-5.6574	0	0
1	0.1439	14.39	Phenotype_recessive	-5.6573	0	0
1	0.1439	14.391	Phenotype_recessive	-5.6573	0	0
1	0.1439	14.391	Phenotype_recessive	-5.6572	0	0
1	0.1439	14.392	Phenotype_recessive	-5.6571	0	0
1	0.144	14.398	Phenotype_recessive	-5.6562	0	0
1	0.144	14.404	Phenotype_recessive	-5.6553	0	0
1	0.1441	14.41	Phenotype_recessive	-5.6545	0	0
1	0.1442	14.416	Phenotype_recessive	-5.6537	0	0
1	0.1443	14.426	Phenotype_recessive	-5.6524	0	0
1	0.1444	14.436	Phenotype_recessive	-5.6512	0	0
1	0.1445	14.446	Phenotype_recessive	-5.6501	0	0
1	0.1446	14.456	Phenotype_recessive	-5.6491	0	0
1	0.1446	14.459	Phenotype_recessive	-5.6488	0	0
1	0.1446	14.461	Phenotype_recessive	-5.6486	0	0
1	0.1446	14.464	Phenotype_recessive	-5.6483	0	0
1	0.1447	14.466	Phenotype_recessive	-5.6481	0	0
1	0.1447	14.468	Phenotype_recessive	-5.648	0	0
1	0.1447	14.469	Phenotype_recessive	-5.6478	0	0
1	0.1447	14.471	Phenotype_recessive	-5.6477	0	0
1	0.1447	14.472	Phenotype_recessive	-5.6476	0	0
1	0.1448	14.475	Phenotype_recessive	-5.6473	0	0
1	0.1448	14.478	Phenotype_recessive	-5.6471	0	0
1	0.1448	14.481	Phenotype_recessive	-5.6468	0	0
1	0.1448	14.484	Phenotype_recessive	-5.6466	0	0
1	0.1449	14.485	Phenotype_recessive	-5.6465	0	0
1	0.1449	14.486	Phenotype_recessive	-5.6464	0	0
1	0.1449	14.487	Phenotype_recessive	-5.6464	0	0
1	0.1449	14.488	Phenotype_recessive	-5.6463	0	0
1	0.1449	14.493	Phenotype_recessive	-5.6459	0	0
1	0.145	14.498	Phenotype_recessive	-5.6456	0	0
1	0.145	14.503	Phenotype_recessive	-5.6453	0	0
1	0.1451	14.508	Phenotype_recessive	-5.645	0	0
1	0.1451	14.515	Phenotype_recessive	-5.6446	0	0
1	0.1452	14.521	Phenotype_recessive	-5.6443	0	0
1	0.1453	14.528	Phenotype_recessive	-5.644	0	0
1	0.1453	14.535	Phenotype_recessive	-5.6438	0	0
1	0.1454	14.535	Phenotype_recessive	-5.6437	0	0
1	0.1454	14.536	Phenotype_recessive	-5.6437	0	0
1	0.1454	14.536	Phenotype_recessive	-5.6437	0	0
1	0.1454	14.537	Phenotype_recessive	-5.6437	0	0
1	0.1454	14.542	Phenotype_recessive	-5.6435	0	0
1	0.1455	14.548	Phenotype_recessive	-5.6433	0	0
1	0.1455	14.554	Phenotype_recessive	-5.6432	0	0
1	0.1456	14.559	Phenotype_recessive	-5.6431	0	0
1	0.1456	14.559	Phenotype_recessive	-5.6431	0	0
1	0.1456	14.56	Phenotype_recessive	-5.6431	0	0
1	0.1456	14.56	Phenotype_recessive	-5.6431	0	0
1	0.1456	14.56	Phenotype_recessive	-5.6431	0	0
1	0.1459	14.591	Phenotype_recessive	-5.6429	0	0
1	0.1462	14.621	Phenotype_recessive	-5.6435	0	0
1	0.1465	14.652	Phenotype_recessive	-5.6447	0	0
1	0.1468	14.683	Phenotype_recessive	-5.6468	0	0
1	0.1469	14.685	Phenotype_recessive	-5.647	0	0
1	0.1469	14.688	Phenotype_recessive	-5.6472	0	0
1	0.1469	14.691	Phenotype_recessive	-5.6474	0	0
1	0.1469	14.694	Phenotype_recessive	-5.6477	0	0
1	0.147	14.697	Phenotype_recessive	-5.648	0	0
1	0.147	14.701	Phenotype_recessive	-5.6483	0	0
1	0.147	14.705	Phenotype_recessive	-5.6487	0	0
1	0.1471	14.708	Phenotype_recessive	-5.649	0	0
1	0.1471	14.711	Phenotype_recessive	-5.6493	0	0
1	0.1471	14.713	Phenotype_recessive	-5.6495	0	0
1	0.1472	14.716	Phenotype_recessive	-5.6498	0	0
1	0.1472	14.718	Phenotype_recessive	-5.65	0	0
1	0.1472	14.722	Phenotype_recessive	-5.6504	0	0
1	0.1473	14.726	Phenotype_recessive	-5.6508	0	0
1	0.1473	14.729	Phenotype_recessive	-5.6513	0	0
1	0.1473	14.733	Phenotype_recessive	-5.6517	0	0
1	0.1473	14.734	Phenotype_recessive	-5.6518	0	0
1	0.1473	14.735	Phenotype_recessive	-5.6519	0	0
1	0.1474	14.736	Phenotype_recessive	-5.652	0	0
1	0.1474	14.737	Phenotype_recessive	-5.6522	0	0
1	0.1474	14.741	Phenotype_recessive	-5.6526	0	0
1	0.1474	14.744	Phenotype_recessive	-5.6531	0	0
1	0.1475	14.748	Phenotype_recessive	-5.6536	0	0
1	0.1475	14.752	Phenotype_recessive	-5.6541	0	0
1	0.1476	14.757	Phenotype_recessive	-5.6547	0	0
1	0.1476	14.762	Phenotype_recessive	-5.6554	0	0
1	0.1477	14.767	Phenotype_recessive	-5.6561	0	0
1	0.1477	14.771	Phenotype_recessive	-5.6569	0	0
1	0.1478	14.775	Phenotype_recessive	-5.6574	0	0
1	0.1478	14.779	Phenotype_recessive	-5.658	0	0
1	0.1478	14.782	Phenotype_recessive	-5.6585	0	0
1	0.1479	14.786	Phenotype_recessive	-5.6591	0	0
1	0.1479	14.787	Phenotype_recessive	-5.6593	0	0
1	0.1479	14.788	Phenotype_recessive	-5.6594	0	0
1	0.1479	14.789	Phenotype_recessive	-5.6596	0	0
1	0.1479	14.79	Phenotype_recessive	-5.6598	0	0
1	0.1479	14.791	Phenotype_recessive	-5.6599	0	0
1	0.1479	14.791	Phenotype_recessive	-5.66	0	0
1	0.1479	14.792	Phenotype_recessive	-5.6601	0	0
1	0.1479	14.793	Phenotype_recessive	-5.6602	0	0
1	0.1479	14.794	Phenotype_recessive	-5.6604	0	0
1	0.1479	14.795	Phenotype_recessive	-5.6606	0	0
1	0.148	14.796	Phenotype_recessive	-5.6608	0	0
1	0.148	14.797	Phenotype_recessive	-5.661	0	0
1	0.148	14.799	Phenotype_recessive	-5.6614	0	0
1	0.148	14.801	Phenotype_recessive	-5.6617	0	0
1	0.148	14.803	Phenotype_recessive	-5.6621	0	0
1	0.1481	14.805	Phenotype_recessive	-5.6624	0	0
1	0.1481	14.809	Phenotype_recessive	-5.6632	0	0
1	0.1481	14.813	Phenotype_recessive	-5.6639	0	0
1	0.1482	14.817	Phenotype_recessive	-5.6647	0	0
1	0.1482	14.821	Phenotype_recessive	-5.6654	0	0
1	0.1482	14.824	Phenotype_recessive	-5.6659	0	0
1	0.1483	14.826	Phenotype_recessive	-5.6664	0	0
1	0.1483	14.828	Phenotype_recessive	-5.6668	0	0
1	0.1483	14.831	Phenotype_recessive	-5.6673	0	0
1	0.1484	14.84	Phenotype_recessive	-5.6691	0	0
1	0.1485	14.849	Phenotype_recessive	-5.6711	0	0
1	0.1486	14.857	Phenotype_recessive	-5.673	0	0
1	0.1487	14.866	Phenotype_recessive	-5.6751	0	0
1	0.1487	14.87	Phenotype_recessive	-5.676	0	0
1	0.1487	14.874	Phenotype_recessive	-5.6768	0	0
1	0.1488	14.877	Phenotype_recessive	-5.6777	0	0
1	0.1488	14.881	Phenotype_recessive	-5.6786	0	0
1	0.1488	14.884	Phenotype_recessive	-5.6793	0	0
1	0.1489	14.887	Phenotype_recessive	-5.6801	0	0
1	0.1489	14.889	Phenotype_recessive	-5.6808	0	0
1	0.1489	14.892	Phenotype_recessive	-5.6815	0	0
1	0.1489	14.893	Phenotype_recessive	-5.6818	0	0
1	0.1489	14.894	Phenotype_recessive	-5.6821	0	0
1	0.149	14.895	Phenotype_recessive	-5.6824	0	0
1	0.149	14.896	Phenotype_recessive	-5.6826	0	0
1	0.149	14.902	Phenotype_recessive	-5.6841	0	0
1	0.1491	14.908	Phenotype_recessive	-5.6857	0	0
1	0.1491	14.913	Phenotype_recessive	-5.6872	0	0
1	0.1492	14.919	Phenotype_recessive	-5.6889	0	0
1	0.1492	14.919	Phenotype_recessive	-5.689	0	0
1	0.1492	14.92	Phenotype_recessive	-5.6892	0	0
1	0.1492	14.921	Phenotype_recessive	-5.6894	0	0
1	0.1492	14.921	Phenotype_recessive	-5.6895	0	0
1	0.1493	14.925	Phenotype_recessive	-5.6908	0	0
1	0.1493	14.93	Phenotype_recessive	-5.692	0	0
1	0.1493	14.934	Phenotype_recessive	-5.6933	0	0
1	0.1494	14.938	Phenotype_recessive	-5.6945	0	0
1	0.1494	14.941	Phenotype_recessive	-5.6945	0	0
1	0.1494	14.944	Phenotype_recessive	-5.6944	0	0
1	0.1495	14.947	Phenotype_recessive	-5.6944	0	0
1	0.1495	14.951	Phenotype_recessive	-5.6943	0	0
1	0.1495	14.952	Phenotype_recessive	-5.6943	0	0
1	0.1495	14.953	Phenotype_recessive	-5.6943	0	0
1	0.1495	14.955	Phenotype_recessive	-5.6943	0	0
1	0.1496	14.956	Phenotype_recessive	-5.6943	0	0
1	0.1496	14.959	Phenotype_recessive	-5.6943	0	0
1	0.1496	14.963	Phenotype_recessive	-5.6943	0	0
1	0.1497	14.966	Phenotype_recessive	-5.6943	0	0
1	0.1497	14.969	Phenotype_recessive	-5.6943	0	0
1	0.1497	14.974	Phenotype_recessive	-5.6943	0	0
1	0.1498	14.979	Phenotype_recessive	-5.6944	0	0
1	0.1498	14.984	Phenotype_recessive	-5.6944	0	0
1	0.1499	14.988	Phenotype_recessive	-5.6945	0	0
1	0.1499	14.995	Phenotype_recessive	-5.6945	0	0
1	0.15	15.001	Phenotype_recessive	-5.6945	0	0
1	0.1501	15.008	Phenotype_recessive	-5.6945	0	0
1	0.1501	15.014	Phenotype_recessive	-5.6945	0	0
1	0.1502	15.019	Phenotype_recessive	-5.6945	0	0
1	0.1502	15.023	Phenotype_recessive	-5.6945	0	0
1	0.1503	15.027	Phenotype_recessive	-5.6945	0	0
1	0.1503	15.032	Phenotype_recessive	-5.6945	0	0
1	0.1503	15.033	Phenotype_recessive	-5.6945	0	0
1	0.1503	15.034	Phenotype_recessive	-5.6945	0	0
1	0.1504	15.035	Phenotype_recessive	-5.6945	0	0
1	0.1504	15.036	Phenotype_recessive	-5.6945	0	0
1	0.1504	15.04	Phenotype_recessive	-5.6945	0	0
1	0.1504	15.045	Phenotype_recessive	-5.6945	0	0
1	0.1505	15.049	Phenotype_recessive	-5.6945	0	0
1	0.1505	15.053	Phenotype_recessive	-5.6945	0	0
1	0.1505	15.054	Phenotype_recessive	-5.6945	0	0
[truncated: 378,716+ more rows]

## Sheet: Homozygosity (raw Plink output)
Raw output from the Plink homozygosity analysis.
POOL	FID	IID	PHE	CHR	SNP1	SNP2	BP1	BP2	KB	NSNP	NSIM	GRP
S1	MA509	MA509	-9	1	BICF2P933515	BICF2P781744	37632961	39208737	1575.78	149	1	1*
S1	MA512	MA512	-9	1	BICF2P933515	BICF2P781744	37632961	39208737	1575.78	149	1	1
S1	MA510	MA510	-9	1	BICF2G630717754	BICF2S23645290	31761332	43201740	11440.4	1118	1	2*
S1	MA511	MA511	-9	1	BICF2G630717754	BICF2S23645290	31761332	43201740	11440.4	1118	1	2
S1	CON	4	00:04:00	1	BICF2P933515	BICF2P781744	37632961	39208737	1575.78	149	NA	NA
S1	UNION	4	00:04:00	1	BICF2G630717754	BICF2S23645290	31761332	43201740	11440.4	1118	NA	NA
S2	MA509	MA509	-9	1	BICF2P1182942	CHR1_61649709	59805839	61649709	1843.87	155	2	1
S2	MA510	MA510	-9	1	BICF2P596451	BICF2P422546	61045177	69433945	8388.77	694	3	1*
S2	MA511	MA511	-9	1	BICF2P163187	BICF2G630794334	58444659	77546849	19102.2	1559	1	1
S2	MA512	MA512	-9	1	BICF2P1182942	CHR1_61649709	59805839	61649709	1843.87	155	2	1
S2	CON	4	00:04:00	1	BICF2P596451	CHR1_61649709	61045177	61649709	604.533	52	NA	NA
S2	UNION	4	00:04:00	1	BICF2P163187	BICF2G630794334	58444659	77546849	19102.2	1559	NA	NA
S3	MA509	MA509	-9	2	BICF2P1126539	TIGRP2P32359_RS9175941	77710528	79959270	2248.74	290	3	1*
S3	MA510	MA510	-9	2	BICF2P1126539	BICF2P991103	77710528	79849220	2138.69	279	3	1
S3	MA511	MA511	-9	2	TIGRP2P31582_RS9171225	BICF2P260942	77438481	79563570	2125.09	266	3	1
S3	MA512	MA512	-9	2	BICF2P1126539	BICF2P991103	77710528	79849220	2138.69	279	3	1
S3	CON	4	00:04:00	2	BICF2P1126539	BICF2P260942	77710528	79563570	1853.04	236	NA	NA
S3	UNION	4	00:04:00	2	TIGRP2P31582_RS9171225	TIGRP2P32359_RS9175941	77438481	79959270	2520.79	320	NA	NA
S4	MA509	MA509	-9	3	BICF2P31847	BICF2S23251194	23075656	24221670	1146.02	102	3	1*
S4	MA510	MA510	-9	3	BICF2P31847	BICF2S23251194	23075656	24221670	1146.02	102	3	1
S4	MA511	MA511	-9	3	BICF2G630703558	BICF2S23251194	17067881	24221670	7153.79	570	3	1
S4	MA512	MA512	-9	3	BICF2S23111278	BICF2P286736	23426046	24866596	1440.55	128	3	1
S4	CON	4	00:04:00	3	BICF2S23111278	BICF2S23251194	23426046	24221670	795.625	82	NA	NA
S4	UNION	4	00:04:00	3	BICF2G630703558	BICF2P286736	17067881	24866596	7798.72	616	NA	NA
S5	MA509	MA509	-9	4	BICF2S23332237	BICF2G630175102	26488947	80629549	54140.6	4946	3	1*
S5	MA510	MA510	-9	4	BICF2S23332237	BICF2G630175102	26488947	80629549	54140.6	4946	3	1
S5	MA511	MA511	-9	4	BICF2S23332237	BICF2G630175102	26488947	80629549	54140.6	4946	3	1
S5	MA512	MA512	-9	4	BICF2P322666	BICF2G630175102	28727216	80629549	51902.3	4759	3	1
S5	CON	4	00:04:00	4	BICF2P322666	BICF2G630175102	28727216	80629549	51902.3	4759	NA	NA
S5	UNION	4	00:04:00	4	BICF2S23332237	BICF2G630175102	26488947	80629549	54140.6	4946	NA	NA
S6	MA509	MA509	-9	8	BICF2P829948	BICF2P551283	64434441	66088475	1654.04	149	3	1*
S6	MA510	MA510	-9	8	BICF2P834808	BICF2P551283	64396620	66088475	1691.86	152	3	1
S6	MA511	MA511	-9	8	BICF2P829948	BICF2P551283	64434441	66088475	1654.04	149	3	1
S6	MA512	MA512	-9	8	BICF2P834808	BICF2P551283	64396620	66088475	1691.86	152	3	1
S6	CON	4	00:04:00	8	BICF2P829948	BICF2P551283	64434441	66088475	1654.04	149	NA	NA
S6	UNION	4	00:04:00	8	BICF2P834808	BICF2P551283	64396620	66088475	1691.86	152	NA	NA
S7	MA509	MA509	-9	10	BICF2P1318411	BICF2P709352	6946133	8397696	1451.56	138	3	1*
S7	MA510	MA510	-9	10	BICF2P1318411	BICF2P709352	6946133	8397696	1451.56	138	3	1
S7	MA511	MA511	-9	10	BICF2P1318411	BICF2P709352	6946133	8397696	1451.56	138	3	1
S7	MA512	MA512	-9	10	CHR10_6338638	BICF2S22930988	6338638	9076856	2738.22	240	3	1
S7	CON	4	00:04:00	10	BICF2P1318411	BICF2P709352	6946133	8397696	1451.56	138	NA	NA
S7	UNION	4	00:04:00	10	CHR10_6338638	BICF2S22930988	6338638	9076856	2738.22	240	NA	NA
S8	MA509	MA509	-9	11	BICF2P1033624	BICF2P381953	29118009	53320523	24202.5	1938	3	1*
S8	MA510	MA510	-9	11	BICF2S23553865	BICF2S232456	18662547	54781330	36118.8	3037	3	1
S8	MA511	MA511	-9	11	BICF2P960433	CHR11_33436692	31364259	33436692	2072.43	141	3	1
S8	MA512	MA512	-9	11	BICF2P960433	CHR11_33436692	31364259	33436692	2072.43	141	3	1
S8	CON	4	00:04:00	11	BICF2P960433	CHR11_33436692	31364259	33436692	2072.43	141	NA	NA
S8	UNION	4	00:04:00	11	BICF2S23553865	BICF2S232456	18662547	54781330	36118.8	3037	NA	NA
S9	MA509	MA509	-9	11	BICF2P1033624	BICF2P381953	29118009	53320523	24202.5	1938	3	1*
S9	MA510	MA510	-9	11	BICF2S23553865	BICF2S232456	18662547	54781330	36118.8	3037	3	1
S9	MA511	MA511	-9	11	CHR11_33770372	CHR11_51840489	33770372	51840489	18070.1	1472	3	1
S9	MA512	MA512	-9	11	CHR11_33770372	CHR11_51840489	33770372	51840489	18070.1	1472	3	1
S9	CON	4	00:04:00	11	CHR11_33770372	CHR11_51840489	33770372	51840489	18070.1	1472	NA	NA
S9	UNION	4	00:04:00	11	BICF2S23553865	BICF2S232456	18662547	54781330	36118.8	3037	NA	NA
S10	MA509	MA509	-9	12	TIGRP2P161775_RS8882994	TIGRP2P168467_RS8864570	27917024	52171817	24254.8	2036	3	1*
S10	MA510	MA510	-9	12	TIGRP2P161775_RS8882994	TIGRP2P168467_RS8864570	27917024	52171817	24254.8	2036	3	1
S10	MA511	MA511	-9	12	TIGRP2P161775_RS8882994	TIGRP2P163310_RS8800105	27917024	33711198	5794.18	459	3	1
S10	MA512	MA512	-9	12	TIGRP2P161775_RS8882994	TIGRP2P163310_RS8800105	27917024	33711198	5794.18	459	3	1
S10	CON	4	00:04:00	12	TIGRP2P161775_RS8882994	TIGRP2P163310_RS8800105	27917024	33711198	5794.18	459	NA	NA
S10	UNION	4	00:04:00	12	TIGRP2P161775_RS8882994	TIGRP2P168467_RS8864570	27917024	52171817	24254.8	2036	NA	NA
S11	MA509	MA509	-9	14	BICF2S2314727	BICF2P334136	23363657	28742035	5378.38	446	3	1*
S11	MA510	MA510	-9	14	BICF2S2314727	TIGRP2P190650_RS9033748	23363657	28619321	5255.66	437	3	1
S11	MA511	MA511	-9	14	BICF2G630517799	TIGRP2P190650_RS9033748	2802415	28619321	25816.9	2243	3	1
S11	MA512	MA512	-9	14	BICF2P1499	TIGRP2P190650_RS9033748	17125762	28619321	11493.6	1011	3	1
S11	CON	4	00:04:00	14	BICF2S2314727	TIGRP2P190650_RS9033748	23363657	28619321	5255.66	437	NA	NA
S11	UNION	4	00:04:00	14	BICF2G630517799	BICF2P334136	2802415	28742035	25939.6	2252	NA	NA
S12	MA509	MA509	-9	24	BICF2P122622	CHR24_3010250	1477853	3010250	1532.4	121	3	1*
S12	MA510	MA510	-9	24	BICF2P761175	BICF2P45615	1961883	3407905	1446.02	107	3	1
S12	MA511	MA511	-9	24	BICF2P761175	BICF2P45615	1961883	3407905	1446.02	107	3	1
S12	MA512	MA512	-9	24	BICF2P1088842	BICF2P45615	1912489	3407905	1495.42	111	3	1
S12	CON	4	00:04:00	24	BICF2P761175	CHR24_3010250	1961883	3010250	1048.37	77	NA	NA
S12	UNION	4	00:04:00	24	BICF2P122622	BICF2P45615	1477853	3407905	1930.05	151	NA	NA
S13	MA509	MA509	-9	24	BICF2G630506027	BICF2S23513444	15835387	18753685	2918.3	322	3	1*
S13	MA510	MA510	-9	24	BICF2G630505699	BICF2S23513444	16575847	18753685	2177.84	244	3	1
S13	MA511	MA511	-9	24	BICF2G630505699	BICF2S23513444	16575847	18753685	2177.84	244	3	1
S13	MA512	MA512	-9	24	BICF2G630505699	BICF2S23513444	16575847	18753685	2177.84	244	3	1
S13	CON	4	00:04:00	24	BICF2G630505699	BICF2S23513444	16575847	18753685	2177.84	244	NA	NA
S13	UNION	4	00:04:00	24	BICF2G630506027	BICF2S23513444	15835387	18753685	2918.3	322	NA	NA
S14	MA509	MA509	-9	28	BICF2P1337546	BICF2P1364604	1515250	2711056	1195.81	114	3	1*
S14	MA510	MA510	-9	28	BICF2P1337546	BICF2P1364604	1515250	2711056	1195.81	114	3	1
S14	MA511	MA511	-9	28	BICF2P1337546	BICF2P1364604	1515250	2711056	1195.81	114	3	1
S14	MA512	MA512	-9	28	BICF2P1337546	BICF2P1364604	1515250	2711056	1195.81	114	3	1
S14	CON	4	00:04:00	28	BICF2P1337546	BICF2P1364604	1515250	2711056	1195.81	114	NA	NA
S14	UNION	4	00:04:00	28	BICF2P1337546	BICF2P1364604	1515250	2711056	1195.81	114	NA	NA
S15	MA509	MA509	-9	34	BICF2P1010320	TIGRP2P395952_RS8849227	11764377	19495156	7730.78	681	3	1*
S15	MA510	MA510	-9	34	BICF2P1010320	BICF2P97204	11764377	14850902	3086.53	250	3	1
S15	MA511	MA511	-9	34	BICF2P1010320	TIGRP2P395952_RS8849227	11764377	19495156	7730.78	681	3	1
S15	MA512	MA512	-9	34	BICF2P1427429	BICF2P784619	10454123	18950160	8496.04	782	3	1
S15	CON	4	00:04:00	34	BICF2P1010320	BICF2P97204	11764377	14850902	3086.53	250	NA	NA
S15	UNION	4	00:04:00	34	BICF2P1427429	TIGRP2P395952_RS8849227	10454123	19495156	9041.03	836	NA	NA
S16	MA509	MA509	-9	34	BICF2P1010320	TIGRP2P395952_RS8849227	11764377	19495156	7730.78	681	3	1*
S16	MA510	MA510	-9	34	BICF2P762038	BICF2P784619	15530451	18950160	3419.71	316	3	1
S16	MA511	MA511	-9	34	BICF2P1010320	TIGRP2P395952_RS8849227	11764377	19495156	7730.78	681	3	1
S16	MA512	MA512	-9	34	BICF2P1427429	BICF2P784619	10454123	18950160	8496.04	782	3	1
S16	CON	4	00:04:00	34	BICF2P762038	BICF2P784619	15530451	18950160	3419.71	316	NA	NA
S16	UNION	4	00:04:00	34	BICF2P1427429	TIGRP2P395952_RS8849227	10454123	19495156	9041.03	836	NA	NA
S17	MA509	MA509	-9	1	BICF2P467525	BICF2P363287	9338347	12831740	3493.39	233	2	1*
S17	MA510	MA510	-9	1	CHR1_10672540	BICF2P527838	10672540	12452013	1779.47	122	2	1
S17	MA512	MA512	-9	1	BICF2P467525	BICF2P363287	9338347	12831740	3493.39	233	2	1
S17	CON	3	00:03:00	1	CHR1_10672540	BICF2P527838	10672540	12452013	1779.47	122	NA	NA
S17	UNION	3	00:03:00	1	BICF2P467525	BICF2P363287	9338347	12831740	3493.39	233	NA	NA
S18	MA509	MA509	-9	4	BICF2P1087592	BICF2P515373	20820812	26207986	5387.18	563	2	1*
S18	MA510	MA510	-9	4	BICF2P1087592	BICF2P515373	20820812	26207986	5387.18	563	2	1
S18	MA511	MA511	-9	4	BICF2P1087592	BICF2P515373	20820812	26207986	5387.18	563	2	1
S18	CON	3	00:03:00	4	BICF2P1087592	BICF2P515373	20820812	26207986	5387.18	563	NA	NA
S18	UNION	3	00:03:00	4	BICF2P1087592	BICF2P515373	20820812	26207986	5387.18	563	NA	NA
S19	MA509	MA509	-9	5	TIGRP2P69220_RS9087523	BICF2P574548	1913862	2976132	1062.27	101	2	1*
S19	MA511	MA511	-9	5	TIGRP2P69220_RS9087523	BICF2P574548	1913862	2976132	1062.27	101	2	1
S19	MA512	MA512	-9	5	TIGRP2P69220_RS9087523	BICF2P574548	1913862	2976132	1062.27	101	2	1
S19	CON	3	00:03:00	5	TIGRP2P69220_RS9087523	BICF2P574548	1913862	2976132	1062.27	101	NA	NA
S19	UNION	3	00:03:00	5	TIGRP2P69220_RS9087523	BICF2P574548	1913862	2976132	1062.27	101	NA	NA
S20	MA509	MA509	-9	5	BICF2P1326141	BICF2P1074386	14096371	19263514	5167.14	548	2	1*
S20	MA511	MA511	-9	5	BICF2P1326141	BICF2S23615264	14096371	17882301	3785.93	421	2	1
S20	MA512	MA512	-9	5	BICF2P1326141	BICF2P1074386	14096371	19263514	5167.14	548	2	1
S20	CON	3	00:03:00	5	BICF2P1326141	BICF2S23615264	14096371	17882301	3785.93	421	NA	NA
S20	UNION	3	00:03:00	5	BICF2P1326141	BICF2P1074386	14096371	19263514	5167.14	548	NA	NA
S21	MA509	MA509	-9	6	BICF2P515022	BICF2G630584984	28794412	30922089	2127.68	190	2	1*
S21	MA511	MA511	-9	6	BICF2P515022	BICF2G630584984	28794412	30922089	2127.68	190	2	1
S21	MA512	MA512	-9	6	BICF2P515022	BICF2G630584984	28794412	30922089	2127.68	190	2	1
S21	CON	3	00:03:00	6	BICF2P515022	BICF2G630584984	28794412	30922089	2127.68	190	NA	NA
S21	UNION	3	00:03:00	6	BICF2P515022	BICF2G630584984	28794412	30922089	2127.68	190	NA	NA
S22	MA511	MA511	-9	8	BICF2P1152337	TIGRP2P107657_RS9074344	9545096	11790521	2245.43	174	1	1*
S22	MA512	MA512	-9	8	BICF2P1152337	TIGRP2P107657_RS9074344	9545096	11790521	2245.43	174	1	1
S22	MA510	MA510	-9	8	CHR8_30885	BICF2P1085933	30885	12599721	12568.8	1071	0	2*
S22	CON	3	00:03:00	8	BICF2P1152337	TIGRP2P107657_RS9074344	9545096	11790521	2245.43	174	NA	NA
S22	UNION	3	00:03:00	8	CHR8_30885	BICF2P1085933	30885	12599721	12568.8	1071	NA	NA
S23	MA509	MA509	-9	11	BICF2P1413358	BICF2P1089090	69310724	74388336	5077.61	525	2	1*
S23	MA510	MA510	-9	11	BICF2P1413358	BICF2P1089090	69310724	74388336	5077.61	525	2	1
S23	MA511	MA511	-9	11	BICF2P1410507	BICF2P1335372	64894669	69638910	4744.24	502	2	1
S23	CON	3	00:03:00	11	BICF2P1413358	BICF2P1335372	69310724	69638910	328.187	28	NA	NA
S23	UNION	3	00:03:00	11	BICF2P1410507	BICF2P1089090	64894669	74388336	9493.67	999	NA	NA
S24	MA509	MA509	-9	11	BICF2P1413358	BICF2P1089090	69310724	74388336	5077.61	525	1	1*
S24	MA510	MA510	-9	11	BICF2P1413358	BICF2P1089090	69310724	74388336	5077.61	525	1	1
S24	MA512	MA512	-9	11	CHR11_73208574	BICF2P1089090	73208574	74388336	1179.76	158	0	2*
S24	CON	3	00:03:00	11	CHR11_73208574	BICF2P1089090	73208574	74388336	1179.76	158	NA	NA
S24	UNION	3	00:03:00	11	BICF2P1413358	BICF2P1089090	69310724	74388336	5077.61	525	NA	NA
S25	MA509	MA509	-9	13	BICF2G630602681	BICF2G630603460	1025604	2845584	1819.98	154	2	1*
S25	MA510	MA510	-9	13	BICF2G630602747	BICF2P399302	1099084	2879146	1780.06	152	2	1
S25	MA511	MA511	-9	13	BICF2G630602747	BICF2P399302	1099084	2879146	1780.06	152	2	1
S25	CON	3	00:03:00	13	BICF2G630602747	BICF2G630603460	1099084	2845584	1746.5	149	NA	NA
S25	UNION	3	00:03:00	13	BICF2G630602681	BICF2P399302	1025604	2879146	1853.54	157	NA	NA
S26	MA509	MA509	-9	13	BICF2P645412	BICF2P760583	26162637	28703879	2541.24	209	2	1*
S26	MA510	MA510	-9	13	BICF2G630618331	BICF2P789038	27510768	29226120	1715.35	162	2	1
S26	MA511	MA511	-9	13	BICF2G630618331	BICF2P789038	27510768	29226120	1715.35	162	2	1
S26	CON	3	00:03:00	13	BICF2G630618331	BICF2P760583	27510768	28703879	1193.11	105	NA	NA
S26	UNION	3	00:03:00	13	BICF2P645412	BICF2P789038	26162637	29226120	3063.48	266	NA	NA
S27	MA509	MA509	-9	14	BICF2P887043	BICF2P848634	39258986	44809434	5550.45	562	2	1*
S27	MA510	MA510	-9	14	CHR14_31316543	BICF2G630530254	31316543	41497106	10180.6	897	2	1
S27	MA512	MA512	-9	14	CHR14_31316543	BICF2G630530254	31316543	41497106	10180.6	897	2	1
S27	CON	3	00:03:00	14	BICF2P887043	BICF2G630530254	39258986	41497106	2238.12	204	NA	NA
S27	UNION	3	00:03:00	14	CHR14_31316543	BICF2P848634	31316543	44809434	13492.9	1255	NA	NA
S28	MA509	MA509	-9	15	BICF2G630428693	BICF2G630427034	46713734	51801378	5087.65	468	2	1*
S28	MA510	MA510	-9	15	BICF2G630431045	BICF2P679944	43234758	50553975	7319.22	673	2	1
S28	MA512	MA512	-9	15	BICF2G630431045	BICF2P679944	43234758	50553975	7319.22	673	2	1
S28	CON	3	00:03:00	15	BICF2G630428693	BICF2P679944	46713734	50553975	3840.24	347	NA	NA
S28	UNION	3	00:03:00	15	BICF2G630431045	BICF2G630427034	43234758	51801378	8566.62	794	NA	NA
S29	MA510	MA510	-9	15	BICF2G630424091	BICF2G630421797	54740483	57012944	2272.46	197	1	1*
S29	MA512	MA512	-9	15	BICF2G630424091	TIGRP2P205748_RS8612726	54740483	56348434	1607.95	140	1	1
S29	MA511	MA511	-9	15	BICF2P1126312	BICF2S22913172	52065572	63454481	11388.9	1018	0	2*
S29	CON	3	00:03:00	15	BICF2G630424091	TIGRP2P205748_RS8612726	54740483	56348434	1607.95	140	NA	NA
S29	UNION	3	00:03:00	15	BICF2P1126312	BICF2S22913172	52065572	63454481	11388.9	1018	NA	NA
S30	MA509	MA509	-9	17	BICF2S23316640	BICF2P1362573	18495757	27776174	9280.42	941	2	1*
S30	MA511	MA511	-9	17	BICF2P377355	BICF2P818048	20391172	34726093	14334.9	1396	2	1
S30	MA512	MA512	-9	17	BICF2P377355	BICF2P565955	20391172	25073749	4682.58	516	2	1
S30	CON	3	00:03:00	17	BICF2P377355	BICF2P565955	20391172	25073749	4682.58	516	NA	NA
S30	UNION	3	00:03:00	17	BICF2S23316640	BICF2P818048	18495757	34726093	16230.3	1580	NA	NA
S31	MA509	MA509	-9	17	BICF2S23316640	BICF2P1362573	18495757	27776174	9280.42	941	2	1*
S31	MA510	MA510	-9	17	BICF2G630214366	BICF2P1362573	26283669	27776174	1492.51	142	2	1
S31	MA511	MA511	-9	17	BICF2P377355	BICF2P818048	20391172	34726093	14334.9	1396	2	1
S31	CON	3	00:03:00	17	BICF2G630214366	BICF2P1362573	26283669	27776174	1492.51	142	NA	NA
S31	UNION	3	00:03:00	17	BICF2S23316640	BICF2P818048	18495757	34726093	16230.3	1580	NA	NA
S32	MA509	MA509	-9	17	BICF2G630213272	BICF2P818048	27910616	34726093	6815.48	633	2	1*
S32	MA510	MA510	-9	17	BICF2G630213272	BICF2P818048	27910616	34726093	6815.48	633	2	1
S32	MA511	MA511	-9	17	BICF2P377355	BICF2P818048	20391172	34726093	14334.9	1396	2	1
S32	CON	3	00:03:00	17	BICF2G630213272	BICF2P818048	27910616	34726093	6815.48	633	NA	NA
S32	UNION	3	00:03:00	17	BICF2P377355	BICF2P818048	20391172	34726093	14334.9	1396	NA	NA
S33	MA509	MA509	-9	17	BICF2P1363314	BICF2P201958	42575344	44110098	1534.76	131	2	1*
S33	MA510	MA510	-9	17	BICF2P1363314	BICF2P201958	42575344	44110098	1534.76	131	2	1
S33	MA511	MA511	-9	17	TIGRP2P229861_RS8693610	BICF2P201958	34841312	44110098	9268.79	951	2	1
S33	CON	3	00:03:00	17	BICF2P1363314	BICF2P201958	42575344	44110098	1534.76	131	NA	NA
S33	UNION	3	00:03:00	17	TIGRP2P229861_RS8693610	BICF2P201958	34841312	44110098	9268.79	951	NA	NA
S34	MA509	MA509	-9	18	BICF2G630695425	BICF2P564688	39140112	47488496	8348.39	982	2	1*
S34	MA511	MA511	-9	18	BICF2G630695425	BICF2P564688	39140112	47488496	8348.39	982	2	1
S34	MA512	MA512	-9	18	BICF2P450105	BICF2P631928	43473279	47482128	4008.85	527	2	1
S34	CON	3	00:03:00	18	BICF2P450105	BICF2P631928	43473279	47482128	4008.85	527	NA	NA
S34	UNION	3	00:03:00	18	BICF2G630695425	BICF2P564688	39140112	47488496	8348.39	982	NA	NA
S35	MA510	MA510	-9	19	BICF2P396511	BICF2G63052327	30613894	31892742	1278.85	129	2	1*
S35	MA511	MA511	-9	19	BICF2P396511	BICF2G63052327	30613894	31892742	1278.85	129	2	1
S35	MA512	MA512	-9	19	BICF2P396511	BICF2G63052327	30613894	31892742	1278.85	129	2	1
S35	CON	3	00:03:00	19	BICF2P396511	BICF2G63052327	30613894	31892742	1278.85	129	NA	NA
S35	UNION	3	00:03:00	19	BICF2P396511	BICF2G63052327	30613894	31892742	1278.85	129	NA	NA
S36	MA510	MA510	-9	20	BICF2G630227706	BICF2P1406873	459264	3064551	2605.29	196	2	1*
S36	MA511	MA511	-9	20	BICF2G630227706	BICF2P1406873	459264	3064551	2605.29	196	2	1
S36	MA512	MA512	-9	20	CHR20_779754	CHR20_3101578	779754	3101578	2321.82	173	2	1
S36	CON	3	00:03:00	20	CHR20_779754	BICF2P1406873	779754	3064551	2284.8	170	NA	NA
S36	UNION	3	00:03:00	20	BICF2G630227706	CHR20_3101578	459264	3101578	2642.32	199	NA	NA
S37	MA509	MA509	-9	20	BICF2S2376197	BICF2P428588	46725019	48284382	1559.36	200	2	1*
S37	MA510	MA510	-9	20	BICF2S2376197	BICF2P374429	46725019	48004907	1279.89	158	2	1
S37	MA512	MA512	-9	20	BICF2S2376197	CHR20_48430420	46725019	48430420	1705.4	216	2	1
S37	CON	3	00:03:00	20	BICF2S2376197	BICF2P374429	46725019	48004907	1279.89	158	NA	NA
S37	UNION	3	00:03:00	20	BICF2S2376197	CHR20_48430420	46725019	48430420	1705.4	216	NA	NA
S38	MA510	MA510	-9	21	CHR21_415337	CHR21_2492279	415337	2492279	2076.94	136	2	1*
S38	MA511	MA511	-9	21	BICF2P649163	BICF2P1202143	1270037	3224332	1954.3	124	2	1
S38	MA512	MA512	-9	21	CHR21_415337	CHR21_2492279	415337	2492279	2076.94	136	2	1
S38	CON	3	00:03:00	21	BICF2P649163	CHR21_2492279	1270037	2492279	1222.24	74	NA	NA
S38	UNION	3	00:03:00	21	CHR21_415337	BICF2P1202143	415337	3224332	2809	186	NA	NA
S39	MA510	MA510	-9	22	CHR22_5988769	BICF2P1011965	5988769	23831752	17843	1474	1	1
S39	MA511	MA511	-9	22	CHRUN_JH373295_1257	CHR22_6001633	2390	6001633	5999.24	511	2	1*
S39	MA512	MA512	-9	22	CHRUN_JH373295_1257	BICF2G630319550	2390	14245590	14243.2	1183	1	1
S39	CON	3	00:03:00	22	CHR22_5988769	CHR22_6001633	5988769	6001633	12.865	4	NA	NA
S39	UNION	3	00:03:00	22	CHRUN_JH373295_1257	BICF2P1011965	2390	23831752	23829.4	1981	NA	NA
S40	MA509	MA509	-9	22	BICF2G630319413	BICF2G630320529	13960890	16413515	2452.63	210	2	1*
S40	MA510	MA510	-9	22	CHR22_5988769	BICF2P1011965	5988769	23831752	17843	1474	1	1
S40	MA512	MA512	-9	22	CHRUN_JH373295_1257	BICF2G630319550	2390	14245590	14243.2	1183	1	1
S40	CON	3	00:03:00	22	BICF2G630319413	BICF2G630319550	13960890	14245590	284.701	23	NA	NA
S40	UNION	3	00:03:00	22	CHRUN_JH373295_1257	BICF2P1011965	2390	23831752	23829.4	1981	NA	NA
S41	MA509	MA509	-9	23	BICF2G630382462	BICF2G630374931	18912399	30718357	11806	1069	2	1*
S41	MA511	MA511	-9	23	BICF2G630382462	BICF2G630381537	18912399	20480218	1567.82	146	2	1
S41	MA512	MA512	-9	23	BICF2G630382462	BICF2G630374931	18912399	30718357	11806	1069	2	1
S41	CON	3	00:03:00	23	BICF2G630382462	BICF2G630381537	18912399	20480218	1567.82	146	NA	NA
S41	UNION	3	00:03:00	23	BICF2G630382462	BICF2G630374931	18912399	30718357	11806	1069	NA	NA
S42	MA509	MA509	-9	23	BICF2G630382462	BICF2G630374931	18912399	30718357	11806	1069	2	1*
S42	MA511	MA511	-9	23	BICF2G630381332	BICF2G630374931	20657123	30718357	10061.2	918	2	1
S42	MA512	MA512	-9	23	BICF2G630382462	BICF2G630374931	18912399	30718357	11806	1069	2	1
S42	CON	3	00:03:00	23	BICF2G630381332	BICF2G630374931	20657123	30718357	10061.2	918	NA	NA
S42	UNION	3	00:03:00	23	BICF2G630382462	BICF2G630374931	18912399	30718357	11806	1069	NA	NA
S43	MA509	MA509	-9	23	BICF2P363035	CHR23_46424227	43292922	46424227	3131.31	360	2	1*
S43	MA510	MA510	-9	23	BICF2P363035	CHR23_46424227	43292922	46424227	3131.31	360	2	1
S43	MA512	MA512	-9	23	BICF2P363035	CHR23_46424227	43292922	46424227	3131.31	360	2	1
S43	CON	3	00:03:00	23	BICF2P363035	CHR23_46424227	43292922	46424227	3131.31	360	NA	NA
S43	UNION	3	00:03:00	23	BICF2P363035	CHR23_46424227	43292922	46424227	3131.31	360	NA	NA
S44	MA510	MA510	-9	24	BICF2G630510719	BICF2G630507459	10195920	14050235	3854.32	369	2	1*
S44	MA511	MA511	-9	24	BICF2G630510719	BICF2G630507459	10195920	14050235	3854.32	369	2	1
S44	MA512	MA512	-9	24	BICF2G630510719	BICF2G630507459	10195920	14050235	3854.32	369	2	1
S44	CON	3	00:03:00	24	BICF2G630510719	BICF2G630507459	10195920	14050235	3854.32	369	NA	NA
S44	UNION	3	00:03:00	24	BICF2G630510719	BICF2G630507459	10195920	14050235	3854.32	369	NA	NA
S45	MA509	MA509	-9	26	BICF2P754746	BICF2S22964998	28468662	32698604	4229.94	479	1	1*
S45	MA511	MA511	-9	26	BICF2P754746	BICF2S22964998	28468662	32698604	4229.94	479	1	1
S45	MA512	MA512	-9	26	BICF2P852904	CHR26_28745440	24596968	28745440	4148.47	274	0	2*
S45	CON	3	00:03:00	26	BICF2P754746	CHR26_28745440	28468662	28745440	276.779	40	NA	NA
S45	UNION	3	00:03:00	26	BICF2P852904	BICF2S22964998	24596968	32698604	8101.64	713	NA	NA
S46	MA509	MA509	-9	26	BICF2P754746	BICF2S22964998	28468662	32698604	4229.94	479	1	1*
S46	MA511	MA511	-9	26	BICF2P754746	BICF2S22964998	28468662	32698604	4229.94	479	1	1
S46	MA512	MA512	-9	26	BICF2P1010349	BICF2P1169214	31863083	33566746	1703.66	154	0	2*
S46	CON	3	00:03:00	26	BICF2P1010349	BICF2S22964998	31863083	32698604	835.522	81	NA	NA
S46	UNION	3	00:03:00	26	BICF2P754746	BICF2P1169214	28468662	33566746	5098.09	552	NA	NA
S47	MA509	MA509	-9	29	BICF2P936075	BICF2S23315342	21231095	24674350	3443.26	306	2	1*
S47	MA510	MA510	-9	29	TIGRP2P365965_RS8796340	BICF2P593182	16693692	21372889	4679.2	403	2	1
S47	MA512	MA512	-9	29	BICF2P936075	BICF2S23315342	21231095	24674350	3443.26	306	2	1
S47	CON	3	00:03:00	29	BICF2P936075	BICF2P593182	21231095	21372889	141.795	15	NA	NA
S47	UNION	3	00:03:00	29	TIGRP2P365965_RS8796340	BICF2S23315342	16693692	24674350	7980.66	694	NA	NA
S48	MA509	MA509	-9	31	BICF2P253191	CHR31_38944376	36352812	38944376	2591.57	336	2	1*
S48	MA510	MA510	-9	31	BICF2P253191	CHR31_38944376	36352812	38944376	2591.57	336	2	1
S48	MA512	MA512	-9	31	BICF2G630742301	CHR31_38490043	34824326	38490043	3665.72	449	2	1
S48	CON	3	00:03:00	31	BICF2P253191	CHR31_38490043	36352812	38490043	2137.23	279	NA	NA
S48	UNION	3	00:03:00	31	BICF2G630742301	CHR31_38944376	34824326	38944376	4120.05	506	NA	NA
S49	MA509	MA509	-9	33	BICF2P1118659	BICF2G63080276	16044760	18721243	2676.48	331	2	1*
S49	MA511	MA511	-9	33	BICF2P1118659	BICF2G63080276	16044760	18721243	2676.48	331	2	1
S49	MA512	MA512	-9	33	BICF2P1118659	BICF2G63080276	16044760	18721243	2676.48	331	2	1
S49	CON	3	00:03:00	33	BICF2P1118659	BICF2G63080276	16044760	18721243	2676.48	331	NA	NA
S49	UNION	3	00:03:00	33	BICF2P1118659	BICF2G63080276	16044760	18721243	2676.48	331	NA	NA
S50	MA509	MA509	-9	34	BICF2P1010320	TIGRP2P395952_RS8849227	11764377	19495156	7730.78	681	2	1*
S50	MA510	MA510	-9	34	TIGRP2P395952_RS8849227	TIGRP2P396995_RS8698866	19495156	23933144	4437.99	423	2	1
S50	MA511	MA511	-9	34	BICF2P1010320	TIGRP2P395952_RS8849227	11764377	19495156	7730.78	681	2	1
S50	CON	3	00:03:00	34	TIGRP2P395952_RS8849227	TIGRP2P395952_RS8849227	19495156	19495156	0.001	1	NA	NA
S50	UNION	3	00:03:00	34	BICF2P1010320	TIGRP2P396995_RS8698866	11764377	23933144	12168.8	1103	NA	NA
S51	MA509	MA509	-9	1	TIGRP2P12014_RS8907409	BICF2P931526	87100625	108348144	21247.5	2057	1	1*
S51	MA512	MA512	-9	1	BICF2G630790705	BICF2P180536	92349325	93410169	1060.85	102	1	1
S51	CON	2	00:02:00	1	BICF2G630790705	BICF2P180536	92349325	93410169	1060.85	102	NA	NA
S51	UNION	2	00:02:00	1	TIGRP2P12014_RS8907409	BICF2P931526	87100625	108348144	21247.5	2057	NA	NA
S52	MA509	MA509	-9	1	TIGRP2P12014_RS8907409	BICF2P931526	87100625	108348144	21247.5	2057	0	1*
S52	MA511	MA511	-9	1	BICF2P943022	CHR1_100378036	98659423	100378036	1718.61	146	0	2*
S52	CON	2	00:02:00	1	BICF2P943022	CHR1_100378036	98659423	100378036	1718.61	146	NA	NA
S52	UNION	2	00:02:00	1	TIGRP2P12014_RS8907409	BICF2P931526	87100625	108348144	21247.5	2057	NA	NA
S53	MA509	MA509	-9	1	CHR1_115014646	BICF2S23429870	115014646	116226799	1212.15	131	1	1*
S53	MA510	MA510	-9	1	CHR1_111914774	BICF2P1393253	111914774	118820170	6905.4	821	1	1
S53	CON	2	00:02:00	1	CHR1_115014646	BICF2S23429870	115014646	116226799	1212.15	131	NA	NA
S53	UNION	2	00:02:00	1	CHR1_111914774	BICF2P1393253	111914774	118820170	6905.4	821	NA	NA
S54	MA509	MA509	-9	1	BICF2P1322000	BICF2S23226229	120103825	122118676	2014.85	221	1	1*
S54	MA510	MA510	-9	1	BICF2P1322000	BICF2S23226229	120103825	122118676	2014.85	221	1	1
S54	CON	2	00:02:00	1	BICF2P1322000	BICF2S23226229	120103825	122118676	2014.85	221	NA	NA
S54	UNION	2	00:02:00	1	BICF2P1322000	BICF2S23226229	120103825	122118676	2014.85	221	NA	NA
S55	MA509	MA509	-9	2	BICF2G630786965	BICF2G630786564	2240476	3599127	1358.65	115	1	1*
S55	MA510	MA510	-9	2	BICF2G630786965	BICF2G630786564	2240476	3599127	1358.65	115	1	1
S55	CON	2	00:02:00	2	BICF2G630786965	BICF2G630786564	2240476	3599127	1358.65	115	NA	NA
S55	UNION	2	00:02:00	2	BICF2G630786965	BICF2G630786564	2240476	3599127	1358.65	115	NA	NA
S56	MA509	MA509	-9	3	BICF2P1024218	TIGRP2P49338_RS8816394	61316046	62975980	1659.93	173	1	1*
S56	MA510	MA510	-9	3	BICF2P1024218	CHR3_62959840	61316046	62959840	1643.8	170	1	1
S56	CON	2	00:02:00	3	BICF2P1024218	CHR3_62959840	61316046	62959840	1643.8	170	NA	NA
S56	UNION	2	00:02:00	3	BICF2P1024218	TIGRP2P49338_RS8816394	61316046	62975980	1659.93	173	NA	NA
S57	MA509	MA509	-9	3	BICF2G630351560	BICF2P619275	76929122	79050149	2121.03	190	1	1*
S57	MA510	MA510	-9	3	BICF2G630351560	BICF2P619275	76929122	79050149	2121.03	190	1	1
S57	CON	2	00:02:00	3	BICF2G630351560	BICF2P619275	76929122	79050149	2121.03	190	NA	NA
S57	UNION	2	00:02:00	3	BICF2G630351560	BICF2P619275	76929122	79050149	2121.03	190	NA	NA
S58	MA510	MA510	-9	3	BICF2G630360725	BICF2S22917226	90209242	91858198	1648.96	163	1	1*
S58	MA512	MA512	-9	3	TIGRP2P55107_RS8536869	BICF2S22917226	84841663	91858198	7016.54	699	1	1
S58	CON	2	00:02:00	3	BICF2G630360725	BICF2S22917226	90209242	91858198	1648.96	163	NA	NA
S58	UNION	2	00:02:00	3	TIGRP2P55107_RS8536869	BICF2S22917226	84841663	91858198	7016.54	699	NA	NA
S59	MA509	MA509	-9	5	TIGRP2P69712_RS9034523	BICF2P380109	22390631	24047909	1657.28	134	1	1*
S59	MA512	MA512	-9	5	TIGRP2P69712_RS9034523	BICF2P380109	22390631	24047909	1657.28	134	1	1
S59	CON	2	00:02:00	5	TIGRP2P69712_RS9034523	BICF2P380109	22390631	24047909	1657.28	134	NA	NA
S59	UNION	2	00:02:00	5	TIGRP2P69712_RS9034523	BICF2P380109	22390631	24047909	1657.28	134	NA	NA
S60	MA509	MA509	-9	5	BICF2G630183204	BICF2P470453	33197053	34204786	1007.73	110	1	1*
S60	MA511	MA511	-9	5	BICF2G630183204	BICF2P470453	33197053	34204786	1007.73	110	1	1
S60	CON	2	00:02:00	5	BICF2G630183204	BICF2P470453	33197053	34204786	1007.73	110	NA	NA
S60	UNION	2	00:02:00	5	BICF2G630183204	BICF2P470453	33197053	34204786	1007.73	110	NA	NA
S61	MA509	MA509	-9	5	BICF2G630185121	TIGRP2P70542_RS9158013	36943096	38642620	1699.53	161	1	1*
S61	MA511	MA511	-9	5	BICF2G630185121	TIGRP2P70542_RS9158013	36943096	38642620	1699.53	161	1	1
S61	CON	2	00:02:00	5	BICF2G630185121	TIGRP2P70542_RS9158013	36943096	38642620	1699.53	161	NA	NA
S61	UNION	2	00:02:00	5	BICF2G630185121	TIGRP2P70542_RS9158013	36943096	38642620	1699.53	161	NA	NA
S62	MA509	MA509	-9	5	BICF2G630187147	BICF2P741610	43842121	48409606	4567.49	418	1	1*
S62	MA511	MA511	-9	5	BICF2G630187147	BICF2P741610	43842121	48409606	4567.49	418	1	1
S62	CON	2	00:02:00	5	BICF2G630187147	BICF2P741610	43842121	48409606	4567.49	418	NA	NA
S62	UNION	2	00:02:00	5	BICF2G630187147	BICF2P741610	43842121	48409606	4567.49	418	NA	NA
S63	MA511	MA511	-9	5	CHR5_66345106	BICF2G630241596	66345106	67840407	1495.3	161	0	1*
S63	MA512	MA512	-9	5	BICF2G630241993	BICF2S23029870	67212331	72699784	5487.45	591	0	2*
S63	CON	2	00:02:00	5	BICF2G630241993	BICF2G630241596	67212331	67840407	628.077	79	NA	NA
S63	UNION	2	00:02:00	5	CHR5_66345106	BICF2S23029870	66345106	72699784	6354.68	673	NA	NA
S64	MA509	MA509	-9	5	BICF2G630241272	BICF2G630240203	68047405	69162790	1115.39	137	1	1*
S64	MA512	MA512	-9	5	BICF2G630241993	BICF2S23029870	67212331	72699784	5487.45	591	1	1
S64	CON	2	00:02:00	5	BICF2G630241272	BICF2G630240203	68047405	69162790	1115.39	137	NA	NA
S64	UNION	2	00:02:00	5	BICF2G630241993	BICF2S23029870	67212331	72699784	5487.45	591	NA	NA
S65	MA510	MA510	-9	5	BICF2P70507	CHR5_78284019	75222080	78284019	3061.94	341	1	1*
S65	MA512	MA512	-9	5	BICF2P344950	BICF2P478495	74249338	75265351	1016.01	103	1	1
S65	CON	2	00:02:00	5	BICF2P70507	BICF2P478495	75222080	75265351	43.272	16	NA	NA
S65	UNION	2	00:02:00	5	BICF2P344950	CHR5_78284019	74249338	78284019	4034.68	428	NA	NA
S66	MA510	MA510	-9	5	BICF2P70507	CHR5_78284019	75222080	78284019	3061.94	341	1	1*
S66	MA511	MA511	-9	5	BICF2P445715	BICF2P924797	75720245	79405250	3685.01	363	1	1
S66	CON	2	00:02:00	5	BICF2P445715	CHR5_78284019	75720245	78284019	2563.78	272	NA	NA
S66	UNION	2	00:02:00	5	BICF2P70507	BICF2P924797	75222080	79405250	4183.17	432	NA	NA
S67	MA510	MA510	-9	6	CHRUN_JH373280_120421	TIGRP2P85630_RS9243498	15628	5612761	5597.13	443	1	1*
S67	MA512	MA512	-9	6	CHRUN_JH373280_120421	TIGRP2P85630_RS9243498	15628	5612761	5597.13	443	1	1
S67	CON	2	00:02:00	6	CHRUN_JH373280_120421	TIGRP2P85630_RS9243498	15628	5612761	5597.13	443	NA	NA
S67	UNION	2	00:02:00	6	CHRUN_JH373280_120421	TIGRP2P85630_RS9243498	15628	5612761	5597.13	443	NA	NA
S68	MA509	MA509	-9	6	BICF2S23151843	BICF2G630573116	58725946	65071878	6345.93	616	1	1*
S68	MA512	MA512	-9	6	BICF2S23151843	BICF2G630573116	58725946	65071878	6345.93	616	1	1
S68	CON	2	00:02:00	6	BICF2S23151843	BICF2G630573116	58725946	65071878	6345.93	616	NA	NA
S68	UNION	2	00:02:00	6	BICF2S23151843	BICF2G630573116	58725946	65071878	6345.93	616	NA	NA
S69	MA509	MA509	-9	7	CHR7_321088	BICF2S23033570	321088	2721658	2400.57	204	1	1*
S69	MA511	MA511	-9	7	BICF2S2336345	BICF2G630550357	416	7872515	7872.1	782	1	1
S69	CON	2	00:02:00	7	CHR7_321088	BICF2S23033570	321088	2721658	2400.57	204	NA	NA
S69	UNION	2	00:02:00	7	BICF2S2336345	BICF2G630550357	416	7872515	7872.1	782	NA	NA
S70	MA509	MA509	-9	7	BICF2P1345221	BICF2P1335165	71590258	73570978	1980.72	179	1	1*
S70	MA511	MA511	-9	7	BICF2P1345221	BICF2P1335165	71590258	73570978	1980.72	179	1	1
S70	CON	2	00:02:00	7	BICF2P1345221	BICF2P1335165	71590258	73570978	1980.72	179	NA	NA
S70	UNION	2	00:02:00	7	BICF2P1345221	BICF2P1335165	71590258	73570978	1980.72	179	NA	NA
S71	MA511	MA511	-9	8	TIGRP2P108667_RS9077760	TIGRP2P110933_RS9163973	17972442	25700244	7727.8	589	1	1*
S71	MA512	MA512	-9	8	TIGRP2P108667_RS9077760	TIGRP2P110933_RS9163973	17972442	25700244	7727.8	589	1	1
S71	CON	2	00:02:00	8	TIGRP2P108667_RS9077760	TIGRP2P110933_RS9163973	17972442	25700244	7727.8	589	NA	NA
S71	UNION	2	00:02:00	8	TIGRP2P108667_RS9077760	TIGRP2P110933_RS9163973	17972442	25700244	7727.8	589	NA	NA
S72	MA509	MA509	-9	8	BICF2P512356	CHR8_34499299	32683460	34499299	1815.84	154	1	1*
S72	MA510	MA510	-9	8	BICF2P653267	BICF2P915854	31599902	34792679	3192.78	267	1	1
S72	CON	2	00:02:00	8	BICF2P512356	CHR8_34499299	32683460	34499299	1815.84	154	NA	NA
S72	UNION	2	00:02:00	8	BICF2P653267	BICF2P915854	31599902	34792679	3192.78	267	NA	NA
S73	MA510	MA510	-9	10	CHR10_15736576	G586F25S4	15736576	16915046	1178.47	104	1	1*
S73	MA511	MA511	-9	10	CHR10_15736576	G586F25S4	15736576	16915046	1178.47	104	1	1
S73	CON	2	00:02:00	10	CHR10_15736576	G586F25S4	15736576	16915046	1178.47	104	NA	NA
S73	UNION	2	00:02:00	10	CHR10_15736576	G586F25S4	15736576	16915046	1178.47	104	NA	NA
S74	MA510	MA510	-9	10	BICF2G630479205	BICF2G630481131	21379486	26888724	5509.24	617	1	1*
S74	MA511	MA511	-9	10	BICF2G630479205	BICF2G630481131	21379486	26888724	5509.24	617	1	1
S74	CON	2	00:02:00	10	BICF2G630479205	BICF2G630481131	21379486	26888724	5509.24	617	NA	NA
S74	UNION	2	00:02:00	10	BICF2G630479205	BICF2G630481131	21379486	26888724	5509.24	617	NA	NA
S75	MA510	MA510	-9	10	BICF2S2451230	BICF2P843879	50291015	51834749	1543.73	139	1	1*
S75	MA511	MA511	-9	10	BICF2S2451230	BICF2P843879	50291015	51834749	1543.73	139	1	1
S75	CON	2	00:02:00	10	BICF2S2451230	BICF2P843879	50291015	51834749	1543.73	139	NA	NA
S75	UNION	2	00:02:00	10	BICF2S2451230	BICF2P843879	50291015	51834749	1543.73	139	NA	NA
S76	MA509	MA509	-9	10	BICF2S23623994	CHR10_64548620	62267699	64548620	2280.92	185	1	1*
S76	MA511	MA511	-9	10	BICF2S23623994	CHR10_64548620	62267699	64548620	2280.92	185	1	1
S76	CON	2	00:02:00	10	BICF2S23623994	CHR10_64548620	62267699	64548620	2280.92	185	NA	NA
S76	UNION	2	00:02:00	10	BICF2S23623994	CHR10_64548620	62267699	64548620	2280.92	185	NA	NA
S77	MA509	MA509	-9	11	BICF2S23553865	BICF2G630296286	18662547	21276357	2613.81	243	1	1*
S77	MA510	MA510	-9	11	BICF2S23553865	BICF2S232456	18662547	54781330	36118.8	3037	1	1
S77	CON	2	00:02:00	11	BICF2S23553865	BICF2G630296286	18662547	21276357	2613.81	243	NA	NA
S77	UNION	2	00:02:00	11	BICF2S23553865	BICF2S232456	18662547	54781330	36118.8	3037	NA	NA
S78	MA509	MA509	-9	12	CHR12_5589209	BICF2S2373330	5589209	7787975	2198.77	227	1	1*
S78	MA510	MA510	-9	12	BICF2P391911	BICF2S2373330	3991	7787975	7783.98	1067	1	1
S78	CON	2	00:02:00	12	CHR12_5589209	BICF2S2373330	5589209	7787975	2198.77	227	NA	NA
S78	UNION	2	00:02:00	12	BICF2P391911	BICF2S2373330	3991	7787975	7783.98	1067	NA	NA
S79	MA510	MA510	-9	13	BICF2P1270259	BICF2G630603545	3415394	4596947	1181.55	100	1	1*
S79	MA511	MA511	-9	13	BICF2P1270259	BICF2G630603545	3415394	4596947	1181.55	100	1	1
S79	CON	2	00:02:00	13	BICF2P1270259	BICF2G630603545	3415394	4596947	1181.55	100	NA	NA
S79	UNION	2	00:02:00	13	BICF2P1270259	BICF2G630603545	3415394	4596947	1181.55	100	NA	NA
S80	MA511	MA511	-9	14	BICF2G630517799	TIGRP2P190650_RS9033748	2802415	28619321	25816.9	2243	1	1*
S80	MA512	MA512	-9	14	BICF2P232113	CHR14_14776756	13003763	14776756	1772.99	167	1	1
S80	CON	2	00:02:00	14	BICF2P232113	CHR14_14776756	13003763	14776756	1772.99	167	NA	NA
S80	UNION	2	00:02:00	14	BICF2G630517799	TIGRP2P190650_RS9033748	2802415	28619321	25816.9	2243	NA	NA
S81	MA510	MA510	-9	15	BICF2P309038	BICF2S23049722	4716989	6822208	2105.22	165	1	1*
S81	MA512	MA512	-9	15	BICF2P309038	BICF2G630444556	4716989	7078439	2361.45	189	1	1
S81	CON	2	00:02:00	15	BICF2P309038	BICF2S23049722	4716989	6822208	2105.22	165	NA	NA
S81	UNION	2	00:02:00	15	BICF2P309038	BICF2G630444556	4716989	7078439	2361.45	189	NA	NA
S82	MA510	MA510	-9	15	BICF2S23534474	CHR15_25016941	10134767	25016941	14882.2	1388	1	1*
S82	MA512	MA512	-9	15	BICF2P254355	BICF2G630442358	10704019	13033643	2329.62	195	1	1
S82	CON	2	00:02:00	15	BICF2P254355	BICF2G630442358	10704019	13033643	2329.62	195	NA	NA
S82	UNION	2	00:02:00	15	BICF2S23534474	CHR15_25016941	10134767	25016941	14882.2	1388	NA	NA
S83	MA509	MA509	-9	15	BICF2S2327360	BICF2P695538	40194797	41625947	1431.15	144	1	1*
S83	MA510	MA510	-9	15	BICF2P761980	BICF2P695538	32604211	41625947	9021.74	792	1	1
S83	CON	2	00:02:00	15	BICF2S2327360	BICF2P695538	40194797	41625947	1431.15	144	NA	NA
S83	UNION	2	00:02:00	15	BICF2P761980	BICF2P695538	32604211	41625947	9021.74	792	NA	NA
S84	MA511	MA511	-9	15	BICF2P1126312	BICF2S22913172	52065572	63454481	11388.9	1018	1	1*
S84	MA512	MA512	-9	15	TIGRP2P206233_RS8689696	BICF2P929880	58409663	61882412	3472.75	312	1	1
S84	CON	2	00:02:00	15	TIGRP2P206233_RS8689696	BICF2P929880	58409663	61882412	3472.75	312	NA	NA
S84	UNION	2	00:02:00	15	BICF2P1126312	BICF2S22913172	52065572	63454481	11388.9	1018	NA	NA
S85	MA509	MA509	-9	16	BICF2P546717	BICF2G630848341	15798246	17143340	1345.1	106	1	1*
S85	MA511	MA511	-9	16	BICF2P546717	BICF2G630848341	15798246	17143340	1345.1	106	1	1
S85	CON	2	00:02:00	16	BICF2P546717	BICF2G630848341	15798246	17143340	1345.1	106	NA	NA
S85	UNION	2	00:02:00	16	BICF2P546717	BICF2G630848341	15798246	17143340	1345.1	106	NA	NA
S86	MA509	MA509	-9	17	BICF2P1369289	BICF2S23716614	51048	18452059	18401	1712	0	1*
S86	MA510	MA510	-9	17	BICF2P507063	BICF2G630220746	4577389	9994270	5416.88	503	0	2*
S86	CON	2	00:02:00	17	BICF2P507063	BICF2G630220746	4577389	9994270	5416.88	503	NA	NA
S86	UNION	2	00:02:00	17	BICF2P1369289	BICF2S23716614	51048	18452059	18401	1712	NA	NA
S87	MA510	MA510	-9	20	BICF2G630228427	CHR20_4753469	3663517	4753469	1089.95	121	1	1*
S87	MA511	MA511	-9	20	BICF2G630228427	CHR20_4753469	3663517	4753469	1089.95	121	1	1
S87	CON	2	00:02:00	20	BICF2G630228427	CHR20_4753469	3663517	4753469	1089.95	121	NA	NA
S87	UNION	2	00:02:00	20	BICF2G630228427	CHR20_4753469	3663517	4753469	1089.95	121	NA	NA
S88	MA510	MA510	-9	20	BICF2P154782	BICF2G630232190	10758499	19864403	9105.91	817	1	1*
S88	MA511	MA511	-9	20	BICF2P154782	BICF2G630232190	10758499	19864403	9105.91	817	1	1
S88	CON	2	00:02:00	20	BICF2P154782	BICF2G630232190	10758499	19864403	9105.91	817	NA	NA
S88	UNION	2	00:02:00	20	BICF2P154782	BICF2G630232190	10758499	19864403	9105.91	817	NA	NA
S89	MA509	MA509	-9	20	BICF2G630233734	TIGRP2P273676_RS8696164	21823265	25219712	3396.45	311	1	1*
S89	MA512	MA512	-9	20	BICF2G630233734	TIGRP2P273676_RS8696164	21823265	25219712	3396.45	311	1	1
S89	CON	2	00:02:00	20	BICF2G630233734	TIGRP2P273676_RS8696164	21823265	25219712	3396.45	311	NA	NA
S89	UNION	2	00:02:00	20	BICF2G630233734	TIGRP2P273676_RS8696164	21823265	25219712	3396.45	311	NA	NA
S90	MA509	MA509	-9	22	CHR22_31414386	BICF2G630328497	31414386	34244751	2830.37	228	1	1*
S90	MA510	MA510	-9	22	BICF2G630328440	BICF2S23335743	34083431	42542711	8459.28	690	1	1
S90	CON	2	00:02:00	22	BICF2G630328440	BICF2G630328497	34083431	34244751	161.321	13	NA	NA
S90	UNION	2	00:02:00	22	CHR22_31414386	BICF2S23335743	31414386	42542711	11128.3	905	NA	NA
S91	MA510	MA510	-9	22	BICF2G630328440	BICF2S23335743	34083431	42542711	8459.28	690	0	1*
S91	MA512	MA512	-9	22	BICF2G630330501	BICF2G630332272	37455291	39155814	1700.52	143	0	2*
S91	CON	2	00:02:00	22	BICF2G630330501	BICF2G630332272	37455291	39155814	1700.52	143	NA	NA
S91	UNION	2	00:02:00	22	BICF2G630328440	BICF2S23335743	34083431	42542711	8459.28	690	NA	NA
S92	MA510	MA510	-9	24	BICF2P236642	BICF2P754854	22642681	24395644	1752.96	143	1	1*
S92	MA512	MA512	-9	24	BICF2P236642	BICF2P754854	22642681	24395644	1752.96	143	1	1
S92	CON	2	00:02:00	24	BICF2P236642	BICF2P754854	22642681	24395644	1752.96	143	NA	NA
S92	UNION	2	00:02:00	24	BICF2P236642	BICF2P754854	22642681	24395644	1752.96	143	NA	NA
S93	MA509	MA509	-9	25	TIGRP2P335856_RS8988095	BICF2P1033853	2548504	4775971	2227.47	180	1	1*
S93	MA510	MA510	-9	25	TIGRP2P335854_RS8738742	BICF2P1033853	2544829	4775971	2231.14	181	1	1
S93	CON	2	00:02:00	25	TIGRP2P335856_RS8988095	BICF2P1033853	2548504	4775971	2227.47	180	NA	NA
S93	UNION	2	00:02:00	25	TIGRP2P335854_RS8738742	BICF2P1033853	2544829	4775971	2231.14	181	NA	NA
S94	MA509	MA509	-9	26	BICF2S23137422	BICF2P203104	13307763	16863978	3556.22	387	1	1*
S94	MA511	MA511	-9	26	BICF2S22918266	CHR26_13637487	12545439	13637487	1092.05	106	1	1
S94	CON	2	00:02:00	26	BICF2S23137422	CHR26_13637487	13307763	13637487	329.725	38	NA	NA
S94	UNION	2	00:02:00	26	BICF2S22918266	BICF2P203104	12545439	16863978	4318.54	455	NA	NA
S95	MA509	MA509	-9	26	BICF2S23137422	BICF2P203104	13307763	16863978	3556.22	387	1	1*
S95	MA510	MA510	-9	26	CHR26_16827114	CHR26_25753306	16827114	25753306	8926.19	916	1	1
S95	CON	2	00:02:00	26	CHR26_16827114	BICF2P203104	16827114	16863978	36.865	11	NA	NA
S95	UNION	2	00:02:00	26	BICF2S23137422	CHR26_25753306	13307763	25753306	12445.5	1292	NA	NA
S96	MA510	MA510	-9	26	CHR26_16827114	CHR26_25753306	16827114	25753306	8926.19	916	0	1*
S96	MA511	MA511	-9	26	CHR26_17240181	BICF2G630799824	17240181	19156606	1916.43	245	0	2*
S96	CON	2	00:02:00	26	CHR26_17240181	BICF2G630799824	17240181	19156606	1916.43	245	NA	NA
S96	UNION	2	00:02:00	26	CHR26_16827114	CHR26_25753306	16827114	25753306	8926.19	916	NA	NA
S97	MA510	MA510	-9	26	CHR26_16827114	CHR26_25753306	16827114	25753306	8926.19	916	1	1*
S97	MA512	MA512	-9	26	BICF2G630799563	BICF2G630798236	19582305	20696667	1114.36	140	1	1
S97	CON	2	00:02:00	26	BICF2G630799563	BICF2G630798236	19582305	20696667	1114.36	140	NA	NA
S97	UNION	2	00:02:00	26	CHR26_16827114	CHR26_25753306	16827114	25753306	8926.19	916	NA	NA
S98	MA510	MA510	-9	26	CHR26_16827114	CHR26_25753306	16827114	25753306	8926.19	916	0	1*
S98	MA511	MA511	-9	26	BICF2S23451309	CHR26_23635159	22623983	23635159	1011.18	129	0	2*
S98	CON	2	00:02:00	26	BICF2S23451309	CHR26_23635159	22623983	23635159	1011.18	129	NA	NA
S98	UNION	2	00:02:00	26	CHR26_16827114	CHR26_25753306	16827114	25753306	8926.19	916	NA	NA
S99	MA510	MA510	-9	26	CHR26_16827114	CHR26_25753306	16827114	25753306	8926.19	916	1	1*
S99	MA512	MA512	-9	26	BICF2P852904	CHR26_28745440	24596968	28745440	4148.47	274	1	1
S99	CON	2	00:02:00	26	BICF2P852904	CHR26_25753306	24596968	25753306	1156.34	46	NA	NA
S99	UNION	2	00:02:00	26	CHR26_16827114	CHR26_28745440	16827114	28745440	11918.3	1144	NA	NA
S100	MA509	MA509	-9	27	CHR27_1010257	BICF2G630138780	1010257	3082659	2072.4	305	1	1*
S100	MA510	MA510	-9	27	CHR27_1901185	BICF2G630138780	1901185	3082659	1181.47	199	1	1
S100	CON	2	00:02:00	27	CHR27_1901185	BICF2G630138780	1901185	3082659	1181.47	199	NA	NA
S100	UNION	2	00:02:00	27	CHR27_1010257	BICF2G630138780	1010257	3082659	2072.4	305	NA	NA
S101	MA510	MA510	-9	28	BICF2P318642	TIGRP2P278766_RS8517909	35775968	41175293	5399.33	586	1	1*
S101	MA512	MA512	-9	28	CHR28_39453920	TIGRP2P278766_RS8517909	39453920	41175293	1721.37	215	1	1
S101	CON	2	00:02:00	28	CHR28_39453920	TIGRP2P278766_RS8517909	39453920	41175293	1721.37	215	NA	NA
S101	UNION	2	00:02:00	28	BICF2P318642	TIGRP2P278766_RS8517909	35775968	41175293	5399.33	586	NA	NA
S102	MA510	MA510	-9	30	BICF2G630412478	BICF2P290398	951744	3432479	2480.74	234	1	1*
S102	MA512	MA512	-9	30	TIGRP2P368899_RS8700617	BICF2G630412143	508000	2045879	1537.88	150	1	1
S102	CON	2	00:02:00	30	BICF2G630412478	BICF2G630412143	951744	2045879	1094.14	113	NA	NA
S102	UNION	2	00:02:00	30	TIGRP2P368899_RS8700617	BICF2P290398	508000	3432479	2924.48	271	NA	NA
S103	MA510	MA510	-9	31	BICF2S23447377	BICF2P70517	9567	10903795	10894.2	906	1	1*
S103	MA512	MA512	-9	31	BICF2S23447377	BICF2P70517	9567	10903795	10894.2	906	1	1
S103	CON	2	00:02:00	31	BICF2S23447377	BICF2P70517	9567	10903795	10894.2	906	NA	NA
S103	UNION	2	00:02:00	31	BICF2S23447377	BICF2P70517	9567	10903795	10894.2	906	NA	NA
S104	MA509	MA509	-9	31	BICF2S2373860	BICF2G630734212	12798772	16900226	4101.45	340	0	1*
S104	MA511	MA511	-9	31	BICF2P672423	BICF2G630733475	12286078	16142957	3856.88	319	0	2*
S104	CON	2	00:02:00	31	BICF2S2373860	BICF2G630733475	12798772	16142957	3344.19	284	NA	NA
S104	UNION	2	00:02:00	31	BICF2P672423	BICF2G630734212	12286078	16900226	4614.15	375	NA	NA
S105	MA509	MA509	-9	32	BICF2G630599504	BICF2S23417140	6471668	8689969	2218.3	225	1	1*
S105	MA510	MA510	-9	32	BICF2G630599504	BICF2S23417140	6471668	8689969	2218.3	225	1	1
S105	CON	2	00:02:00	32	BICF2G630599504	BICF2S23417140	6471668	8689969	2218.3	225	NA	NA
S105	UNION	2	00:02:00	32	BICF2G630599504	BICF2S23417140	6471668	8689969	2218.3	225	NA	NA
S106	MA509	MA509	-9	32	BICF2G630588907	BICF2S2351908	23760945	25386853	1625.91	134	1	1*
S106	MA510	MA510	-9	32	BICF2G630588907	BICF2S2351908	23760945	25386853	1625.91	134	1	1
S106	CON	2	00:02:00	32	BICF2G630588907	BICF2S2351908	23760945	25386853	1625.91	134	NA	NA
S106	UNION	2	00:02:00	32	BICF2G630588907	BICF2S2351908	23760945	25386853	1625.91	134	NA	NA
S107	MA510	MA510	-9	34	BICF2S23260424	TIGRP2P399556_RS9043441	25224687	34408641	9183.95	844	0	1*
S107	MA512	MA512	-9	34	CHR34_27454151	BICF2G630456104	27454151	29380749	1926.6	167	0	2*
S107	CON	2	00:02:00	34	CHR34_27454151	BICF2G630456104	27454151	29380749	1926.6	167	NA	NA
S107	UNION	2	00:02:00	34	BICF2S23260424	TIGRP2P399556_RS9043441	25224687	34408641	9183.95	844	NA	NA
S108	MA509	MA509	-9	34	CHR34_32467909	TIGRP2P400753_RS8936531	32467909	38847381	6379.47	632	1	1*
S108	MA510	MA510	-9	34	BICF2S23260424	TIGRP2P399556_RS9043441	25224687	34408641	9183.95	844	1	1
S108	CON	2	00:02:00	34	CHR34_32467909	TIGRP2P399556_RS9043441	32467909	34408641	1940.73	182	NA	NA
S108	UNION	2	00:02:00	34	BICF2S23260424	TIGRP2P400753_RS8936531	25224687	38847381	13622.7	1294	NA	NA
S109	MA509	MA509	-9	35	BICF2G630778686	BICF2S23619026	22198393	24415540	2217.15	301	1	1*
S109	MA512	MA512	-9	35	BICF2G630778686	BICF2G630780653	22198393	24191758	1993.37	260	1	1
S109	CON	2	00:02:00	35	BICF2G630778686	BICF2G630780653	22198393	24191758	1993.37	260	NA	NA
S109	UNION	2	00:02:00	35	BICF2G630778686	BICF2S23619026	22198393	24415540	2217.15	301	NA	NA
S110	MA510	MA510	-9	36	BICF2P655602	BICF2P807466	1756122	10797885	9041.76	817	1	1*
S110	MA511	MA511	-9	36	BICF2P655602	BICF2P807466	1756122	10797885	9041.76	817	1	1
S110	CON	2	00:02:00	36	BICF2P655602	BICF2P807466	1756122	10797885	9041.76	817	NA	NA
S110	UNION	2	00:02:00	36	BICF2P655602	BICF2P807466	1756122	10797885	9041.76	817	NA	NA
S111	MA511	MA511	-9	37	BICF2P1090310	BICF2P482008	2412848	3976526	1563.68	117	0	1*
S111	MA512	MA512	-9	37	BICF2S23136719	BICF2S23419091	20049	16988856	16968.8	1589	0	2*
S111	CON	2	00:02:00	37	BICF2P1090310	BICF2P482008	2412848	3976526	1563.68	117	NA	NA
S111	UNION	2	00:02:00	37	BICF2S23136719	BICF2S23419091	20049	16988856	16968.8	1589	NA	NA
S112	MA511	MA511	-9	37	BICF2P216360	BICF2P1039087	13195839	16983632	3787.79	367	0	1*
S112	MA512	MA512	-9	37	BICF2S23136719	BICF2S23419091	20049	16988856	16968.8	1589	0	2*
S112	CON	2	00:02:00	37	BICF2P216360	BICF2P1039087	13195839	16983632	3787.79	367	NA	NA
S112	UNION	2	00:02:00	37	BICF2S23136719	BICF2S23419091	20049	16988856	16968.8	1589	NA	NA

## Sheet: Homozygosity visual Chr. 4
Chromosome 4 genotypes of the 10 dogs from the index family (tped-file). The four affected dogs are highlighted in red. The shared homozygous interval is highlighted in yellow (lines 2682-7482).
CHROM	MARKER	POSITION	MA507	MA507	MA508	MA508	MA509	MA509	MA510	MA510	MA511	MA511	MA512	MA512	MA513	MA513	MA514	MA514	MA515	MA515	MA516	MA516	Remarks
4	TIGRP2P56999_RS9113643	25084	1	1	1	1	1	1	1	1	1	1	1	1	1	1	1	1	1	1	1	1
4	BICF2P1032326	43598	4	4	4	4	4	4	4	4	4	4	4	4	4	4	4	4	4	4	4	4
4	BICF2P1237007	57259	3	3	3	3	3	3	3	3	3	3	3	3	3	3	3	3	3	3	3	3
4	BICF2P90365	61680	1	1	1	1	1	1	1	1	1	1	1	1	1	1	1	1	1	1	1	1
4	CHR4_70424	70424	3	3	3	3	3	3	3	3	3	3	3	3	3	3	3	3	3	3	3	3
4	CHR4_70580	70580	3	3	3	3	3	3	3	3	3	3	3	3	3	3	3	3	3	3	3	3
4	BICF2P1243436	71646	3	3	3	3	3	3	3	3	3	3	3	3	3	3	3	3	3	3	3	3
4	BICF2P634431	90537	3	3	3	3	3	3	3	3	3	3	3	3	3	3	3	3	3	3	3	3
4	BICF2G63056642	104900	1	1	1	1	1	1	1	1	1	1	1	1	1	1	1	1	1	1	1	1
4	TIGRP2P57026_RS8641993	116713	2	2	2	2	2	2	2	2	2	2	2	2	2	2	2	2	2	2	2	2
4	BICF2G63056643	118159	4	4	4	4	4	4	4	4	4	4	4	4	4	4	4	4	4	4	4	4
4	BICF2P1414175	118861	1	4	4	4	1	4	1	4	1	4	1	4	4	4	4	4	4	4	4	4
4	BICF2G63056646	131106	4	4	4	4	4	4	4	4	4	4	4	4	4	4	4	4	4	4	4	4
4	CHR4_131247	131247	2	2	2	2	2	2	2	2	2	2	2	2	2	2	2	2	2	2	2	2
4	CHR4_133417	133417	1	3	3	3	1	3	1	3	1	3	1	3	3	3	3	3	3	3	3	3
4	BICF2P74070	156501	2	2	2	2	2	2	2	2	2	2	2	2	2	2	2	2	2	2	2	2
4	BICF2P1099588	173108	1	3	3	3	1	3	1	3	1	3	1	3	3	3	3	3	3	3	3	3
4	BICF2G63056650	176026	2	2	2	2	2	2	2	2	2	2	2	2	2	2	2	2	2	2	2	2
4	TIGRP2P57040_RS9146821	203440	3	3	3	3	3	3	3	3	3	3	3	3	3	3	3	3	3	3	3	3
4	BICF2P639518	229987	4	4	4	4	4	4	4	4	4	4	4	4	4	4	4	4	4	4	4	4
4	BICF2G63056657	242353	3	3	3	3	3	3	3	3	3	3	3	3	3	3	3	3	3	3	3	3
4	TIGRP2P57049_RS9189804	243417	1	1	1	1	1	1	1	1	1	1	1	1	1	1	1	1	1	1	1	1
4	BICF2G63056659	259840	3	3	3	3	3	3	3	3	3	3	3	3	3	3	3	3	3	3	3	3
4	CHR4_260746	260746	2	2	2	2	2	2	2	2	2	2	2	2	2	2	2	2	2	2	2	2
4	BICF2P171815	266596	2	2	2	2	2	2	2	2	2	2	2	2	2	2	2	2	2	2	2	2
4	BICF2P859986	287134	3	3	3	3	3	3	3	3	3	3	3	3	3	3	3	3	3	3	3	3
4	BICF2P1382174	296504	2	2	2	2	2	2	2	2	2	2	2	2	2	2	2	2	2	2	2	2
4	BICF2P1358409	311969	2	2	2	2	2	2	2	2	2	2	2	2	2	2	2	2	2	2	2	2
4	BICF2P470947	332389	3	3	3	3	3	3	3	3	3	3	3	3	3	3	3	3	3	3	3	3
4	CHR4_341381	341381	2	2	2	2	2	2	2	2	2	2	2	2	2	2	2	2	2	2	2	2
4	CHR4_342393	342393	5	5	5	5	5	5	5	5	5	5	5	5	5	5	5	5	5	5	5	5
4	CHR4_344393	344393	2	2	2	2	2	2	2	2	2	2	2	2	2	2	2	2	2	2	2	2
4	BICF2G63056667	349335	4	4	4	4	4	4	4	4	4	4	4	4	4	4	4	4	4	4	4	4
4	CHR4_351000	351000	1	1	1	1	1	1	1	1	1	1	1	1	1	1	1	1	1	1	1	1
4	BICF2P1110262	364424	4	4	4	4	4	4	4	4	4	4	4	4	4	4	4	4	4	4	4	4
4	BICF2P307961	375613	3	3	3	3	3	3	3	3	3	3	3	3	3	3	3	3	3	3	3	3
4	CHR4_395473	395473	3	3	3	3	3	3	3	3	3	3	3	3	3	3	3	3	3	3	3	3
4	BICF2P954830	414996	1	1	2	1	2	1	2	1	2	1	1	1	2	1	1	1	1	1	1	1
4	BICF2G63056671	416890	2	2	2	2	2	2	2	2	2	2	2	2	2	2	2	2	2	2	2	2
4	BICF2G63056677	429405	4	4	4	4	4	4	4	4	4	4	4	4	4	4	4	4	4	4	4	4
4	CHR4_442032	442032	3	3	3	3	3	3	3	3	3	3	3	3	3	3	3	3	3	3	3	3
4	BICF2P351193	450587	2	2	2	2	2	2	2	2	2	2	2	2	2	2	2	2	2	2	2	2
4	CHR4_460893	460893	2	2	2	2	2	2	2	2	2	2	2	2	2	2	2	2	2	2	2	2
4	BICF2G63056685	473080	2	2	2	2	2	2	2	2	2	2	2	2	2	2	2	2	2	2	2	2
4	BICF2S23545041	487907	1	1	1	1	1	1	1	1	1	1	1	1	1	1	1	1	1	1	1	1
4	BICF2P999739	503789	4	4	4	4	4	4	4	4	4	4	4	4	4	4	4	4	4	4	4	4
4	TIGRP2P57083_RS9215887	513114	4	4	4	4	4	4	4	4	4	4	4	4	4	4	4	4	4	4	4	4
4	BICF2G63056698	521083	2	1	1	1	2	1	2	1	2	1	2	1	1	1	1	1	1	1	1	1
4	BICF2G63056700	537643	1	1	1	1	1	1	1	1	1	1	1	1	1	1	1	1	1	1	1	1
4	BICF2S23737084	543354	2	2	2	2	2	2	2	2	2	2	2	2	2	2	2	2	2	2	2	2
4	BICF2P1426489	556510	1	1	1	1	1	1	1	1	1	1	1	1	1	1	1	1	1	1	1	1
4	BICF2G63056714	570728	1	1	1	1	1	1	1	1	1	1	1	1	1	1	1	1	1	1	1	1
4	BICF2G63056717	582971	1	1	1	1	1	1	1	1	1	1	1	1	1	1	1	1	1	1	1	1
4	BICF2P983914	592549	1	1	1	1	1	1	1	1	1	1	1	1	1	1	1	1	1	1	1	1
4	BICF2G63056724	611457	2	2	2	2	2	2	2	2	2	2	2	2	2	2	2	2	2	2	2	2
4	TIGRP2P57095_RS8914649	622646	1	1	1	1	1	1	1	1	1	1	1	1	1	1	1	1	1	1	1	1
4	BICF2G63056729	636734	2	2	2	2	2	2	2	2	2	2	2	2	2	2	2	2	2	2	2	2
4	BICF2P253581	651550	2	2	2	2	2	2	2	2	2	2	2	2	2	2	2	2	2	2	2	2
4	BICF2S23733838	659139	3	3	3	3	3	3	3	3	3	3	3	3	3	3	3	3	3	3	3	3
4	TIGRP2P57098_RS9183411	671795	3	3	3	3	3	3	3	3	3	3	3	3	3	3	3	3	3	3	3	3
4	TIGRP2P57103_RS8938065	683986	2	2	2	2	2	2	2	2	2	2	2	2	2	2	2	2	2	2	2	2
4	BICF2G63056738	692902	2	2	2	2	2	2	2	2	2	2	2	2	2	2	2	2	2	2	2	2
4	BICF2G63056743	709237	2	2	2	2	2	2	2	2	2	2	2	2	2	2	2	2	2	2	2	2
4	BICF2G63056748	722389	1	1	1	1	1	1	1	1	1	1	1	1	1	1	1	1	1	1	1	1
4	BICF2G63056752	731587	2	2	2	2	2	2	2	2	2	2	2	2	2	2	2	2	2	2	2	2
4	BICF2P1430572	744660	2	2	2	2	2	2	2	2	2	2	2	2	2	2	2	2	2	2	2	2
4	BICF2P811601	753591	3	3	3	3	3	3	3	3	3	3	3	3	3	3	3	3	3	3	3	3
4	BICF2G63056759	753663	3	3	3	3	3	3	3	3	3	3	3	3	3	3	3	3	3	3	3	3
4	BICF2G63056761	772283	3	3	3	3	3	3	3	3	3	3	3	3	3	3	3	3	3	3	3	3
4	BICF2P501014	786322	1	1	1	1	1	1	1	1	1	1	1	1	1	1	1	1	1	1	1	1
4	BICF2P1439633	813868	4	4	4	4	4	4	4	4	4	4	4	4	4	4	4	4	4	4	4	4
4	BICF2G63056775	821750	4	4	4	4	4	4	4	4	4	4	4	4	4	4	4	4	4	4	4	4
4	BICF2G63056778	839136	2	2	2	2	2	2	2	2	2	2	2	2	2	2	2	2	2	2	2	2
4	BICF2G63056781	847348	1	1	1	1	1	1	1	1	1	1	1	1	1	1	1	1	1	1	1	1
4	BICF2G63056790	863888	3	3	3	3	3	3	3	3	3	3	3	3	3	3	3	3	3	3	3	3
4	BICF2G63056792	867752	2	2	2	2	2	2	2	2	2	2	2	2	2	2	2	2	2	2	2	2
4	BICF2S23011917	890226	4	4	4	4	4	4	4	4	4	4	4	4	4	4	4	4	4	4	4	4
4	TIGRP2P57128_RS8599067	901019	3	1	1	1	3	1	3	1	3	1	3	1	1	1	1	1	1	1	1	1
4	BICF2G63056803	920204	1	1	1	1	1	1	1	1	1	1	1	1	1	1	1	1	1	1	1	1
4	BICF2G63056804	923692	3	3	3	3	3	3	3	3	3	3	3	3	3	3	3	3	3	3	3	3
4	BICF2G63056809	935948	2	2	2	2	2	2	2	2	2	2	2	2	2	2	2	2	2	2	2	2
4	BICF2G63056812	946675	4	4	4	4	4	4	4	4	4	4	4	4	4	4	4	4	4	4	4	4
4	BICF2G63056819	976537	4	4	4	4	4	4	4	4	4	4	4	4	4	4	4	4	4	4	4	4
4	TIGRP2P57134_RS8563474	990483	3	3	3	3	3	3	3	3	3	3	3	3	3	3	3	3	3	3	3	3
4	BICF2G63056834	1011450	2	2	2	2	2	2	2	2	2	2	2	2	2	2	2	2	2	2	2	2
4	BICF2P137795	1033850	4	4	4	4	4	4	4	4	4	4	4	4	4	4	4	4	4	4	4	4
4	BICF2P561532	1060201	3	3	3	3	3	3	3	3	3	3	3	3	3	3	3	3	3	3	3	3
4	BICF2S2291224	1061112	2	2	2	2	2	2	2	2	2	2	2	2	2	2	2	2	2	2	2	2
4	BICF2G63056844	1074952	1	1	1	1	1	1	1	1	1	1	1	1	1	1	1	1	1	1	1	1
4	TIGRP2P57150_RS8394487	1091483	2	2	2	2	2	2	2	2	2	2	2	2	2	2	2	2	2	2	2	2
4	TIGRP2P57152_RS8820594	1113807	4	4	4	4	4	4	4	4	4	4	4	4	4	4	4	4	4	4	4	4
4	BICF2P888715	1122607	4	4	4	4	4	4	4	4	4	4	4	4	4	4	4	4	4	4	4	4
4	BICF2P579208	1142499	3	1	1	1	3	1	3	1	3	1	3	1	1	1	1	1	1	1	1	1
4	BICF2G63056854	1157546	1	1	1	1	1	1	1	1	1	1	1	1	1	1	1	1	1	1	1	1
4	BICF2P422562	1186421	4	4	4	4	4	4	4	4	4	4	4	4	4	4	4	4	4	4	4	4
4	BICF2P1124306	1195108	4	4	4	4	4	4	4	4	4	4	4	4	4	4	4	4	4	4	4	4
4	BICF2G63056855	1204779	3	3	3	3	3	3	3	3	3	3	3	3	3	3	3	3	3	3	3	3
4	BICF2G63056857	1210524	4	4	4	4	4	4	4	4	4	4	4	4	4	4	4	4	4	4	4	4
4	BICF2P413415	1222038	1	4	4	4	1	4	1	4	1	4	1	4	4	4	4	4	4	4	4	4
4	BICF2P815694	1247120	4	4	4	4	4	4	4	4	4	4	4	4	4	4	4	4	4	4	4	4
4	BICF2P600842	1257981	4	4	4	4	4	4	4	4	4	4	4	4	4	4	4	4	4	4	4	4
4	BICF2P818579	1269407	4	4	4	4	4	4	4	4	4	4	4	4	4	4	4	4	4	4	4	4
4	BICF2P641581	1283965	2	2	2	2	2	2	2	2	2	2	2	2	2	2	2	2	2	2	2	2
4	BICF2P445233	1303583	1	1	1	1	1	1	1	1	1	1	1	1	1	1	1	1	1	1	1	1
4	BICF2P92095	1319388	4	4	4	4	4	4	4	4	4	4	4	4	4	4	4	4	4	4	4	4
4	BICF2P296558	1335456	1	1	1	1	1	1	1	1	1	1	1	1	1	1	1	1	1	1	1	1
4	BICF2P453994	1353216	1	1	1	1	1	1	1	1	1	1	1	1	1	1	1	1	1	1	1	1
4	BICF2P1402450	1387924	2	2	2	2	2	2	2	2	2	2	2	2	2	2	2	2	2	2	2	2
4	BICF2P566703	1414819	1	1	1	1	1	1	1	1	1	1	1	1	1	1	1	1	1	1	1	1
4	BICF2P1056537	1420720	2	4	4	4	2	4	2	4	2	4	2	4	4	4	4	4	4	4	4	4
4	BICF2P1286030	1434464	1	1	1	1	1	1	1	1	1	1	1	1	1	1	1	1	1	1	1	1
4	TIGRP2P57177_RS8864373	1449825	2	2	2	2	2	2	2	2	2	2	2	2	2	2	2	2	2	2	2	2
4	BICF2S23117841	1460796	2	2	2	2	2	2	2	2	2	2	2	2	2	2	2	2	2	2	2	2
4	BICF2P1489321	1471120	1	1	1	1	1	1	1	1	1	1	1	1	1	1	1	1	1	1	1	1
4	TIGRP2P57185_RS8934400	1487172	1	1	1	1	1	1	1	1	1	1	1	1	1	1	1	1	1	1	1	1
4	BICF2G63056873	1507756	3	3	3	3	3	3	3	3	3	3	3	3	3	3	3	3	3	3	3	3
4	BICF2P1008386	1521458	2	2	2	2	2	2	2	2	2	2	2	2	2	2	2	2	2	2	2	2
4	BICF2P822399	1543323	2	2	2	2	2	2	2	2	2	2	2	2	2	2	2	2	2	2	2	2
4	BICF2P246987	1546227	2	2	2	2	2	2	2	2	2	2	2	2	2	2	2	2	2	2	2	2
4	BICF2P118702	1559652	2	2	2	2	2	2	2	2	2	2	2	2	2	2	2	2	2	2	2	2
4	BICF2P490940	1579869	3	3	3	3	3	3	3	3	3	3	3	3	3	3	3	3	3	3	3	3
4	BICF2S2308371	1595156	2	4	4	4	2	4	2	4	2	4	2	4	4	4	4	4	4	4	4	4
4	BICF2P165811	1609563	1	1	1	1	1	1	1	1	1	1	1	1	1	1	1	1	1	1	1	1
4	TIGRP2P57226_RS8992621	1617644	2	2	2	2	2	2	2	2	2	2	2	2	2	2	2	2	2	2	2	2
4	BICF2P282174	1630344	4	4	4	4	4	4	4	4	4	4	4	4	4	4	4	4	4	4	4	4
4	TIGRP2P57235_RS8882879	1636909	3	3	3	3	3	3	3	3	3	3	3	3	3	3	3	3	3	3	3	3
4	BICF2P479638	1648992	3	3	3	3	3	3	3	3	3	3	3	3	3	3	3	3	3	3	3	3
4	TIGRP2P57255_RS8823658	1659786	2	2	2	2	2	2	2	2	2	2	2	2	2	2	2	2	2	2	2	2
4	BICF2P1391243	1694772	3	3	3	3	3	3	3	3	3	3	3	3	3	3	3	3	3	3	3	3
4	BICF2G63056888	1710946	4	4	4	4	4	4	4	4	4	4	4	4	4	4	4	4	4	4	4	4
4	TIGRP2P57285_RS9056819	1748683	2	2	2	2	2	2	2	2	2	2	2	2	2	2	2	2	2	2	2	2
4	BICF2S23129784	1760418	1	3	3	3	1	3	1	3	1	3	1	3	3	3	3	3	3	3	3	3
4	CHR4_1761441	1761441	1	1	1	1	1	1	1	1	1	1	1	1	1	1	1	1	1	1	1	1
4	CHR4_1761722	1761722	3	1	1	1	3	1	3	1	3	1	3	1	1	1	1	1	1	1	1	1
4	BICF2P128217	1771366	2	2	2	2	2	2	2	2	2	2	2	2	2	2	2	2	2	2	2	2
4	BICF2P1271760	1777168	4	4	4	4	4	4	4	4	4	4	4	4	4	4	4	4	4	4	4	4
4	BICF2P1386674	1789208	1	1	1	1	1	1	1	1	1	1	1	1	1	1	1	1	1	1	1	1
4	BICF2P773310	1799404	4	4	4	4	4	4	4	4	4	4	4	4	4	4	4	4	4	4	4	4
4	TIGRP2P57301_RS8884179	1816679	4	2	2	2	4	2	4	2	4	2	4	2	2	2	2	2	2	2	2	2
4	BICF2P1005094	1826309	4	2	2	2	4	2	4	2	4	2	4	2	2	2	2	2	2	2	2	2
4	TIGRP2P57308_RS8653345	1834134	3	1	1	1	3	1	3	1	3	1	3	1	1	1	1	1	1	1	1	1
4	BICF2P920436	1847019	3	3	3	3	3	3	3	3	3	3	3	3	3	3	3	3	3	3	3	3
4	TIGRP2P57316_RS8788516	1861279	1	1	1	1	1	1	1	1	1	1	1	1	1	1	1	1	1	1	1	1
4	TIGRP2P57317_RS9022681	1868992	2	2	2	2	2	2	2	2	2	2	2	2	2	2	2	2	2	2	2	2
4	BICF2S23722553	1886676	3	3	3	3	3	3	3	3	3	3	3	3	3	3	3	3	3	3	3	3
4	BICF2P140397	1890978	4	4	4	4	4	4	4	4	4	4	4	4	4	4	4	4	4	4	4	4
4	BICF2P1160824	1904217	2	4	4	4	2	4	2	4	2	4	2	4	4	4	4	4	4	4	4	4
4	BICF2S23714561	1914735	2	2	2	2	2	2	2	2	2	2	2	2	2	2	2	2	2	2	2	2
4	BICF2S2314099	1931634	2	2	2	2	2	2	2	2	2	2	2	2	2	2	2	2	2	2	2	2
4	BICF2P881894	1935009	4	4	4	4	4	4	4	4	4	4	4	4	4	4	4	4	4	4	4	4
4	BICF2S22949017	1964160	4	2	2	2	4	2	4	2	4	2	4	2	2	2	2	2	2	2	2	2
4	BICF2S23729279	1970649	1	1	1	1	1	1	1	1	1	1	1	1	1	1	1	1	1	1	1	1
4	BICF2S23739675	1984019	3	3	3	3	3	3	3	3	3	3	3	3	3	3	3	3	3	3	3	3
4	BICF2P463138	1994461	3	4	4	4	3	4	3	4	3	4	3	4	4	4	4	4	4	4	4	4
4	BICF2P1047469	2012812	4	4	4	4	4	4	4	4	4	4	4	4	4	4	4	4	4	4	4	4
4	BICF2P887608	2018692	1	1	1	1	1	1	1	1	1	1	1	1	1	1	1	1	1	1	1	1
4	BICF2G63056901	2032010	2	2	2	2	2	2	2	2	2	2	2	2	2	2	2	2	2	2	2	2
4	TIGRP2P62759_RS9203820	2039874	3	3	3	3	3	3	3	3	3	3	3	3	3	3	3	3	3	3	3	3
4	TIGRP2P62766_RS8976213	2057181	3	3	3	3	3	3	3	3	3	3	3	3	3	3	3	3	3	3	3	3
4	BICF2P228944	2072593	3	3	3	3	3	3	3	3	3	3	3	3	3	3	3	3	3	3	3	3
4	BICF2S2354158	2075582	2	4	4	4	2	4	2	4	2	4	2	4	4	4	4	4	4	4	4	4
4	BICF2P264595	2085895	4	4	4	4	4	4	4	4	4	4	4	4	4	4	4	4	4	4	4	4
4	BICF2P288976	2106789	4	4	4	4	4	4	4	4	4	4	4	4	4	4	4	4	4	4	4	4
4	BICF2P828938	2110346	4	2	2	2	4	2	4	2	4	2	4	2	2	2	2	2	2	2	2	2
4	BICF2P579072	2126040	4	4	4	4	4	4	4	4	4	4	4	4	4	4	4	4	4	4	4	4
4	TIGRP2P62786_RS8905665	2138082	4	4	4	4	4	4	4	4	4	4	4	4	4	4	4	4	4	4	4	4
4	TIGRP2P62790_RS8648071	2150288	4	4	4	4	4	4	4	4	4	4	4	4	4	4	4	4	4	4	4	4
4	TIGRP2P62791_RS8763630	2154971	3	3	3	3	3	3	3	3	3	3	3	3	3	3	3	3	3	3	3	3
4	BICF2P702812	2173155	4	3	3	3	4	3	4	3	4	3	4	3	3	3	3	3	3	3	3	3
4	BICF2P533251	2186244	4	2	2	2	4	2	4	2	4	2	4	2	2	2	2	2	2	2	2	2
4	BICF2P1388475	2198868	3	3	3	3	3	3	3	3	3	3	3	3	3	3	3	3	3	3	3	3
4	BICF2P644898	2201379	2	2	2	2	2	2	2	2	2	2	2	2	2	2	2	2	2	2	2	2
4	BICF2P253089	2212638	3	2	2	2	3	2	3	2	3	2	3	2	2	2	2	2	2	2	2	2
4	BICF2P765971	2231763	2	2	2	2	2	2	2	2	2	2	2	2	2	2	2	2	2	2	2	2
4	TIGRP2P62810_RS8619012	2239412	1	3	3	3	1	3	1	3	1	3	1	3	3	3	3	3	3	3	3	3
4	BICF2G63056909	2247303	3	3	3	3	3	3	3	3	3	3	3	3	3	3	3	3	3	3	3	3
4	TIGRP2P62815_RS8514072	2284392	2	4	4	4	2	4	2	4	2	4	2	4	4	4	4	4	4	4	4	4
4	BICF2S23150775	2313278	4	2	2	2	4	2	4	2	4	2	4	2	2	2	2	2	2	2	2	2
4	BICF2P1144073	2325951	4	4	4	4	4	4	4	4	4	4	4	4	4	4	4	4	4	4	4	4
4	BICF2P183099	2339079	2	2	2	2	2	2	2	2	2	2	2	2	2	2	2	2	2	2	2	2
4	TIGRP2P62833_RS8857086	2358390	1	1	1	1	1	1	1	1	1	1	1	1	1	1	1	1	1	1	1	1
4	BICF2G63056912	2361688	2	2	2	2	2	2	2	2	2	2	2	2	2	2	2	2	2	2	2	2
4	CHR4_2370321	2370321	2	2	2	2	2	2	2	2	2	2	2	2	2	2	2	2	2	2	2	2
4	CHR4_2371996	2371996	3	3	3	3	3	3	3	3	3	3	3	3	3	3	3	3	3	3	3	3
4	CHR4_2372457	2372457	1	1	1	1	1	1	1	1	1	1	1	1	1	1	1	1	1	1	1	1
4	BICF2G63056915	2377011	4	4	4	4	4	4	4	4	4	4	4	4	4	4	4	4	4	4	4	4
4	CHR4_2385914	2385914	3	3	3	3	3	3	3	3	3	3	3	3	3	3	3	3	3	3	3	3
4	BICF2P448078	2390640	3	3	3	3	3	3	3	3	3	3	3	3	3	3	3	3	3	3	3	3
4	BICF2G63056917	2398265	3	3	3	3	3	3	3	3	3	3	3	3	3	3	3	3	3	3	3	3
4	CHR4_2402116	2402116	1	1	1	1	1	1	1	1	1	1	1	1	1	1	1	1	1	1	1	1
4	BICF2G63056926	2411548	3	3	3	3	3	3	3	3	3	3	3	3	3	3	3	3	3	3	3	3
4	CHR4_2425812	2425812	1	1	1	1	1	1	1	1	1	1	1	1	1	1	1	1	1	1	1	1
4	BICF2P927058	2425824	2	2	2	2	2	2	2	2	2	2	2	2	2	2	2	2	2	2	2	2
4	TIGRP2P62845_RS8818031	2432343	2	2	2	2	2	2	2	2	2	2	2	2	2	2	2	2	2	2	2	2
4	BICF2G63056961	2442049	3	3	3	3	3	3	3	3	3	3	3	3	3	3	3	3	3	3	3	3
4	CHR4_2446989	2446989	1	1	1	1	1	1	1	1	1	1	1	1	1	1	1	1	1	1	1	1
4	BICF2G63056982	2457135	1	1	1	1	1	1	1	1	1	1	1	1	1	1	1	1	1	1	1	1
4	TIGRP2P62847_RS8578619	2467442	3	3	3	3	3	3	3	3	3	3	3	3	3	3	3	3	3	3	3	3
4	BICF2G63056998	2485111	1	1	1	1	1	1	1	1	1	1	1	1	1	1	1	1	1	1	1	1
4	BICF2G63057003	2491720	1	1	1	1	1	1	1	1	1	1	1	1	1	1	1	1	1	1	1	1
4	BICF2G63057007	2499692	4	4	4	4	4	4	4	4	4	4	4	4	4	4	4	4	4	4	4	4
4	BICF2G63057033	2520014	4	4	4	4	4	4	4	4	4	4	4	4	4	4	4	4	4	4	4	4
4	BICF2G63057035	2522647	2	2	2	2	2	2	2	2	2	2	2	2	2	2	2	2	2	2	2	2
4	BICF2P1067686	2533448	4	4	4	4	4	4	4	4	4	4	4	4	4	4	4	4	4	4	4	4
4	BICF2G63057052	2544816	1	1	1	1	1	1	1	1	1	1	1	1	1	1	1	1	1	1	1	1
4	BICF2G63057061	2559001	3	3	3	3	3	3	3	3	3	3	3	3	3	3	3	3	3	3	3	3
4	BICF2G63057084	2589621	3	3	3	3	3	3	3	3	3	3	3	3	3	3	3	3	3	3	3	3
4	BICF2G63057092	2600929	1	1	1	1	1	1	1	1	1	1	1	1	1	1	1	1	1	1	1	1
4	BICF2P1247857	2602881	3	3	3	3	3	3	3	3	3	3	3	3	3	3	3	3	3	3	3	3
4	CHR4_2605250	2605250	2	2	2	2	2	2	2	2	2	2	2	2	2	2	2	2	2	2	2	2
4	BICF2G63057101	2613846	2	4	4	4	2	4	2	4	2	4	2	4	4	4	4	4	4	4	4	4
4	BICF2G63057116	2640214	3	3	3	3	3	3	3	3	3	3	3	3	3	3	3	3	3	3	3	3
4	TIGRP2P62855_RS8742912	2640595	2	2	2	2	2	2	2	2	2	2	2	2	2	2	2	2	2	2	2	2
4	TIGRP2P62858_RS8697630	2652513	3	3	3	3	3	3	3	3	3	3	3	3	3	3	3	3	3	3	3	3
4	BICF2G63057136	2667832	2	2	2	2	2	2	2	2	2	2	2	2	2	2	2	2	2	2	2	2
4	BICF2P326850	2671587	3	3	3	3	3	3	3	3	3	3	3	3	3	3	3	3	3	3	3	3
4	BICF2G63057158	2690054	2	2	2	2	2	2	2	2	2	2	2	2	2	2	2	2	2	2	2	2
4	BICF2G63057166	2695748	3	3	3	3	3	3	3	3	3	3	3	3	3	3	3	3	3	3	3	3
4	BICF2G63057186	2707273	2	2	2	2	2	2	2	2	2	2	2	2	2	2	2	2	2	2	2	2
4	BICF2G63057223	2726033	1	1	1	1	1	1	1	1	1	1	1	1	1	1	1	1	1	1	1	1
4	BICF2G63057231	2729463	3	3	3	3	3	3	3	3	3	3	3	3	3	3	3	3	3	3	3	3
4	BICF2G63057240	2741454	3	3	3	3	3	3	3	3	3	3	3	3	3	3	3	3	3	3	3	3
4	TIGRP2P62863_RS8856858	2762847	4	4	4	4	4	4	4	4	4	4	4	4	4	4	4	4	4	4	4	4
4	BICF2G63057249	2763832	2	2	2	2	2	2	2	2	2	2	2	2	2	2	2	2	2	2	2	2
4	BICF2G63057253	2779621	2	2	2	2	2	2	2	2	2	2	2	2	2	2	2	2	2	2	2	2
4	BICF2G63057255	2786688	2	2	2	2	2	2	2	2	2	2	2	2	2	2	2	2	2	2	2	2
4	BICF2P861231	2800063	1	1	1	1	1	1	1	1	1	1	1	1	1	1	1	1	1	1	1	1
4	BICF2G63057261	2815653	4	4	4	4	4	4	4	4	4	4	4	4	4	4	4	4	4	4	4	4
4	BICF2G63057267	2830612	3	3	3	3	3	3	3	3	3	3	3	3	3	3	3	3	3	3	3	3
4	BICF2G63057269	2834693	2	4	4	4	2	4	2	4	2	4	2	4	4	4	4	4	4	4	4	4
4	BICF2G63057274	2857922	4	4	4	4	4	4	4	4	4	4	4	4	4	4	4	4	4	4	4	4
4	BICF2G63057279	2881272	4	4	4	4	4	4	4	4	4	4	4	4	4	4	4	4	4	4	4	4
4	BICF2P668628	2891952	1	1	1	1	1	1	1	1	1	1	1	1	1	1	1	1	1	1	1	1
4	BICF2P330762	2907665	4	4	4	4	4	4	4	4	4	4	4	4	4	4	4	4	4	4	4	4
4	BICF2G63057291	2919679	3	3	3	3	3	3	3	3	3	3	3	3	3	3	3	3	3	3	3	3
4	BICF2G63057296	2932859	3	3	3	3	3	3	3	3	3	3	3	3	3	3	3	3	3	3	3	3
4	BICF2G63057300	2939382	4	4	4	4	4	4	4	4	4	4	4	4	4	4	4	4	4	4	4	4
4	BICF2G63057311	2948684	3	3	3	3	3	3	3	3	3	3	3	3	3	3	3	3	3	3	3	3
4	BICF2G63057322	2959103	4	4	4	4	4	4	4	4	4	4	4	4	4	4	4	4	4	4	4	4
4	BICF2G63057339	2976551	3	3	3	3	3	3	3	3	3	3	3	3	3	3	3	3	3	3	3	3
4	BICF2S22953125	2986192	2	2	2	2	2	2	2	2	2	2	2	2	2	2	2	2	2	2	2	2
4	BICF2G63057349	2994982	2	2	2	2	2	2	2	2	2	2	2	2	2	2	2	2	2	2	2	2
4	BICF2G63057355	3005385	1	1	1	1	1	1	1	1	1	1	1	1	1	1	1	1	1	1	1	1
4	BICF2P977562	3024595	2	2	2	2	2	2	2	2	2	2	2	2	2	2	2	2	2	2	2	2
4	BICF2G63057363	3034363	1	1	1	1	1	1	1	1	1	1	1	1	1	1	1	1	1	1	1	1
4	BICF2G63057370	3048691	3	3	3	3	3	3	3	3	3	3	3	3	3	3	3	3	3	3	3	3
4	BICF2G63057371	3051176	3	3	3	3	3	3	3	3	3	3	3	3	3	3	3	3	3	3	3	3
4	BICF2G63057388	3071741	1	1	1	1	1	1	1	1	1	1	1	1	1	1	1	1	1	1	1	1
4	BICF2S23653875	3082925	4	4	4	4	4	4	4	4	4	4	4	4	4	4	4	4	4	4	4	4
4	BICF2G63057404	3091206	4	4	4	4	4	4	4	4	4	4	4	4	4	4	4	4	4	4	4	4
4	BICF2G63057416	3097247	3	1	1	1	3	1	3	1	3	1	3	1	1	1	1	1	1	1	1	1
4	CHR4_3107685	3107685	1	1	1	1	1	1	1	1	1	1	1	1	1	1	1	1	1	1	1	1
4	BICF2P1144199	3123316	2	2	2	2	2	2	2	2	2	2	2	2	2	2	2	2	2	2	2	2
4	CHR4_3126439	3126439	3	3	3	3	3	3	3	3	3	3	3	3	3	3	3	3	3	3	3	3
4	CHR4_3136765	3136765	2	2	2	2	2	2	2	2	2	2	2	2	2	2	2	2	2	2	2	2
4	BICF2P123912	3146240	2	2	2	2	2	2	2	2	2	2	2	2	2	2	2	2	2	2	2	2
4	CHR4_3146777	3146777	4	4	4	4	4	4	4	4	4	4	4	4	4	4	4	4	4	4	4	4
4	TIGRP2P62894_RS8900244	3160373	1	1	1	1	1	1	1	1	1	1	1	1	1	1	1	1	1	1	1	1
4	BICF2P1242218	3172485	1	1	1	1	1	1	1	1	1	1	1	1	1	1	1	1	1	1	1	1
4	BICF2P317659	3181292	2	2	2	2	2	2	2	2	2	2	2	2	2	2	2	2	2	2	2	2
4	BICF2G63057421	3193010	3	1	1	1	3	1	3	1	3	1	3	1	1	1	1	1	1	1	1	1
4	BICF2P1237813	3212447	4	4	4	4	4	4	4	4	4	4	4	4	4	4	4	4	4	4	4	4
4	BICF2P274235	3224067	3	3	3	3	3	3	3	3	3	3	3	3	3	3	3	3	3	3	3	3
4	BICF2P989111	3246600	2	2	2	2	2	2	2	2	2	2	2	2	2	2	2	2	2	2	2	2
4	BICF2P95396	3247900	3	3	3	3	3	3	3	3	3	3	3	3	3	3	3	3	3	3	3	3
4	BICF2P245083	3259832	1	1	1	1	1	1	1	1	1	1	1	1	1	1	1	1	1	1	1	1
4	BICF2P1130572	3293805	2	2	2	2	2	2	2	2	2	2	2	2	2	2	2	2	2	2	2	2
4	BICF2P986186	3310119	1	1	1	1	1	1	1	1	1	1	1	1	1	1	1	1	1	1	1	1
4	BICF2P805558	3317355	3	3	3	3	3	3	3	3	3	3	3	3	3	3	3	3	3	3	3	3
4	BICF2P1307386	3329398	1	1	1	1	1	1	1	1	1	1	1	1	1	1	1	1	1	1	1	1
4	BICF2S23031445	3339274	3	1	1	1	3	1	3	1	3	1	3	1	1	1	1	1	1	1	1	1
4	BICF2P186482	3359725	1	1	1	1	1	1	1	1	1	1	1	1	1	1	1	1	1	1	1	1
4	BICF2G63057432	3362904	4	4	4	4	4	4	4	4	4	4	4	4	4	4	4	4	4	4	4	4
4	BICF2P1197455	3376211	1	3	3	3	1	3	1	3	1	3	1	3	3	3	3	3	3	3	3	3
4	BICF2P833847	3391634	3	4	4	4	3	4	3	4	3	4	3	4	4	4	4	4	4	4	4	4
4	BICF2S2448701	3401829	4	2	2	2	4	2	4	2	4	2	4	2	2	2	2	2	2	2	2	2
4	BICF2S22914411	3407983	3	1	1	1	3	1	3	1	3	1	3	1	1	1	1	1	1	1	1	1
4	BICF2G63057439	3426340	2	1	1	1	2	1	2	1	2	1	2	1	1	1	1	1	1	1	1	1
4	BICF2G63057440	3435563	4	4	4	4	4	4	4	4	4	4	4	4	4	4	4	4	4	4	4	4
4	CHR4_3446730	3446730	4	3	3	3	4	3	4	3	4	3	4	3	3	3	3	3	3	3	3	3
4	G265F14S171	3448411	2	2	2	2	2	2	2	2	2	2	2	2	2	2	2	2	2	2	2	2
4	BICF2P1168762	3455358	3	3	3	3	3	3	3	3	3	3	3	3	3	3	3	3	3	3	3	3
4	BICF2P375828	3475044	2	2	2	2	2	2	2	2	2	2	2	2	2	2	2	2	2	2	2	2
4	CHR4_3487059	3487059	2	2	2	2	2	2	2	2	2	2	2	2	2	2	2	2	2	2	2	2
4	BICF2P652292	3495981	4	4	4	4	4	4	4	4	4	4	4	4	4	4	4	4	4	4	4	4
4	BICF2P718603	3501112	2	2	2	2	2	2	2	2	2	2	2	2	2	2	2	2	2	2	2	2
4	CHR4_3501237	3501237	3	1	1	1	3	1	3	1	3	1	3	1	1	1	1	1	1	1	1	1
4	CHR4_3501586	3501586	1	1	1	1	1	1	1	1	1	1	1	1	1	1	1	1	1	1	1	1
4	CHR4_3502436	3502436	3	3	3	3	3	3	3	3	3	3	3	3	3	3	3	3	3	3	3	3
4	CHR4_3511719	3511719	1	1	1	1	1	1	1	1	1	1	1	1	1	1	1	1	1	1	1	1
4	BICF2S23042179	3527025	4	2	2	2	4	2	4	2	4	2	4	2	2	2	2	2	2	2	2	2
4	BICF2P86893	3544961	1	1	1	1	1	1	1	1	1	1	1	1	1	1	1	1	1	1	1	1
4	BICF2G63057449	3546758	3	3	3	3	3	3	3	3	3	3	3	3	3	3	3	3	3	3	3	3
4	CHR4_3549436	3549436	1	3	3	3	1	3	1	3	1	3	1	3	3	3	3	3	3	3	3	3
4	BICF2G63057451	3590915	2	2	2	2	2	2	2	2	2	2	2	2	2	2	2	2	2	2	2	2
4	BICF2G63057452	3592925	2	2	2	2	2	2	2	2	2	2	2	2	2	2	2	2	2	2	2	2
4	BICF2G63057455	3611455	1	1	1	1	1	1	1	1	1	1	1	1	1	1	1	1	1	1	1	1
4	BICF2G63057457	3617564	3	3	3	3	3	3	3	3	3	3	3	3	3	3	3	3	3	3	3	3
4	CHR4_3622440	3622440	3	3	3	3	3	3	3	3	3	3	3	3	3	3	3	3	3	3	3	3
4	BICF2G63057463	3633754	1	1	1	1	1	1	1	1	1	1	1	1	1	1	1	1	1	1	1	1
4	BICF2G63057464	3638103	1	1	1	1	1	1	1	1	1	1	1	1	1	1	1	1	1	1	1	1
4	BICF2G63057471	3647849	4	4	4	4	4	4	4	4	4	4	4	4	4	4	4	4	4	4	4	4
4	BICF2G63057475	3656817	1	1	1	1	1	1	1	1	1	1	1	1	1	1	1	1	1	1	1	1
4	BICF2P986953	3661553	2	2	2	2	2	2	2	2	2	2	2	2	2	2	2	2	2	2	2	2
4	BICF2P539254	3706342	3	3	3	3	3	3	3	3	3	3	3	3	3	3	3	3	3	3	3	3
4	BICF2S23651764	3716319	1	1	1	1	1	1	1	1	1	1	1	1	1	1	1	1	1	1	1	1
4	BICF2G63057485	3722656	4	3	3	3	4	3	4	3	4	3	4	3	3	3	3	3	3	3	3	3
4	BICF2S23245126	3735459	4	4	4	4	4	4	4	4	4	4	4	4	4	4	4	4	4	4	4	4
4	BICF2P687585	3759804	4	4	4	4	4	4	4	4	4	4	4	4	4	4	4	4	4	4	4	4
4	BICF2G63057489	3785508	1	4	4	4	1	4	1	4	1	4	1	4	4	4	4	4	4	4	4	4
4	BICF2G63057491	3797149	3	1	1	1	3	1	3	1	3	1	3	1	1	1	1	1	1	1	1	1
4	BICF2G63057492	3803905	2	4	4	4	2	4	2	4	2	4	2	4	4	4	4	4	4	4	4	4
4	BICF2G63057496	3820778	4	2	2	2	4	2	4	2	4	2	4	2	2	2	2	2	2	2	2	2
4	BICF2G63057498	3827779	2	4	4	4	2	4	2	4	2	4	2	4	4	4	4	4	4	4	4	4
4	BICF2G63057503	3836943	4	2	2	2	4	2	4	2	4	2	4	2	2	2	2	2	2	2	2	2
4	BICF2G63057508	3844859	4	3	3	3	4	3	4	3	4	3	4	3	3	3	3	3	3	3	3	3
4	BICF2P700303	3858074	2	1	1	1	2	1	2	1	2	1	2	1	1	1	1	1	1	1	1	1
4	BICF2G63057521	3873950	2	1	1	1	2	1	2	1	2	1	2	1	1	1	1	1	1	1	1	1
4	BICF2P956416	3900847	2	2	2	2	2	2	2	2	2	2	2	2	2	2	2	2	2	2	2	2
4	BICF2G63057526	3902583	2	2	2	2	2	2	2	2	2	2	2	2	2	2	2	2	2	2	2	2
4	BICF2P604542	3921237	1	1	1	1	1	1	1	1	1	1	1	1	1	1	1	1	1	1	1	1
4	TIGRP2P62923_RS8751869	3934053	1	1	1	1	1	1	1	1	1	1	1	1	1	1	1	1	1	1	1	1
4	BICF2P1236387	3938755	3	3	3	3	3	3	3	3	3	3	3	3	3	3	3	3	3	3	3	3
4	BICF2P1122274	3949553	4	4	4	4	4	4	4	4	4	4	4	4	4	4	4	4	4	4	4	4
4	BICF2P1252836	3958897	3	3	3	3	3	3	3	3	3	3	3	3	3	3	3	3	3	3	3	3
4	BICF2P1252834	3960440	4	4	4	4	4	4	4	4	4	4	4	4	4	4	4	4	4	4	4	4
4	CHR4_3966690	3966690	2	2	2	2	2	2	2	2	2	2	2	2	2	2	2	2	2	2	2	2
4	TIGRP2P62929_RS8997499	3972748	4	4	4	4	4	4	4	4	4	4	4	4	4	4	4	4	4	4	4	4
4	BICF2P402805	3975273	4	4	4	4	4	4	4	4	4	4	4	4	4	4	4	4	4	4	4	4
4	BICF2S23117377	3987177	2	2	2	2	2	2	2	2	2	2	2	2	2	2	2	2	2	2	2	2
4	BICF2G63057545	4001596	2	2	2	2	2	2	2	2	2	2	2	2	2	2	2	2	2	2	2	2
4	BICF2G63057546	4002641	2	2	2	2	2	2	2	2	2	2	2	2	2	2	2	2	2	2	2	2
4	BICF2G63057549	4010073	2	2	2	2	2	2	2	2	2	2	2	2	2	2	2	2	2	2	2	2
4	BICF2P1387263	4017204	4	4	4	4	4	4	4	4	4	4	4	4	4	4	4	4	4	4	4	4
4	BICF2G63057553	4029926	3	3	3	3	3	3	3	3	3	3	3	3	3	3	3	3	3	3	3	3
4	BICF2P81297	4045791	2	2	2	2	2	2	2	2	2	2	2	2	2	2	2	2	2	2	2	2
4	BICF2G63057554	4062848	3	3	3	3	3	3	3	3	3	3	3	3	3	3	3	3	3	3	3	3
4	BICF2G63057555	4063337	3	3	3	3	3	3	3	3	3	3	3	3	3	3	3	3	3	3	3	3
4	BICF2G63057561	4077100	3	3	3	3	3	3	3	3	3	3	3	3	3	3	3	3	3	3	3	3
4	BICF2P801478	4092922	3	3	3	3	3	3	3	3	3	3	3	3	3	3	3	3	3	3	3	3
4	BICF2P576390	4120173	1	1	1	1	1	1	1	1	1	1	1	1	1	1	1	1	1	1	1	1
4	TIGRP2P62959_RS9095786	4128883	3	3	3	3	3	3	3	3	3	3	3	3	3	3	3	3	3	3	3	3
4	BICF2P1426679	4132853	1	1	1	1	1	1	1	1	1	1	1	1	1	1	1	1	1	1	1	1
4	BICF2G63057568	4145054	3	4	4	4	3	4	3	4	3	4	3	4	4	4	4	4	4	4	4	4
4	BICF2P1033333	4166489	3	1	1	1	3	1	3	1	3	1	3	1	1	1	1	1	1	1	1	1
4	CHR4_4191875	4191875	1	1	1	1	1	1	1	1	1	1	1	1	1	1	1	1	1	1	1	1
4	BICF2P341667	4200961	1	3	3	3	1	3	1	3	1	3	1	3	3	3	3	3	3	3	3	3
4	BICF2P49741	4217091	2	2	2	2	2	2	2	2	2	2	2	2	2	2	2	2	2	2	2	2
4	BICF2G63057589	4229125	2	2	2	2	2	2	2	2	2	2	2	2	2	2	2	2	2	2	2	2
4	BICF2P410115	4243468	3	3	3	3	3	3	3	3	3	3	3	3	3	3	3	3	3	3	3	3
4	TIGRP2P62968_RS8544255	4249083	3	3	3	3	3	3	3	3	3	3	3	3	3	3	3	3	3	3	3	3
4	BICF2G63057605	4273840	1	1	1	1	1	1	1	1	1	1	1	1	1	1	1	1	1	1	1	1
4	TIGRP2P62972_RS8690436	4281588	1	1	1	1	1	1	1	1	1	1	1	1	1	1	1	1	1	1	1	1
4	TIGRP2P62975_RS9178950	4293994	4	4	4	4	4	4	4	4	4	4	4	4	4	4	4	4	4	4	4	4
4	TIGRP2P62977_RS8596233	4308043	0	0	0	0	0	0	0	0	0	0	0	0	0	0	0	0	0	0	0	0
4	BICF2P233401	4312269	2	2	2	2	2	2	2	2	2	2	2	2	2	2	2	2	2	2	2	2
4	TIGRP2P62983_RS8612808	4316366	3	1	1	1	3	1	3	1	3	1	3	1	1	1	1	1	1	1	1	1
4	BICF2P1031353	4328792	2	4	4	4	2	4	2	4	2	4	2	4	4	4	4	4	4	4	4	4
4	TIGRP2P62996_RS9077115	4340576	4	2	2	2	4	2	4	2	4	2	4	2	2	2	2	2	2	2	2	2
4	TIGRP2P63007_RS8493508	4353724	3	3	3	3	3	3	3	3	3	3	3	3	3	3	3	3	3	3	3	3
4	BICF2P21473	4356939	2	2	2	2	2	2	2	2	2	2	2	2	2	2	2	2	2	2	2	2
4	BICF2P434574	4368490	4	4	4	4	4	4	4	4	4	4	4	4	4	4	4	4	4	4	4	4
4	BICF2P683275	4378998	2	4	4	4	2	4	2	4	2	4	2	4	4	4	4	4	4	4	4	4
4	BICF2G63057614	4385698	3	1	1	1	3	1	3	1	3	1	3	1	1	1	1	1	1	1	1	1
4	BICF2P1220457	4388370	4	3	3	3	4	3	4	3	4	3	4	3	3	3	3	3	3	3	3	3
4	BICF2P1220456	4388572	4	4	4	4	4	4	4	4	4	4	4	4	4	4	4	4	4	4	4	4
4	BICF2P1220455	4388687	3	3	3	3	3	3	3	3	3	3	3	3	3	3	3	3	3	3	3	3
4	BICF2S23411611	4407528	1	2	2	2	1	2	1	2	1	2	1	2	2	2	2	2	2	2	2	2
4	BICF2P1134119	4409407	2	2	2	2	2	2	2	2	2	2	2	2	2	2	2	2	2	2	2	2
4	TIGRP2P63027_RS8957911	4422516	3	3	3	3	3	3	3	3	3	3	3	3	3	3	3	3	3	3	3	3
4	BICF2P70307	4431973	1	1	1	1	1	1	1	1	1	1	1	1	1	1	1	1	1	1	1	1
4	BICF2P1176684	4466260	3	1	1	1	3	1	3	1	3	1	3	1	1	1	1	1	1	1	1	1
4	CHR4_4483553	4483553	4	4	4	4	4	4	4	4	4	4	4	4	4	4	4	4	4	4	4	4
4	BICF2P1298828	4486139	1	3	3	3	1	3	1	3	1	3	1	3	3	3	3	3	3	3	3	3
4	BICF2P935399	4488669	4	2	2	2	4	2	4	2	4	2	4	2	2	2	2	2	2	2	2	2
4	BICF2G63057626	4497053	2	2	2	2	2	2	2	2	2	2	2	2	2	2	2	2	2	2	2	2
4	BICF2P57492	4500685	3	1	1	1	3	1	3	1	3	1	3	1	1	1	1	1	1	1	1	1
4	BICF2S22920122	4501113	2	4	4	4	2	4	2	4	2	4	2	4	4	4	4	4	4	4	4	4
4	BICF2P217906	4520531	1	3	3	3	1	3	1	3	1	3	1	3	3	3	3	3	3	3	3	3
4	BICF2P1410435	4524056	2	1	1	1	2	1	2	1	2	1	2	1	1	1	1	1	1	1	1	1
4	BICF2P630630	4528034	3	1	1	1	3	1	3	1	3	1	3	1	1	1	1	1	1	1	1	1
4	TIGRP2P63061_RS8966354	4556000	3	3	3	3	3	3	3	3	3	3	3	3	3	3	3	3	3	3	3	3
4	BICF2P1431993	4558129	1	3	3	3	1	3	1	3	1	3	1	3	3	3	3	3	3	3	3	3
4	BICF2P334706	4577094	3	4	4	4	3	4	3	4	3	4	3	4	4	4	4	4	4	4	4	4
4	TIGRP2P63066_RS8793692	4584003	3	3	3	3	3	3	3	3	3	3	3	3	3	3	3	3	3	3	3	3
4	BICF2P1233903	4596185	1	3	3	3	1	3	1	3	1	3	1	3	3	3	3	3	3	3	3	3
4	BICF2P1233899	4597065	4	3	3	3	4	3	4	3	4	3	4	3	3	3	3	3	3	3	3	3
4	BICF2P659095	4607455	4	2	2	2	4	2	4	2	4	2	4	2	2	2	2	2	2	2	2	2
4	BICF2P573567	4636573	2	2	2	2	2	2	2	2	2	2	2	2	2	2	2	2	2	2	2	2
4	BICF2P707004	4648882	3	3	3	3	3	3	3	3	3	3	3	3	3	3	3	3	3	3	3	3
4	BICF2G63057631	4651769	3	3	3	3	3	3	3	3	3	3	3	3	3	3	3	3	3	3	3	3
4	BICF2G63057633	4665415	1	3	3	3	1	3	1	3	1	3	1	3	3	3	3	3	3	3	3	3
4	BICF2S23011204	4677933	3	1	1	1	3	1	3	1	3	1	3	1	1	1	1	1	1	1	1	1
4	BICF2P260050	4693760	2	4	4	4	2	4	2	4	2	4	2	4	4	4	4	4	4	4	4	4
4	BICF2P1152940	4699585	4	4	4	4	4	4	4	4	4	4	4	4	4	4	4	4	4	4	4	4
4	BICF2P1370034	4713642	3	1	1	1	3	1	3	1	3	1	3	1	1	1	1	1	1	1	1	1
4	BICF2P38235	4730173	2	2	2	2	2	2	2	2	2	2	2	2	2	2	2	2	2	2	2	2
4	BICF2P293789	4737553	1	3	3	3	1	3	1	3	1	3	1	3	3	3	3	3	3	3	3	3
4	CHR4_4750711	4750711	2	4	4	4	2	4	2	4	2	4	2	4	4	4	4	4	4	4	4	4
4	BICF2P889556	4751412	1	1	1	1	1	1	1	1	1	1	1	1	1	1	1	1	1	1	1	1
4	BICF2P889555	4752277	3	1	1	1	3	1	3	1	3	1	3	1	1	1	1	1	1	1	1	1
4	BICF2P222374	4780975	3	4	4	4	3	4	3	4	3	4	3	4	4	4	4	4	4	4	4	4
4	BICF2G63057646	4795833	2	2	2	2	2	2	2	2	2	2	2	2	2	2	2	2	2	2	2	2
4	BICF2G63057649	4814299	3	1	1	1	3	1	3	1	3	1	3	1	1	1	1	1	1	1	1	1
4	BICF2P270624	4832387	1	3	3	3	1	3	1	3	1	3	1	3	3	3	3	3	3	3	3	3
4	BICF2G63057663	4837820	2	4	4	4	2	4	2	4	2	4	2	4	4	4	4	4	4	4	4	4
4	BICF2G63057670	4846463	2	4	4	4	2	4	2	4	2	4	2	4	4	4	4	4	4	4	4	4
4	BICF2G63057671	4859646	2	4	4	4	2	4	2	4	2	4	2	4	4	4	4	4	4	4	4	4
4	TIGRP2P63093_RS8881697	4879712	3	3	3	3	3	3	3	3	3	3	3	3	3	3	3	3	3	3	3	3
4	BICF2G63057680	4885375	3	1	1	1	3	1	3	1	3	1	3	1	1	1	1	1	1	1	1	1
4	BICF2G63057681	4893291	4	4	4	4	4	4	4	4	4	4	4	4	4	4	4	4	4	4	4	4
4	BICF2G63057688	4925592	3	3	3	3	3	3	3	3	3	3	3	3	3	3	3	3	3	3	3	3
4	BICF2P1092567	4927563	3	1	1	1	3	1	3	1	3	1	3	1	1	1	1	1	1	1	1	1
4	BICF2G63057691	4937924	1	3	3	3	1	3	1	3	1	3	1	3	3	3	3	3	3	3	3	3
4	BICF2G63057694	4968861	3	1	1	1	3	1	3	1	3	1	3	1	1	1	1	1	1	1	1	1
4	BICF2G63057695	4979245	2	1	1	1	2	1	2	1	2	1	2	1	1	1	1	1	1	1	1	1
4	BICF2P1347658	4990156	4	2	2	2	4	2	4	2	4	2	4	2	2	2	2	2	2	2	2	2
4	BICF2G63057732	4996621	3	1	1	1	3	1	3	1	3	1	3	1	1	1	1	1	1	1	1	1
4	BICF2G63057752	5007624	2	4	4	4	2	4	2	4	2	4	2	4	4	4	4	4	4	4	4	4
4	BICF2G63057755	5017495	2	4	4	4	2	4	2	4	2	4	2	4	4	4	4	4	4	4	4	4
4	BICF2P438995	5018867	2	2	2	2	2	2	2	2	2	2	2	2	2	2	2	2	2	2	2	2
4	BICF2G63057765	5043294	3	3	3	3	3	3	3	3	3	3	3	3	3	3	3	3	3	3	3	3
4	BICF2G63057766	5061100	3	1	1	1	3	1	3	1	3	1	3	1	1	1	1	1	1	1	1	1
4	TIGRP2P63100_RS8953761	5069127	3	3	3	3	3	3	3	3	3	3	3	3	3	3	3	3	3	3	3	3
4	BICF2P495653	5077843	4	4	4	4	4	4	4	4	4	4	4	4	4	4	4	4	4	4	4	4
4	BICF2P1120579	5091655	4	4	4	4	4	4	4	4	4	4	4	4	4	4	4	4	4	4	4	4
4	BICF2P366255	5093783	1	1	1	1	1	1	1	1	1	1	1	1	1	1	1	1	1	1	1	1
4	BICF2P321488	5108773	3	3	3	3	3	3	3	3	3	3	3	3	3	3	3	3	3	3	3	3
4	BICF2P1318478	5111452	3	3	3	3	3	3	3	3	3	3	3	3	3	3	3	3	3	3	3	3
4	BICF2P786276	5140863	3	3	3	3	3	3	3	3	3	3	3	3	3	3	3	3	3	3	3	3
4	BICF2P579549	5147615	1	1	1	1	1	1	1	1	1	1	1	1	1	1	1	1	1	1	1	1
4	TIGRP2P63131_RS8969133	5156151	4	2	2	2	4	2	4	2	4	2	4	2	2	2	2	2	2	2	2	2
4	BICF2P1032763	5167769	3	3	3	3	3	3	3	3	3	3	3	3	3	3	3	3	3	3	3	3
4	BICF2G63057771	5180966	2	4	4	4	2	4	2	4	2	4	2	4	4	4	4	4	4	4	4	4
4	BICF2P1331914	5200932	3	3	3	3	3	3	3	3	3	3	3	3	3	3	3	3	3	3	3	3
4	BICF2G63057773	5222652	1	1	1	1	1	1	1	1	1	1	1	1	1	1	1	1	1	1	1	1
4	BICF2P616722	5233458	1	3	3	3	1	3	1	3	1	3	1	3	3	3	3	3	3	3	3	3
4	BICF2P1394753	5242556	3	1	1	1	3	1	3	1	3	1	3	1	1	1	1	1	1	1	1	1
4	CHR4_5246927	5246927	1	3	3	3	1	3	1	3	1	3	1	3	3	3	3	3	3	3	3	3
4	BICF2G63057775	5253737	3	1	1	1	3	1	3	1	3	1	3	1	1	1	1	1	1	1	1	1
4	BICF2G63057780	5261059	2	2	2	2	2	2	2	2	2	2	2	2	2	2	2	2	2	2	2	2
4	BICF2G63057784	5273561	4	4	4	4	4	4	4	4	4	4	4	4	4	4	4	4	4	4	4	4
4	BICF2G63057801	5280675	3	3	3	3	3	3	3	3	3	3	3	3	3	3	3	3	3	3	3	3
4	TIGRP2P63151_RS8790675	5283410	3	3	3	3	3	3	3	3	3	3	3	3	3	3	3	3	3	3	3	3
4	BICF2S23142183	5297375	3	3	3	3	3	3	3	3	3	3	3	3	3	3	3	3	3	3	3	3
4	BICF2G63057847	5319045	2	3	3	3	2	3	2	3	2	3	2	3	3	3	3	3	3	3	3	3
4	BICF2G63057849	5328509	2	4	4	4	2	4	2	4	2	4	2	4	4	4	4	4	4	4	4	4
4	BICF2P1157581	5342096	1	1	1	1	1	1	1	1	1	1	1	1	1	1	1	1	1	1	1	1
4	BICF2G63057864	5360423	2	4	4	4	2	4	2	4	2	4	2	4	4	4	4	4	4	4	4	4
4	BICF2G63057880	5365601	1	2	2	2	1	2	1	2	1	2	1	2	2	2	2	2	2	2	2	2
4	BICF2G63057902	5377326	3	3	3	3	3	3	3	3	3	3	3	3	3	3	3	3	3	3	3	3
4	BICF2G63057934	5387557	2	2	2	2	2	2	2	2	2	2	2	2	2	2	2	2	2	2	2	2
4	BICF2G63057960	5398206	3	3	3	3	3	3	3	3	3	3	3	3	3	3	3	3	3	3	3	3
4	BICF2G63057979	5416891	3	3	3	3	3	3	3	3	3	3	3	3	3	3	3	3	3	3	3	3
4	BICF2G63057989	5420592	3	3	3	3	3	3	3	3	3	3	3	3	3	3	3	3	3	3	3	3
4	BICF2G63058019	5436029	3	2	2	2	3	2	3	2	3	2	3	2	2	2	2	2	2	2	2	2
4	BICF2G63058055	5451524	1	3	3	3	1	3	1	3	1	3	1	3	3	3	3	3	3	3	3	3
4	BICF2G63058057	5457097	4	3	3	3	4	3	4	3	4	3	4	3	3	3	3	3	3	3	3	3
4	BICF2P1343014	5495264	1	1	1	1	1	1	1	1	1	1	1	1	1	1	1	1	1	1	1	1
4	BICF2G63058073	5501098	2	4	4	4	2	4	2	4	2	4	2	4	4	4	4	4	4	4	4	4
4	BICF2G63058100	5522032	2	3	3	3	2	3	2	3	2	3	2	3	3	3	3	3	3	3	3	3
4	BICF2G63058106	5524224	1	3	3	3	1	3	1	3	1	3	1	3	3	3	3	3	3	3	3	3
4	CHR4_5526060	5526060	4	2	2	2	4	2	4	2	4	2	4	2	2	2	2	2	2	2	2	2
4	CHR4_5526721	5526721	2	2	2	2	2	2	2	2	2	2	2	2	2	2	2	2	2	2	2	2
4	BICF2P494346	5527132	2	4	4	4	2	4	2	4	2	4	2	4	4	4	4	4	4	4	4	4
4	BICF2G63058109	5527759	2	4	4	4	2	4	2	4	2	4	2	4	4	4	4	4	4	4	4	4
4	CHR4_5529172	5529172	1	1	1	1	1	1	1	1	1	1	1	1	1	1	1	1	1	1	1	1
4	CHR4_5529424	5529424	2	2	2	2	2	2	2	2	2	2	2	2	2	2	2	2	2	2	2	2
4	BICF2G63058132	5535523	2	2	2	2	2	2	2	2	2	2	2	2	2	2	2	2	2	2	2	2
4	BICF2P602090	5555697	2	4	4	4	2	4	2	4	2	4	2	4	4	4	4	4	4	4	4	4
4	BICF2G63058175	5559983	3	3	3	3	3	3	3	3	3	3	3	3	3	3	3	3	3	3	3	3
4	BICF2G63058200	5570075	2	4	4	4	2	4	2	4	2	4	2	4	4	4	4	4	4	4	4	4
4	BICF2G63058216	5584894	4	2	2	2	4	2	4	2	4	2	4	2	2	2	2	2	2	2	2	2
4	BICF2G63058220	5593888	3	3	3	3	3	3	3	3	3	3	3	3	3	3	3	3	3	3	3	3
4	BICF2P776885	5611099	2	2	2	2	2	2	2	2	2	2	2	2	2	2	2	2	2	2	2	2
4	BICF2S23514038	5622432	3	1	1	1	3	1	3	1	3	1	3	1	1	1	1	1	1	1	1	1
4	BICF2G63058252	5629537	2	2	2	2	2	2	2	2	2	2	2	2	2	2	2	2	2	2	2	2
4	BICF2G63058256	5632403	3	3	3	3	3	3	3	3	3	3	3	3	3	3	3	3	3	3	3	3
4	CHR4_5633324	5633324	3	3	3	3	3	3	3	3	3	3	3	3	3	3	3	3	3	3	3	3
4	BICF2G63058266	5650071	3	4	4	4	3	4	3	4	3	4	3	4	4	4	4	4	4	4	4	4
4	BICF2S23442131	5661105	1	1	1	1	1	1	1	1	1	1	1	1	1	1	1	1	1	1	1	1
4	BICF2S23148877	5667139	2	1	1	1	2	1	2	1	2	1	2	1	1	1	1	1	1	1	1	1
4	BICF2S230147	5673402	3	3	3	3	3	3	3	3	3	3	3	3	3	3	3	3	3	3	3	3
4	BICF2P1339659	5691762	1	1	1	1	1	1	1	1	1	1	1	1	1	1	1	1	1	1	1	1
4	BICF2P739169	5696451	1	1	1	1	1	1	1	1	1	1	1	1	1	1	1	1	1	1	1	1
4	BICF2S22947995	5711720	4	4	4	4	4	4	4	4	4	4	4	4	4	4	4	4	4	4	4	4
4	BICF2P350900	5723051	1	1	1	1	1	1	1	1	1	1	1	1	1	1	1	1	1	1	1	1
4	BICF2G63058303	5731102	3	2	2	2	3	2	3	2	3	2	3	2	2	2	2	2	2	2	2	2
4	BICF2G63058306	5742459	2	4	4	4	2	4	2	4	2	4	2	4	4	4	4	4	4	4	4	4
4	BICF2G63058318	5757049	4	2	2	2	4	2	4	2	4	2	4	2	2	2	2	2	2	2	2	2
4	BICF2G63058328	5760627	2	4	4	4	2	4	2	4	2	4	2	4	4	4	4	4	4	4	4	4
4	BICF2G63058337	5765430	3	1	1	1	3	1	3	1	3	1	3	1	1	1	1	1	1	1	1	1
4	BICF2G63058342	5777343	1	1	1	1	1	1	1	1	1	1	1	1	1	1	1	1	1	1	1	1
4	BICF2G63058368	5793700	2	2	2	2	2	2	2	2	2	2	2	2	2	2	2	2	2	2	2	2
4	BICF2G63058375	5805038	1	1	1	1	1	1	1	1	1	1	1	1	1	1	1	1	1	1	1	1
4	BICF2G63058386	5812740	2	2	0	0	2	2	2	2	2	2	2	2	0	0	0	0	0	0	0	0
4	BICF2G63058396	5820585	3	3	3	3	3	3	3	3	3	3	3	3	3	3	3	3	3	3	3	3
4	BICF2G63058404	5822858	1	1	1	1	1	1	1	1	1	1	1	1	1	1	1	1	1	1	1	1
4	BICF2P1193126	5840941	1	1	1	1	1	1	1	1	1	1	1	1	1	1	1	1	1	1	1	1
4	BICF2P931447	5857253	1	1	1	1	1	1	1	1	1	1	1	1	1	1	1	1	1	1	1	1
4	BICF2P917587	5874009	3	1	1	1	3	1	3	1	3	1	3	1	1	1	1	1	1	1	1	1
4	BICF2P1142729	5885380	1	1	1	1	1	1	1	1	1	1	1	1	1	1	1	1	1	1	1	1
4	BICF2G63058441	5926911	1	1	1	1	1	1	1	1	1	1	1	1	1	1	1	1	1	1	1	1
4	BICF2G63058444	5940671	3	3	3	3	3	3	3	3	3	3	3	3	3	3	3	3	3	3	3	3
4	BICF2P888993	5954086	1	1	1	1	1	1	1	1	1	1	1	1	1	1	1	1	1	1	1	1
4	TIGRP2P63206_RS8832465	5965393	2	4	4	4	2	4	2	4	2	4	2	4	4	4	4	4	4	4	4	4
4	TIGRP2P63209_RS9172008	5974769	1	3	3	3	1	3	1	3	1	3	1	3	3	3	3	3	3	3	3	3
4	BICF2S23416313	5983287	1	3	3	3	1	3	1	3	1	3	1	3	3	3	3	3	3	3	3	3
4	BICF2G63058471	5985413	1	1	1	1	1	1	1	1	1	1	1	1	1	1	1	1	1	1	1	1
4	BICF2G63058501	5996275	4	4	4	4	4	4	4	4	4	4	4	4	4	4	4	4	4	4	4	4
4	TIGRP2P63224_RS8725241	6015491	4	4	4	4	4	4	4	4	4	4	4	4	4	4	4	4	4	4	4	4
4	BICF2G63058506	6019604	4	4	4	4	4	4	4	4	4	4	4	4	4	4	4	4	4	4	4	4
4	BICF2G63058535	6031424	1	1	1	1	1	1	1	1	1	1	1	1	1	1	1	1	1	1	1	1
4	BICF2G63058539	6048987	3	3	3	3	3	3	3	3	3	3	3	3	3	3	3	3	3	3	3	3
4	BICF2G63058564	6061935	1	1	1	1	1	1	1	1	1	1	1	1	1	1	1	1	1	1	1	1
4	BICF2G63058567	6064712	4	4	4	4	4	4	4	4	4	4	4	4	4	4	4	4	4	4	4	4
4	BICF2G63058599	6080100	4	4	4	4	4	4	4	4	4	4	4	4	4	4	4	4	4	4	4	4
4	BICF2G63058610	6085407	0	0	0	0	0	0	0	0	0	0	0	0	0	0	0	0	0	0	0	0
4	BICF2G63058619	6088143	4	4	4	4	4	4	4	4	4	4	4	4	4	4	4	4	4	4	4	4
4	BICF2P1065802	6105260	1	1	1	1	1	1	1	1	1	1	1	1	1	1	1	1	1	1	1	1
4	BICF2G63058645	6113711	2	2	2	2	2	2	2	2	2	2	2	2	2	2	2	2	2	2	2	2
4	CHR4_6122009	6122009	3	3	3	3	3	3	3	3	3	3	3	3	3	3	3	3	3	3	3	3
4	BICF2G63058646	6122865	1	1	1	1	1	1	1	1	1	1	1	1	1	1	1	1	1	1	1	1
4	BICF2G63058680	6138392	2	2	2	2	2	2	2	2	2	2	2	2	2	2	2	2	2	2	2	2
4	BICF2S23211040	6145742	1	1	1	1	1	1	1	1	1	1	1	1	1	1	1	1	1	1	1	1
4	BICF2G63058695	6150063	3	3	3	3	3	3	3	3	3	3	3	3	3	3	3	3	3	3	3	3
4	BICF2P45154	6154430	1	3	3	3	1	3	1	3	1	3	1	3	3	3	3	3	3	3	3	3
4	BICF2S23647741	6157250	2	2	2	2	2	2	2	2	2	2	2	2	2	2	2	2	2	2	2	2
4	BICF2P209158	6172451	3	3	3	3	3	3	3	3	3	3	3	3	3	3	3	3	3	3	3	3
4	BICF2S23253064	6185511	1	1	1	1	1	1	1	1	1	1	1	1	1	1	1	1	1	1	1	1
4	TIGRP2P63242_RS8665303	6199008	3	3	3	3	3	3	3	3	3	3	3	3	3	3	3	3	3	3	3	3
4	BICF2G63058739	6204210	3	3	3	3	3	3	3	3	3	3	3	3	3	3	3	3	3	3	3	3
4	BICF2G63058754	6214970	2	4	4	4	2	4	2	4	2	4	2	4	4	4	4	4	4	4	4	4
4	BICF2G63058775	6226377	4	4	4	4	4	4	4	4	4	4	4	4	4	4	4	4	4	4	4	4
4	BICF2G63058789	6240130	3	3	3	3	3	3	3	3	3	3	3	3	3	3	3	3	3	3	3	3
4	BICF2G63058791	6244252	3	3	3	3	3	3	3	3	3	3	3	3	3	3	3	3	3	3	3	3
4	BICF2G63058816	6257817	2	2	2	2	2	2	2	2	2	2	2	2	2	2	2	2	2	2	2	2
4	BICF2G63058826	6260588	2	2	2	2	2	2	2	2	2	2	2	2	2	2	2	2	2	2	2	2
4	BICF2S23155827	6271291	1	1	1	1	1	1	1	1	1	1	1	1	1	1	1	1	1	1	1	1
4	BICF2G63058892	6303579	4	4	4	4	4	4	4	4	4	4	4	4	4	4	4	4	4	4	4	4
4	BICF2G63058908	6309627	3	3	3	3	3	3	3	3	3	3	3	3	3	3	3	3	3	3	3	3
4	BICF2S2319703	6323708	3	3	3	3	3	3	3	3	3	3	3	3	3	3	3	3	3	3	3	3
4	CHR4_6339121	6339121	3	3	3	3	3	3	3	3	3	3	3	3	3	3	3	3	3	3	3	3
4	BICF2G63058940	6339254	1	1	1	1	1	1	1	1	1	1	1	1	1	1	1	1	1	1	1	1
4	CHR4_6339305	6339305	4	4	4	4	4	4	4	4	4	4	4	4	4	4	4	4	4	4	4	4
4	BICF2G63058941	6340358	3	3	3	3	3	3	3	3	3	3	3	3	3	3	3	3	3	3	3	3
4	CHR4_6340481	6340481	4	4	4	4	4	4	4	4	4	4	4	4	4	4	4	4	4	4	4	4
4	BICF2G63058942	6340610	1	1	1	1	1	1	1	1	1	1	1	1	1	1	1	1	1	1	1	1
4	BICF2G63058944	6342209	4	4	4	4	4	4	4	4	4	4	4	4	4	4	4	4	4	4	4	4
4	CHR4_6343536	6343536	3	3	3	3	3	3	3	3	3	3	3	3	3	3	3	3	3	3	3	3
4	BICF2G63058950	6343675	4	4	4	4	4	4	4	4	4	4	4	4	4	4	4	4	4	4	4	4
4	BICF2G63058957	6356790	3	3	4	4	3	3	3	3	3	3	3	3	4	4	4	4	4	4	4	4
4	BICF2G63058969	6374197	4	4	4	4	4	4	4	4	4	4	4	4	4	4	4	4	4	4	4	4
4	BICF2G63058973	6374837	3	3	3	3	3	3	3	3	3	3	3	3	3	3	3	3	3	3	3	3
4	BICF2G63058984	6388631	1	1	1	1	1	1	1	1	1	1	1	1	1	1	1	1	1	1	1	1
4	BICF2G63059003	6398120	1	1	1	1	1	1	1	1	1	1	1	1	1	1	1	1	1	1	1	1
4	BICF2G63059021	6418588	1	1	1	1	1	1	1	1	1	1	1	1	1	1	1	1	1	1	1	1
4	BICF2G63059026	6435515	2	2	2	2	2	2	2	2	2	2	2	2	2	2	2	2	2	2	2	2
4	BICF2G63059028	6445343	4	4	4	4	4	4	4	4	4	4	4	4	4	4	4	4	4	4	4	4
4	BICF2G63059033	6452818	4	4	4	4	4	4	4	4	4	4	4	4	4	4	4	4	4	4	4	4
4	BICF2G63059034	6453762	2	2	2	2	2	2	2	2	2	2	2	2	2	2	2	2	2	2	2	2
4	BICF2G63059038	6461849	2	2	2	2	2	2	2	2	2	2	2	2	2	2	2	2	2	2	2	2
4	BICF2G63059041	6466383	2	2	2	2	2	2	2	2	2	2	2	2	2	2	2	2	2	2	2	2
4	BICF2G63059048	6477791	2	2	2	2	2	2	2	2	2	2	2	2	2	2	2	2	2	2	2	2
4	BICF2G63059070	6490744	1	3	3	3	1	3	1	3	1	3	1	3	3	3	3	3	3	3	3	3
4	CHR4_6496664	6496664	3	3	3	3	3	3	3	3	3	3	3	3	3	3	3	3	3	3	3	3
4	BICF2G63059082	6500713	3	3	3	3	3	3	3	3	3	3	3	3	3	3	3	3	3	3	3	3
4	BICF2G63059102	6505210	3	3	3	3	3	3	3	3	3	3	3	3	3	3	3	3	3	3	3	3
4	BICF2G63059125	6510960	4	4	4	4	4	4	4	4	4	4	4	4	4	4	4	4	4	4	4	4
4	BICF2P445398	6531690	4	4	4	4	4	4	4	4	4	4	4	4	4	4	4	4	4	4	4	4
4	CHR4_6543234	6543234	4	4	4	4	4	4	4	4	4	4	4	4	4	4	4	4	4	4	4	4
4	BICF2G63059130	6543816	2	2	2	2	2	2	2	2	2	2	2	2	2	2	2	2	2	2	2	2
4	BICF2G63059131	6544358	4	4	4	4	4	4	4	4	4	4	4	4	4	4	4	4	4	4	4	4
4	BICF2G63059133	6555796	3	3	3	3	3	3	3	3	3	3	3	3	3	3	3	3	3	3	3	3
4	BICF2S23554929	6581996	1	1	1	1	1	1	1	1	1	1	1	1	1	1	1	1	1	1	1	1
4	BICF2G63059164	6593755	3	3	3	3	3	3	3	3	3	3	3	3	3	3	3	3	3	3	3	3
4	BICF2G63059188	6601755	1	1	1	1	1	1	1	1	1	1	1	1	1	1	1	1	1	1	1	1
4	BICF2G63059202	6613592	3	3	3	3	3	3	3	3	3	3	3	3	3	3	3	3	3	3	3	3
4	BICF2G63059213	6624873	2	2	2	2	2	2	2	2	2	2	2	2	2	2	2	2	2	2	2	2
4	BICF2S23439930	6642773	4	4	4	4	4	4	4	4	4	4	4	4	4	4	4	4	4	4	4	4
4	BICF2G63059243	6649548	3	3	3	3	3	3	3	3	3	3	3	3	3	3	3	3	3	3	3	3
4	BICF2G63059244	6659645	4	4	4	4	4	4	4	4	4	4	4	4	4	4	4	4	4	4	4	4
4	BICF2G63059247	6674552	2	2	2	2	2	2	2	2	2	2	2	2	2	2	2	2	2	2	2	2
4	BICF2G63059256	6682486	3	1	1	1	3	1	3	1	3	1	3	1	1	1	1	1	1	1	1	1
4	CHR4_6691752	6691752	2	2	2	2	2	2	2	2	2	2	2	2	2	2	2	2	2	2	2	2
4	CHR4_6697659	6697659	3	3	3	3	3	3	3	3	3	3	3	3	3	3	3	3	3	3	3	3
4	CHR4_6698051	6698051	2	1	1	1	2	1	2	1	2	1	2	1	1	1	1	1	1	1	1	1
4	BICF2S23623842	6698820	1	2	2	2	1	2	1	2	1	2	1	2	2	2	2	2	2	2	2	2
4	BICF2G63059300	6716747	3	3	3	3	3	3	3	3	3	3	3	3	3	3	3	3	3	3	3	3
4	BICF2P244423	6723377	1	1	1	1	1	1	1	1	1	1	1	1	1	1	1	1	1	1	1	1
4	BICF2G63059310	6729669	2	3	3	3	2	3	0	0	2	3	2	3	3	3	3	3	3	3	3	3
4	BICF2G63059316	6734863	3	3	3	3	3	3	3	3	3	3	3	3	3	3	3	3	3	3	3	3
4	BICF2S23711264	6738050	3	3	3	3	3	3	3	3	3	3	3	3	3	3	3	3	3	3	3	3
4	BICF2G63059332	6746743	2	4	4	4	2	4	2	4	2	4	2	4	4	4	4	4	4	4	4	4
4	BICF2G63059343	6756338	1	3	3	3	1	3	1	3	1	3	1	3	3	3	3	3	3	3	3	3
4	BICF2G63059361	6769063	3	1	1	1	3	1	3	1	3	1	3	1	1	1	1	1	1	1	1	1
4	BICF2P808445	6779991	3	1	1	1	3	1	3	1	3	1	3	1	1	1	1	1	1	1	1	1
4	BICF2P660244	6789718	3	4	4	4	3	4	3	4	3	4	3	4	4	4	4	4	4	4	4	4
4	BICF2G63059395	6793339	4	2	2	2	4	2	4	2	4	2	4	2	2	2	2	2	2	2	2	2
4	BICF2G63059406	6798790	1	3	3	3	1	3	1	3	1	3	1	3	3	3	3	3	3	3	3	3
4	BICF2G63059424	6810011	3	3	3	3	3	3	3	3	3	3	3	3	3	3	3	3	3	3	3	3
4	BICF2G63059453	6830643	4	4	4	4	4	4	4	4	4	4	4	4	4	4	4	4	4	4	4	4
4	BICF2G63059477	6843360	4	4	4	4	4	4	4	4	4	4	4	4	4	4	4	4	4	4	4	4
4	BICF2G63059519	6855850	3	1	1	1	3	1	3	1	3	1	3	1	1	1	1	1	1	1	1	1
4	BICF2G63059528	6868884	2	2	2	2	2	2	2	2	2	2	2	2	2	2	2	2	2	2	2	2
4	BICF2G63059547	6881449	4	4	4	4	4	4	4	4	4	4	4	4	4	4	4	4	4	4	4	4
4	BICF2G63059567	6890816	2	2	2	2	2	2	2	2	2	2	2	2	2	2	2	2	2	2	2	2
4	BICF2G63059581	6904145	3	3	3	3	3	3	3	3	3	3	3	3	3	3	3	3	3	3	3	3
4	BICF2G63059603	6916074	4	4	4	4	4	4	4	4	4	4	4	4	4	4	4	4	4	4	4	4
4	BICF2P930818	6919959	2	2	2	2	2	2	2	2	2	2	2	2	2	2	2	2	2	2	2	2
4	BICF2G63059645	6924304	4	4	4	4	4	4	4	4	4	4	4	4	4	4	4	4	4	4	4	4
4	BICF2G63059677	6941011	2	2	2	2	2	2	2	2	2	2	2	2	2	2	2	2	2	2	2	2
4	BICF2S23043285	6957386	2	2	2	2	2	2	2	2	2	2	2	2	2	2	2	2	2	2	2	2
4	TIGRP2P63259_RS8514108	6963721	4	4	4	4	4	4	4	4	4	4	4	4	4	4	4	4	4	4	4	4
4	BICF2G63059692	6972856	3	3	3	3	3	3	3	3	3	3	3	3	3	3	3	3	3	3	3	3
4	BICF2G63059700	6989012	3	3	3	3	3	3	3	3	3	3	3	3	3	3	3	3	3	3	3	3
4	BICF2G63059705	6997593	4	2	2	2	4	2	4	2	4	2	4	2	2	2	2	2	2	2	2	2
4	BICF2G63059708	7012308	4	4	4	4	4	4	4	4	4	4	4	4	4	4	4	4	4	4	4	4
4	BICF2G63059710	7021671	4	4	4	4	4	4	4	4	4	4	4	4	4	4	4	4	4	4	4	4
4	BICF2P1257546	7035619	2	4	4	4	2	4	2	4	2	4	2	4	4	4	4	4	4	4	4	4
4	BICF2G63059713	7050378	4	4	4	4	4	4	4	4	4	4	4	4	4	4	4	4	4	4	4	4
4	BICF2S23225093	7051302	4	3	3	3	4	3	4	3	4	3	4	3	3	3	3	3	3	3	3	3
4	BICF2S2343749	7062910	1	3	3	3	1	3	1	3	1	3	1	3	3	3	3	3	3	3	3	3
4	BICF2G63059721	7078434	4	4	4	4	4	4	4	4	4	4	4	4	4	4	4	4	4	4	4	4
4	BICF2G63059724	7079408	2	2	2	2	2	2	2	2	2	2	2	2	2	2	2	2	2	2	2	2
4	BICF2G63059734	7086534	3	3	3	3	3	3	3	3	3	3	3	3	3	3	3	3	3	3	3	3
4	BICF2G63059752	7096917	3	3	3	3	3	3	3	3	3	3	3	3	3	3	3	3	3	3	3	3
4	BICF2S23432307	7112551	4	4	4	4	4	4	4	4	4	4	4	4	4	4	4	4	4	4	4	4
4	CHR4_7130293	7130293	2	2	2	2	2	2	2	2	2	2	2	2	2	2	2	2	2	2	2	2
4	CHR4_7130943	7130943	3	3	3	3	3	3	3	3	3	3	3	3	3	3	3	3	3	3	3	3
4	BICF2G63059758	7143496	3	3	3	3	3	3	3	3	3	3	3	3	3	3	3	3	3	3	3	3
4	BICF2G63059759	7161053	2	2	2	2	2	2	2	2	2	2	2	2	2	2	2	2	2	2	2	2
4	BICF2P1400506	7173646	1	1	1	1	1	1	1	1	1	1	1	1	1	1	1	1	1	1	1	1
4	BICF2P1400508	7178344	3	3	0	0	3	3	3	3	3	3	3	3	0	0	0	0	0	0	0	0
4	BICF2G63059776	7191364	4	4	4	4	4	4	4	4	4	4	4	4	4	4	4	4	4	4	4	4
4	CHR4_7195632	7195632	3	3	3	3	3	3	3	3	3	3	3	3	3	3	3	3	3	3	3	3
4	BICF2G63059795	7200542	2	2	2	2	2	2	2	2	2	2	2	2	2	2	2	2	2	2	2	2
4	BICF2G63059804	7217853	4	1	1	1	4	1	4	1	4	1	4	1	1	1	1	1	1	1	1	1
4	BICF2G63059807	7220775	1	3	3	3	1	3	1	3	1	3	1	3	3	3	3	3	3	3	3	3
4	CHR4_7221628	7221628	2	2	2	2	2	2	2	2	2	2	2	2	2	2	2	2	2	2	2	2
4	BICF2G63059808	7224389	1	1	1	1	1	1	1	1	1	1	1	1	1	1	1	1	1	1	1	1
4	CHR4_7232649	7232649	2	2	2	2	2	2	2	2	2	2	2	2	2	2	2	2	2	2	2	2
4	BICF2G63059818	7236256	3	1	1	1	3	1	3	1	3	1	3	1	1	1	1	1	1	1	1	1
4	CHR4_7238109	7238109	2	2	2	2	2	2	2	2	2	2	2	2	2	2	2	2	2	2	2	2
4	BICF2P176363	7238656	3	4	4	4	3	4	3	4	3	4	3	4	4	4	4	4	4	4	4	4
4	CHR4_7239038	7239038	1	1	1	1	1	1	1	1	1	1	1	1	1	1	1	1	1	1	1	1
4	CHR4_7240136	7240136	1	1	1	1	1	1	1	1	1	1	1	1	1	1	1	1	1	1	1	1
4	BICF2S23630490	7255468	4	4	4	4	4	4	4	4	4	4	4	4	4	4	4	4	4	4	4	4
4	BICF2P323650	7266135	2	4	4	4	2	4	2	4	2	4	2	4	4	4	4	4	4	4	4	4
4	BICF2P1351364	7272048	1	3	3	3	1	3	1	3	1	3	1	3	3	3	3	3	3	3	3	3
4	BICF2G63059828	7285663	2	2	2	2	2	2	2	2	2	2	2	2	2	2	2	2	2	2	2	2
4	BICF2P828088	7295039	1	3	3	3	1	3	1	3	1	3	1	3	3	3	3	3	3	3	3	3
4	BICF2P1322453	7313908	4	2	2	2	4	2	4	2	4	2	4	2	2	2	2	2	2	2	2	2
4	BICF2P127457	7319037	1	3	3	3	1	3	1	3	1	3	1	3	3	3	3	3	3	3	3	3
4	TIGRP2P57395_RS9109319	7327910	3	1	1	1	3	1	3	1	3	1	3	1	1	1	1	1	1	1	1	1
4	BICF2P907810	7349252	2	4	4	4	2	4	2	4	2	4	2	4	4	4	4	4	4	4	4	4
4	TIGRP2P57416_RS8840657	7361066	4	2	2	2	4	2	4	2	4	2	4	2	2	2	2	2	2	2	2	2
4	TIGRP2P57423_RS8902814	7364342	2	4	4	4	2	4	2	4	2	4	2	4	4	4	4	4	4	4	4	4
4	BICF2G63059840	7375847	4	2	2	2	4	2	4	2	4	2	4	2	2	2	2	2	2	2	2	2
4	BICF2G63059868	7387330	2	4	4	4	2	4	2	4	2	4	2	4	4	4	4	4	4	4	4	4
4	BICF2G63059878	7396724	4	2	2	2	4	2	4	2	4	2	4	2	2	2	2	2	2	2	2	2
4	BICF2G63059898	7410143	2	4	4	4	2	4	2	4	2	4	2	4	4	4	4	4	4	4	4	4
4	TIGRP2P57452_RS8704968	7421873	1	1	1	1	1	1	1	1	1	1	1	1	1	1	1	1	1	1	1	1
4	BICF2P727950	7432503	4	4	4	4	4	4	4	4	4	4	4	4	4	4	4	4	4	4	4	4
4	BICF2P1208529	7446793	4	2	2	2	4	2	4	2	4	2	4	2	2	2	2	2	2	2	2	2
4	BICF2S2364900	7453972	2	2	2	2	2	2	2	2	2	2	2	2	2	2	2	2	2	2	2	2
4	TIGRP2P57466_RS8829720	7466613	2	2	2	2	2	2	2	2	2	2	2	2	2	2	2	2	2	2	2	2
4	BICF2P451475	7483717	4	4	4	4	4	4	4	4	4	4	4	4	4	4	4	4	4	4	4	4
4	BICF2P167588	7494433	1	1	1	1	1	1	1	1	1	1	1	1	1	1	1	1	1	1	1	1
4	BICF2G63059951	7502498	2	4	4	4	2	4	2	4	2	4	2	4	4	4	4	4	4	4	4	4
4	BICF2S23244628	7511764	1	3	3	3	1	3	1	3	1	3	1	3	3	3	3	3	3	3	3	3
4	CHR4_7520716	7520716	2	2	2	2	2	2	2	2	2	2	2	2	2	2	2	2	2	2	2	2
4	BICF2P482598	7521038	2	2	2	2	2	2	2	2	2	2	2	2	2	2	2	2	2	2	2	2
4	CHR4_7522984	7522984	3	3	3	3	3	3	3	3	3	3	3	3	3	3	3	3	3	3	3	3
4	BICF2P1160747	7533030	2	2	2	2	2	2	2	2	2	2	2	2	2	2	2	2	2	2	2	2
4	BICF2S23135243	7537128	3	3	3	3	3	3	3	3	3	3	3	3	3	3	3	3	3	3	3	3
4	BICF2S23213151	7548771	3	1	1	1	3	1	3	1	3	1	3	1	1	1	1	1	1	1	1	1
4	CHR4_7553143	7553143	3	3	3	3	3	3	3	3	3	3	3	3	3	3	3	3	3	3	3	3
4	BICF2P933532	7564224	4	3	3	3	4	3	4	3	4	3	4	3	3	3	3	3	3	3	3	3
4	BICF2S23543606	7575520	3	3	3	3	3	3	3	3	3	3	3	3	3	3	3	3	3	3	3	3
4	BICF2P9878	7583685	3	1	1	1	3	1	3	1	3	1	3	1	1	1	1	1	1	1	1	1
4	BICF2P519671	7597119	4	2	2	2	4	2	4	2	4	2	4	2	2	2	2	2	2	2	2	2
4	TIGRP2P57490_RS8970982	7604048	2	2	2	2	2	2	2	2	2	2	2	2	2	2	2	2	2	2	2	2
4	BICF2S23751614	7623744	4	4	4	4	4	4	4	4	4	4	4	4	4	4	4	4	4	4	4	4
4	TIGRP2P57503_RS8931434	7630174	2	2	2	2	2	2	2	2	2	2	2	2	2	2	2	2	2	2	2	2
4	BICF2S23759219	7638457	2	4	4	4	2	4	2	4	2	4	2	4	4	4	4	4	4	4	4	4
4	BICF2P931639	7652179	3	1	1	1	3	1	3	1	3	1	3	1	1	1	1	1	1	1	1	1
4	TIGRP2P57510_RS8549449	7663520	4	2	2	2	4	2	4	2	4	2	4	2	2	2	2	2	2	2	2	2
4	BICF2P647671	7674062	2	4	4	4	2	4	2	4	2	4	2	4	4	4	4	4	4	4	4	4
4	TIGRP2P57521_RS8501540	7691025	3	3	3	3	3	3	3	3	3	3	3	3	3	3	3	3	3	3	3	3
4	TIGRP2P57524_RS8844941	7695374	4	4	4	4	4	4	4	4	4	4	4	4	4	4	4	4	4	4	4	4
4	TIGRP2P57531_RS8700187	7709813	4	4	4	4	4	4	4	4	4	4	4	4	4	4	4	4	4	4	4	4
4	BICF2S23351133	7718204	2	2	2	2	2	2	2	2	2	2	2	2	2	2	2	2	2	2	2	2
4	BICF2P632578	7731250	4	1	1	1	4	1	4	1	4	1	4	1	1	1	1	1	1	1	1	1
4	BICF2P560793	7747142	1	1	1	1	1	1	1	1	1	1	1	1	1	1	1	1	1	1	1	1
4	BICF2P1277160	7753359	3	3	3	3	3	3	3	3	3	3	3	3	3	3	3	3	3	3	3	3
4	TIGRP2P57553_RS8919624	7768747	3	3	3	3	3	3	3	3	3	3	3	3	3	3	3	3	3	3	3	3
4	BICF2S24117094	7769807	4	4	4	4	4	4	4	4	4	4	4	4	4	4	4	4	4	4	4	4
4	TIGRP2P57560_RS8845953	7785323	1	3	3	3	1	3	1	3	1	3	1	3	3	3	3	3	3	3	3	3
4	BICF2P199224	7790533	2	2	2	2	2	2	2	2	2	2	2	2	2	2	2	2	2	2	2	2
4	BICF2S2441382	7809687	1	3	3	3	1	3	1	3	1	3	1	3	3	3	3	3	3	3	3	3
4	BICF2P1134779	7812508	3	1	1	1	3	1	3	1	3	1	3	1	1	1	1	1	1	1	1	1
4	CHR4_7821708	7821708	3	3	3	3	3	3	3	3	3	3	3	3	3	3	3	3	3	3	3	3
4	BICF2P920438	7822634	2	4	4	4	2	4	2	4	2	4	2	4	4	4	4	4	4	4	4	4
4	TIGRP2P57578_RS8991287	7835086	4	4	4	4	4	4	4	4	4	4	4	4	4	4	4	4	4	4	4	4
4	BICF2P815948	7852295	3	1	1	1	3	1	3	1	3	1	3	1	1	1	1	1	1	1	1	1
4	BICF2P451621	7858823	1	1	1	1	1	1	1	1	1	1	1	1	1	1	1	1	1	1	1	1
4	BICF2P341	7869175	1	1	1	1	1	1	1	1	1	1	1	1	1	1	1	1	1	1	1	1
4	BICF2S23217229	7884431	3	1	1	1	3	1	3	1	3	1	3	1	1	1	1	1	1	1	1	1
4	BICF2S23125016	7891362	4	2	2	2	4	2	4	2	4	2	4	2	2	2	2	2	2	2	2	2
4	BICF2P1188198	7909948	1	1	1	1	1	1	1	1	1	1	1	1	1	1	1	1	1	1	1	1
4	BICF2P1293980	7916918	3	3	3	3	3	3	3	3	3	3	3	3	3	3	3	3	3	3	3	3
4	BICF2P663168	7933762	2	2	2	2	2	2	2	2	2	2	2	2	2	2	2	2	2	2	2	2
4	CHR4_7934637	7934637	3	3	3	3	3	3	3	3	3	3	3	3	3	3	3	3	3	3	3	3
4	CHR4_7936245	7936245	0	0	0	0	0	0	0	0	0	0	0	0	0	0	0	0	0	0	0	0
4	CHR4_7936612	7936612	4	4	4	4	4	4	4	4	4	4	4	4	4	4	4	4	4	4	4	4
4	BICF2S23754260	7937309	4	4	4	4	4	4	4	4	4	4	4	4	4	4	4	4	4	4	4	4
4	CHR4_7938605	7938605	1	1	1	1	1	1	1	1	1	1	1	1	1	1	1	1	1	1	1	1
4	CHR4_7938913	7938913	3	3	3	3	3	3	3	3	3	3	3	3	3	3	3	3	3	3	3	3
4	BICF2P895920	7940664	2	2	2	2	2	2	2	2	2	2	2	2	2	2	2	2	2	2	2	2
4	BICF2P585765	7957893	2	2	2	2	2	2	2	2	2	2	2	2	2	2	2	2	2	2	2	2
4	BICF2P1012453	7959802	1	1	1	1	1	1	1	1	1	1	1	1	1	1	1	1	1	1	1	1
4	BICF2S23334144	7976062	2	2	2	2	2	2	2	2	2	2	2	2	2	2	2	2	2	2	2	2
4	BICF2P665864	7991134	3	3	3	3	3	3	3	3	3	3	3	3	3	3	3	3	3	3	3	3
4	BICF2S23626750	8025029	2	2	2	2	2	2	2	2	2	2	2	2	2	2	2	2	2	2	2	2
4	BICF2S23350717	8031926	4	4	4	4	4	4	4	4	4	4	4	4	4	4	4	4	4	4	4	4
4	BICF2P958660	8055165	4	4	4	4	4	4	4	4	4	4	4	4	4	4	4	4	4	4	4	4
4	BICF2P180344	8070951	2	2	2	2	2	2	2	2	2	2	2	2	2	2	2	2	2	2	2	2
4	BICF2P321674	8078312	2	2	2	2	2	2	2	2	2	2	2	2	2	2	2	2	2	2	2	2
4	TIGRP2P57638_RS8808935	8091995	3	3	3	3	3	3	3	3	3	3	3	3	3	3	3	3	3	3	3	3
4	BICF2S22910336	8104874	1	3	3	3	1	3	1	3	1	3	1	3	3	3	3	3	3	3	3	3
4	CHR4_8108403	8108403	4	4	4	4	4	4	4	4	4	4	4	4	4	4	4	4	4	4	4	4
4	BICF2P1296368	8111847	2	2	2	2	2	2	2	2	2	2	2	2	2	2	2	2	2	2	2	2
4	BICF2P351675	8121406	1	1	1	1	1	1	1	1	1	1	1	1	1	1	1	1	1	1	1	1
4	BICF2P757529	8136900	1	1	1	1	1	1	1	1	1	1	1	1	1	1	1	1	1	1	1	1
4	BICF2P918609	8145822	3	3	3	3	3	3	3	3	3	3	3	3	3	3	3	3	3	3	3	3
4	CHR4_8154015	8154015	2	2	2	2	2	2	2	2	2	2	2	2	2	2	2	2	2	2	2	2
4	CHR4_8154987	8154987	4	4	4	4	4	4	4	4	4	4	4	4	4	4	4	4	4	4	4	4
4	CHR4_8158005	8158005	3	3	3	3	3	3	3	3	3	3	3	3	3	3	3	3	3	3	3	3
4	BICF2S23534372	8164482	2	4	4	4	2	4	2	4	2	4	2	4	4	4	4	4	4	4	4	4
4	TIGRP2P57658_RS8800374	8169814	2	4	4	4	2	4	2	4	2	4	2	4	4	4	4	4	4	4	4	4
4	BICF2S229489	8180673	3	1	1	1	3	1	3	1	3	1	3	1	1	1	1	1	1	1	1	1
4	TIGRP2P57662_RS8966887	8197189	2	2	2	2	2	2	2	2	2	2	2	2	2	2	2	2	2	2	2	2
4	BICF2P624536	8201870	2	2	2	2	2	2	2	2	2	2	2	2	2	2	2	2	2	2	2	2
4	CHR4_8204839	8204839	1	1	1	1	1	1	1	1	1	1	1	1	1	1	1	1	1	1	1	1
4	BICF2S2395826	8205634	1	1	1	1	1	1	1	1	1	1	1	1	1	1	1	1	1	1	1	1
4	CHR4_8210348	8210349	6	6	6	6	6	6	6	6	6	6	6	6	6	6	6	6	6	6	6	6
4	CHR4_8211497	8211497	1	1	1	1	1	1	1	1	1	1	1	1	1	1	1	1	1	1	1	1
4	CHR4_8212914	8212914	2	2	2	2	2	2	2	2	2	2	2	2	2	2	2	2	2	2	2	2
4	BICF2P259811	8218767	1	1	1	1	1	1	1	1	1	1	1	1	1	1	1	1	1	1	1	1
4	BICF2P1128661	8224740	4	4	4	4	4	4	4	4	4	4	4	4	4	4	4	4	4	4	4	4
4	BICF2P110282	8239634	3	3	3	3	3	3	3	3	3	3	3	3	3	3	3	3	3	3	3	3
4	BICF2P611373	8250087	3	4	4	4	3	4	3	4	3	4	3	4	4	4	4	4	4	4	4	4
4	BICF2P242773	8261659	3	3	3	3	3	3	3	3	3	3	3	3	3	3	3	3	3	3	3	3
4	BICF2P1200311	8289737	4	4	4	4	4	4	4	4	4	4	4	4	4	4	4	4	4	4	4	4
4	BICF2S2334764	8293384	3	1	1	1	3	1	3	1	3	1	3	1	1	1	1	1	1	1	1	1
4	TIGRP2P57690_RS9032108	8316029	3	1	1	1	3	1	3	1	3	1	3	1	1	1	1	1	1	1	1	1
4	BICF2P743775	8321893	1	1	1	1	1	1	1	1	1	1	1	1	1	1	1	1	1	1	1	1
4	BICF2P1262371	8330482	3	3	3	3	3	3	3	3	3	3	3	3	3	3	3	3	3	3	3	3
4	TIGRP2P57712_RS8971448	8341035	4	4	4	4	4	4	4	4	4	4	4	4	4	4	4	4	4	4	4	4
4	BICF2S23238466	8357451	4	2	2	2	4	2	4	2	4	2	4	2	2	2	2	2	2	2	2	2
4	BICF2P601972	8371355	3	3	3	3	3	3	3	3	3	3	3	3	3	3	3	3	3	3	3	3
4	TIGRP2P57721_RS8679660	8379735	3	1	1	1	3	1	3	1	3	1	3	1	1	1	1	1	1	1	1	1
4	BICF2S22929630	8386086	2	2	2	2	2	2	2	2	2	2	2	2	2	2	2	2	2	2	2	2
4	BICF2S23423338	8393711	1	1	1	1	1	1	1	1	1	1	1	1	1	1	1	1	1	1	1	1
4	BICF2S23423673	8396989	3	1	1	1	3	1	3	1	3	1	3	1	1	1	1	1	1	1	1	1
4	CHR4_8408358	8408358	3	3	3	3	3	3	3	3	3	3	3	3	3	3	3	3	3	3	3	3
4	CHR4_8408974	8408974	2	2	2	2	2	2	2	2	2	2	2	2	2	2	2	2	2	2	2	2
4	CHR4_8409048	8409048	3	3	3	3	3	3	3	3	3	3	3	3	3	3	3	3	3	3	3	3
4	CHR4_8409103	8409103	2	4	4	4	2	4	2	4	2	4	2	4	4	4	4	4	4	4	4	4
4	BICF2S23346314	8413912	3	3	3	3	3	3	3	3	3	3	3	3	3	3	3	3	3	3	3	3
4	TIGRP2P57736_RS9159810	8423937	2	2	2	2	2	2	2	2	2	2	2	2	2	2	2	2	2	2	2	2
4	CHR4_8425039	8425039	3	3	3	3	3	3	3	3	3	3	3	3	3	3	3	3	3	3	3	3
4	BICF2S2317743	8439906	4	4	4	4	4	4	4	4	4	4	4	4	4	4	4	4	4	4	4	4
4	TIGRP2P57743_RS9037658	8447348	3	3	3	3	3	3	3	3	3	3	3	3	3	3	3	3	3	3	3	3
4	TIGRP2P57745_RS8700313	8457307	1	1	1	1	1	1	1	1	1	1	1	1	1	1	1	1	1	1	1	1
4	BICF2P1296710	8465989	3	3	3	3	3	3	3	3	3	3	3	3	3	3	3	3	3	3	3	3
4	BICF2P1404045	8486221	4	4	4	4	4	4	4	4	4	4	4	4	4	4	4	4	4	4	4	4
4	TIGRP2P57752_RS8939284	8493977	1	1	1	1	1	1	1	1	1	1	1	1	1	1	1	1	1	1	1	1
4	BICF2P1353184	8505869	2	2	2	2	2	2	2	2	2	2	2	2	2	2	2	2	2	2	2	2
4	BICF2P1090788	8512801	2	2	2	2	2	2	2	2	2	2	2	2	2	2	2	2	2	2	2	2
4	BICF2P892618	8527629	2	2	2	2	2	2	2	2	2	2	2	2	2	2	2	2	2	2	2	2
4	BICF2P97261	8537829	2	2	2	2	2	2	2	2	2	2	2	2	2	2	2	2	2	2	2	2
4	BICF2S23111075	8548223	4	4	4	4	4	4	4	4	4	4	4	4	4	4	4	4	4	4	4	4
4	CHR4_8558150	8558150	4	4	4	4	4	4	4	4	4	4	4	4	4	4	4	4	4	4	4	4
4	BICF2P188752	8559202	1	1	1	1	1	1	1	1	1	1	1	1	1	1	1	1	1	1	1	1
4	CHR4_8562447	8562447	3	3	3	3	3	3	3	3	3	3	3	3	3	3	3	3	3	3	3	3
4	CHR4_8563210	8563210	4	4	4	4	4	4	4	4	4	4	4	4	4	4	4	4	4	4	4	4
4	CHR4_8563603	8563603	2	2	2	2	2	2	2	2	2	2	2	2	2	2	2	2	2	2	2	2
4	CHR4_8564119	8564119	2	2	2	2	2	2	2	2	2	2	2	2	2	2	2	2	2	2	2	2
4	BICF2S23756460	8579594	4	4	4	4	4	4	4	4	4	4	4	4	4	4	4	4	4	4	4	4
4	BICF2P886367	8585443	2	4	4	4	2	4	2	4	2	4	2	4	4	4	4	4	4	4	4	4
4	BICF2S22959780	8605095	4	4	4	4	4	4	4	4	4	4	4	4	4	4	4	4	4	4	4	4
4	CHR4_8613537	8613537	1	1	1	1	1	1	1	1	1	1	1	1	1	1	1	1	1	1	1	1
4	CHR4_8613822	8613822	3	3	3	3	3	3	3	3	3	3	3	3	3	3	3	3	3	3	3	3
4	TIGRP2P57805_RS8807437	8624665	3	3	3	3	3	3	3	3	3	3	3	3	3	3	3	3	3	3	3	3
4	CHR4_8634779	8634779	4	2	2	2	4	2	4	2	4	2	4	2	2	2	2	2	2	2	2	2
4	BICF2P1072889	8637787	2	2	2	2	2	2	2	2	2	2	2	2	2	2	2	2	2	2	2	2
4	BICF2P735412	8648974	3	3	3	3	3	3	3	3	3	3	3	3	3	3	3	3	3	3	3	3
4	TIGRP2P57819_RS9104722	8669611	2	4	4	4	2	4	2	4	2	4	2	4	4	4	4	4	4	4	4	4
4	CHR4_8680882	8680882	3	3	3	3	3	3	3	3	3	3	3	3	3	3	3	3	3	3	3	3
4	BICF2P368665	8683632	1	4	4	4	1	4	1	4	1	4	1	4	4	4	4	4	4	4	4	4
4	BICF2S22916622	8688262	1	1	1	1	1	1	1	1	1	1	1	1	1	1	1	1	1	1	1	1
4	CHR4_8690690	8690690	3	3	3	3	3	3	3	3	3	3	3	3	3	3	3	3	3	3	3	3
4	CHR4_8693777	8693777	2	2	2	2	2	2	2	2	2	2	2	2	2	2	2	2	2	2	2	2
4	BICF2P981493	8702015	3	1	1	1	3	1	3	1	3	1	3	1	1	1	1	1	1	1	1	1
4	BICF2P981494	8702442	3	3	3	3	3	3	3	3	3	3	3	3	3	3	3	3	3	3	3	3
4	TIGRP2P57837_RS8947544	8710837	3	3	3	3	3	3	3	3	3	3	3	3	3	3	3	3	3	3	3	3
4	BICF2P1157316	8725579	3	1	1	1	3	1	3	1	3	1	3	1	1	1	1	1	1	1	1	1
4	BICF2S2311222	8732035	1	3	3	3	1	3	1	3	1	3	1	3	3	3	3	3	3	3	3	3
4	TIGRP2P57843_RS9186192	8750858	4	4	4	4	4	4	4	4	4	4	4	4	4	4	4	4	4	4	4	4
4	BICF2P981907	8757981	2	1	1	1	2	1	2	1	2	1	2	1	1	1	1	1	1	1	1	1
4	BICF2S23436474	8774309	1	3	3	3	1	3	1	3	1	3	1	3	3	3	3	3	3	3	3	3
4	BICF2S23123369	8777132	3	3	3	3	3	3	3	3	3	3	3	3	3	3	3	3	3	3	3	3
4	BICF2S2358901	8804104	1	3	3	3	1	3	1	3	1	3	1	3	3	3	3	3	3	3	3	3
4	TIGRP2P57869_RS9191153	8814289	3	3	3	3	3	3	3	3	3	3	3	3	3	3	3	3	3	3	3	3
4	BICF2P132080	8822873	3	1	1	1	3	1	3	1	3	1	3	1	1	1	1	1	1	1	1	1
4	BICF2P278885	8838740	3	4	4	4	3	4	3	4	3	4	3	4	4	4	4	4	4	4	4	4
4	TIGRP2P57881_RS8961832	8845936	3	4	4	4	3	4	3	4	3	4	3	4	4	4	4	4	4	4	4	4
4	TIGRP2P57883_RS8580039	8865101	1	1	1	1	1	1	1	1	1	1	1	1	1	1	1	1	1	1	1	1
4	BICF2S23424043	8874555	4	3	3	3	4	3	4	3	4	3	4	3	3	3	3	3	3	3	3	3
4	BICF2P882978	8888523	3	4	4	4	3	4	3	4	3	4	3	4	4	4	4	4	4	4	4	4
4	TIGRP2P57896_RS8655143	8894357	2	2	2	2	2	2	2	2	2	2	2	2	2	2	2	2	2	2	2	2
4	BICF2P314900	8903969	3	3	3	3	3	3	3	3	3	3	3	3	3	3	3	3	3	3	3	3
4	TIGRP2P57901_RS8902381	8923348	3	3	4	3	4	3	4	3	4	3	3	3	4	3	3	3	3	3	3	3
4	BICF2P1207246	8928924	2	2	2	2	2	2	2	2	2	2	2	2	2	2	2	2	2	2	2	2
4	BICF2P1178269	8945756	3	1	1	1	3	1	3	1	3	1	3	1	1	1	1	1	1	1	1	1
4	TIGRP2P57908_RS9134168	8950686	4	3	4	3	3	3	3	3	3	3	4	3	4	3	4	4	4	4	4	4
4	BICF2P702720	8970080	3	3	3	3	3	3	3	3	3	3	3	3	3	3	3	3	3	3	3	3
4	TIGRP2P57914_RS8851318	8979497	3	3	4	3	4	3	4	3	4	3	3	3	4	3	3	3	3	3	3	3
4	BICF2S23330000	8984996	4	1	4	1	1	1	1	1	1	1	4	1	4	1	4	4	4	4	4	4
4	BICF2P270545	9001172	1	3	1	3	3	3	3	3	3	3	1	3	1	3	1	1	1	1	1	1
4	BICF2P890428	9001594	3	1	3	1	3	3	3	3	3	3	3	1	3	1	1	1	1	1	1	1
4	BICF2P400214	9006796	3	1	3	1	1	1	1	1	1	1	3	1	3	1	3	3	3	3	3	3
4	BICF2P710815	9013436	1	1	3	1	3	1	3	1	3	1	1	1	3	1	1	1	1	1	1	1
4	BICF2P24388	9024347	2	2	2	2	2	2	2	2	2	2	2	2	2	2	2	2	2	2	2	2
4	BICF2P24389	9025040	3	4	3	4	4	4	4	4	4	4	3	4	3	4	3	3	3	3	3	3
4	BICF2P786414	9025728	4	4	4	4	4	4	4	4	4	4	4	4	4	4	4	4	4	4	4	4
4	BICF2P666014	9032890	1	1	1	1	1	1	1	1	1	1	1	1	1	1	1	1	1	1	1	1
4	BICF2P1186214	9044583	2	2	2	2	2	2	2	2	2	2	2	2	2	2	2	2	2	2	2	2
4	BICF2P1359617	9055976	3	3	1	3	1	3	1	3	1	3	3	3	1	3	3	3	3	3	3	3
4	CHR4_9056643	9056643	1	1	3	1	3	1	3	1	3	1	1	1	3	1	1	1	1	1	1	1
4	BICF2P1359619	9056829	1	1	1	1	1	1	1	1	1	1	1	1	1	1	1	1	1	1	1	1
4	CHR4_9057160	9057160	2	2	2	2	2	2	2	2	2	2	2	2	2	2	2	2	2	2	2	2
4	BICF2S23410202	9067714	3	3	3	3	3	3	3	3	3	3	3	3	3	3	3	3	3	3	3	3
4	BICF2P854882	9082631	1	1	3	1	3	1	3	1	3	1	1	1	3	1	1	1	1	1	1	1
4	BICF2P1245819	9087651	2	2	4	2	4	2	4	2	4	2	2	2	4	2	2	2	2	2	2	2
4	BICF2P472642	9106056	1	1	1	1	1	1	1	1	1	1	1	1	1	1	1	1	1	1	1	1
4	TIGRP2P57981_RS8615873	9118090	4	4	2	4	2	4	2	4	2	4	4	4	2	4	4	4	4	4	4	4
4	BICF2S23736912	9125287	2	2	4	2	4	2	4	2	4	2	2	2	4	2	2	2	2	2	2	2
4	TIGRP2P57985_RS8935677	9153630	3	3	3	3	3	3	3	3	3	3	3	3	3	3	3	3	3	3	3	3
4	BICF2S23134354	9173996	1	1	2	1	2	1	2	1	2	1	1	1	2	1	1	1	1	1	1	1
4	TIGRP2P57997_RS8893004	9185320	3	3	1	3	1	3	1	3	1	3	3	3	1	3	3	3	3	3	3	3
4	BICF2P1062649	9193156	1	3	3	3	1	3	1	3	1	3	1	3	3	3	3	3	3	3	3	3
4	TIGRP2P58008_RS8708807	9206746	1	1	1	1	1	1	1	1	1	1	1	1	1	1	1	1	1	1	1	1
4	BICF2P676133	9215540	2	2	2	2	2	2	2	2	2	2	2	2	2	2	2	2	2	2	2	2
4	BICF2P267164	9233605	3	3	3	3	3	3	3	3	3	3	3	3	3	3	3	3	3	3	3	3
4	BICF2P1111571	9240316	4	4	2	4	2	4	2	4	2	4	4	4	2	4	4	4	4	4	4	4
4	TIGRP2P58028_RS9197093	9259808	1	1	1	1	1	1	1	1	1	1	1	1	1	1	1	1	1	1	1	1
4	BICF2P1234824	9261990	1	3	1	3	3	3	3	3	3	3	1	3	1	3	1	1	1	1	1	1
4	BICF2P456092	9273320	4	2	4	2	2	2	2	2	2	2	4	2	4	2	0	0	0	0	0	0
4	BICF2P1268908	9289868	3	3	1	3	1	3	1	3	1	3	3	3	1	3	3	3	3	3	3	3
4	BICF2P434832	9302495	2	4	2	4	4	4	4	4	4	4	2	4	2	4	2	2	2	2	2	2
4	BICF2S23216140	9308941	3	3	3	3	3	3	3	3	3	3	3	3	3	3	3	3	3	3	3	3
4	BICF2P887506	9321036	3	3	3	3	3	3	3	3	3	3	3	3	3	3	3	3	3	3	3	3
4	BICF2S23211920	9325557	4	4	4	4	4	4	4	4	4	4	4	4	4	4	4	4	4	4	4	4
4	BICF2P496748	9339348	4	4	4	4	4	4	4	4	4	4	4	4	4	4	4	4	4	4	4	4
4	BICF2P858077	9350166	3	3	3	3	3	3	3	3	3	3	3	3	3	3	3	3	3	3	3	3
4	BICF2P156545	9361934	3	3	3	3	3	3	3	3	3	3	3	3	3	3	3	3	3	3	3	3
4	BICF2P946407	9368674	2	2	2	2	2	2	2	2	2	2	2	2	2	2	2	2	2	2	2	2
4	BICF2P853260	9383480	1	4	4	4	1	4	1	4	1	4	1	4	4	4	4	4	4	4	4	4
4	TIGRP2P58057_RS9024399	9389287	1	1	1	1	1	1	1	1	1	1	1	1	1	1	1	1	1	1	1	1
4	BICF2P1078708	9407768	2	4	4	4	2	4	2	4	2	4	2	4	4	4	4	4	4	4	4	4
4	BICF2P208658	9412818	2	2	2	2	2	2	2	2	2	2	2	2	2	2	2	2	2	2	2	2
4	BICF2S23344148	9421190	1	3	3	3	1	3	1	3	1	3	1	3	3	3	3	3	3	3	3	3
4	TIGRP2P58066_RS9153249	9440494	4	4	4	4	4	4	4	4	4	4	4	4	4	4	4	4	4	4	4	4
4	BICF2S23425231	9450222	3	3	3	3	3	3	3	3	3	3	3	3	3	3	3	3	3	3	3	3
4	TIGRP2P58072_RS8795672	9461717	3	3	3	3	3	3	3	3	3	3	3	3	3	3	3	3	3	3	3	3
4	BICF2P299953	9469459	2	2	1	2	1	2	1	2	1	2	2	2	1	2	2	2	2	2	2	2
4	TIGRP2P58082_RS9034415	9480697	1	1	1	1	1	1	1	1	1	1	1	1	1	1	1	1	1	1	1	1
4	BICF2S23426812	9496106	2	2	2	2	2	2	2	2	2	2	2	2	2	2	2	2	2	2	2	2
4	BICF2P728	9510782	3	3	3	3	3	3	3	3	3	3	3	3	3	3	3	3	3	3	3	3
4	BICF2S233614	9522170	3	3	3	3	3	3	3	3	3	3	3	3	3	3	3	3	3	3	3	3
4	BICF2P1256653	9528721	4	4	3	4	3	4	3	4	3	4	4	4	3	4	4	4	4	4	4	4
4	BICF2P382448	9536196	2	2	2	2	2	2	2	2	2	2	2	2	2	2	2	2	2	2	2	2
4	BICF2S23531953	9557766	1	1	3	1	3	1	3	1	3	1	1	1	3	1	1	1	1	1	1	1
4	BICF2P1197175	9573653	1	1	3	1	3	1	3	1	3	1	1	1	3	1	1	1	1	1	1	1
4	BICF2P429655	9583437	4	4	4	4	4	4	4	4	4	4	4	4	4	4	4	4	4	4	4	4
4	BICF2P624126	9596359	3	1	3	1	1	1	1	1	1	1	3	1	3	1	3	3	3	3	3	3
4	BICF2P996422	9615602	3	1	3	1	1	1	1	1	1	1	3	1	3	1	3	3	3	3	3	3
4	CHR4_9617353	9617353	2	3	2	3	3	3	3	3	3	3	2	3	2	3	2	2	2	2	2	2
4	BICF2P377699	9621761	3	3	1	3	1	3	1	3	1	3	3	3	1	3	3	3	3	3	3	3
4	TIGRP2P58125_RS8850151	9635061	1	3	1	3	3	3	3	3	3	3	1	3	1	3	1	1	1	1	1	1
4	CHR4_9637382	9637382	3	4	3	4	4	4	4	4	4	4	3	4	3	4	3	3	3	3	3	3
4	CHR4_9637889	9637889	3	3	3	3	3	3	3	3	3	3	3	3	3	3	3	3	3	3	3	3
4	BICF2P460911	9641388	2	4	2	4	4	4	4	4	4	4	2	4	2	4	2	2	2	2	2	2
4	BICF2P424964	9651342	2	2	2	2	2	2	2	2	2	2	2	2	2	2	2	2	2	2	2	2
4	BICF2P745627	9663120	1	1	4	1	4	1	4	1	4	1	1	1	4	1	1	1	1	1	1	1
4	BICF2P1394798	9679094	4	3	4	3	3	3	3	3	3	3	4	3	4	3	4	4	4	4	4	4
4	BICF2P926403	9702237	3	1	3	1	1	1	1	1	1	1	3	1	3	1	3	3	3	3	3	3
4	CHR4_9708940	9708940	2	4	4	4	2	4	2	4	2	4	2	4	4	4	4	4	4	4	4	4
4	CHR4_9709453	9709453	3	1	3	1	1	1	1	1	1	1	3	1	3	1	3	3	3	3	3	3
4	CHR4_9709695	9709695	1	2	2	2	1	2	1	2	1	2	1	2	2	2	2	2	2	2	2	2
4	BICF2P148676	9714360	4	4	2	4	2	4	2	4	2	4	4	4	2	4	4	4	4	4	4	4
4	BICF2S2322605	9733057	4	4	4	4	4	4	4	4	4	4	4	4	4	4	4	4	4	4	4	4
4	CHR4_9745651	9745651	3	3	3	3	3	3	3	3	3	3	3	3	3	3	3	3	3	3	3	3
4	BICF2P214560	9745891	4	2	4	2	2	2	2	2	2	2	4	2	4	2	4	4	4	4	4	4
4	BICF2P240658	9756234	2	4	2	4	4	4	4	4	4	4	2	4	2	4	2	2	2	2	2	2
4	TIGRP2P58159_RS8655839	9769602	4	3	4	3	3	3	3	3	3	3	4	3	4	3	4	4	4	4	4	4
4	CHR4_9770286	9770286	2	2	4	2	4	2	4	2	4	2	2	2	4	2	2	2	2	2	2	2
4	TIGRP2P58164_RS8939463	9779149	2	4	2	4	4	4	4	4	4	4	2	4	2	4	2	2	2	2	2	2
4	TIGRP2P58167_RS9236482	9791480	3	1	3	1	1	1	1	1	1	1	3	1	3	1	3	3	3	3	3	3
4	TIGRP2P58173_RS8919280	9803528	1	3	1	3	3	3	3	3	3	3	1	3	1	3	1	1	1	1	1	1
4	CHR4_9815285	9815285	1	1	1	1	1	1	1	1	1	1	1	1	1	1	1	1	1	1	1	1
4	CHR4_9815456	9815456	2	2	4	2	4	2	4	2	4	2	2	2	4	2	2	2	2	2	2	2
4	BICF2P1254283	9818239	3	3	3	3	3	3	3	3	3	3	3	3	3	3	3	3	3	3	3	3
4	BICF2P1144717	9826887	2	2	3	2	3	2	3	2	3	2	2	2	3	2	2	2	2	2	2	2
4	BICF2P127328	9835813	4	4	2	4	2	4	2	4	2	4	4	4	2	4	4	4	4	4	4	4
4	BICF2S2393270	9846487	1	3	1	3	3	3	3	3	3	3	1	3	1	3	1	1	1	1	1	1
4	BICF2S23231829	9847720	1	3	1	3	3	3	3	3	3	3	1	3	1	3	1	1	1	1	1	1
4	TIGRP2P58198_RS8903284	9862642	2	1	2	1	2	2	2	2	2	2	2	1	2	1	1	1	1	1	1	1
4	BICF2S23735826	9876652	4	4	4	4	4	4	4	4	4	4	4	4	4	4	4	4	4	4	4	4
4	BICF2P160586	9887360	1	4	1	4	4	4	4	4	4	4	1	4	1	4	1	1	1	1	1	1
4	BICF2P292779	9892556	1	3	1	3	3	3	3	3	3	3	1	3	1	3	1	1	1	1	1	1
4	CHR4_9894306	9894306	2	2	2	2	2	2	2	2	2	2	2	2	2	2	2	2	2	2	2	2
4	CHR4_9894749	9894749	3	4	3	4	4	4	4	4	4	4	3	4	3	4	3	3	3	3	3	3
4	CHR4_9896169	9896169	1	1	3	1	3	1	3	1	3	1	1	1	3	1	1	1	1	1	1	1
4	CHR4_9896664	9896664	4	4	4	4	4	4	4	4	4	4	4	4	4	4	4	4	4	4	4	4
4	CHR4_9897205	9897205	2	2	1	2	1	2	1	2	1	2	2	2	1	2	2	2	2	2	2	2
4	BICF2P168447	9912490	1	3	1	3	1	1	1	1	1	1	1	3	1	3	3	3	3	3	3	3
4	TIGRP2P58201_RS8500223	9916168	3	1	1	1	3	1	3	1	3	1	3	1	1	1	1	1	1	1	1	1
4	BICF2P1308505	9927440	1	3	3	3	1	3	1	3	1	3	1	3	3	3	3	3	3	3	3	3
4	BICF2P1023107	9956692	3	2	3	2	3	3	3	3	3	3	3	2	3	2	2	2	2	2	2	2
4	BICF2S23038612	9966423	1	1	1	1	1	1	1	1	1	1	1	1	1	1	1	1	1	1	1	1
4	BICF2P1225769	9974081	3	3	3	3	3	3	3	3	3	3	3	3	3	3	3	3	3	3	3	3
4	TIGRP2P58257_RS8539459	9985976	3	1	1	1	3	1	3	1	3	1	3	1	1	1	1	1	1	1	1	1
4	BICF2S2368979	9996152	3	3	3	3	3	3	3	3	3	3	3	3	3	3	3	3	3	3	3	3
4	BICF2P1361260	10007462	4	4	4	4	4	4	4	4	4	4	4	4	4	4	4	4	4	4	4	4
4	BICF2P1382895	10027653	4	4	4	4	4	4	4	4	4	4	4	4	4	4	4	4	4	4	4	4
4	BICF2P75271	10032591	4	4	4	4	4	4	4	4	4	4	4	4	4	4	4	4	4	4	4	4
4	BICF2P594521	10042235	2	2	2	2	2	2	2	2	2	2	2	2	2	2	2	2	2	2	2	2
4	BICF2P645511	10052897	2	2	2	2	2	2	2	2	2	2	2	2	2	2	2	2	2	2	2	2
4	BICF2P687550	10073649	4	4	4	4	4	4	4	4	4	4	4	4	4	4	4	4	4	4	4	4
4	BICF2P1239654	10080581	2	2	2	2	2	2	2	2	2	2	2	2	2	2	2	2	2	2	2	2
4	TIGRP2P58276_RS8941962	10088636	2	2	2	2	2	2	2	2	2	2	2	2	2	2	2	2	2	2	2	2
4	BICF2P976790	10098311	4	4	4	4	4	4	4	4	4	4	4	4	4	4	4	4	4	4	4	4
4	TIGRP2P58278_RS9190523	10107577	3	3	3	3	3	3	3	3	3	3	3	3	3	3	3	3	3	3	3	3
4	BICF2P1354458	10110228	3	3	3	3	3	3	3	3	3	3	3	3	3	3	3	3	3	3	3	3
4	BICF2P1354457	10110260	4	4	4	4	4	4	4	4	4	4	4	4	4	4	4	4	4	4	4	4
4	BICF2P350472	10115447	3	3	3	3	3	3	3	3	3	3	3	3	3	3	3	3	3	3	3	3
4	BICF2P275052	10128403	3	3	3	3	3	3	3	3	3	3	3	3	3	3	3	3	3	3	3	3
4	BICF2P907835	10135668	3	3	3	3	3	3	3	3	3	3	3	3	3	3	3	3	3	3	3	3
4	BICF2P718747	10146612	2	2	2	2	2	2	2	2	2	2	2	2	2	2	2	2	2	2	2	2
4	BICF2P549614	10154169	4	4	4	4	4	4	4	4	4	4	4	4	4	4	4	4	4	4	4	4
4	BICF2P259212	10162832	1	1	1	1	1	1	1	1	1	1	1	1	1	1	1	1	1	1	1	1
4	BICF2P958627	10171604	3	3	3	3	3	3	3	3	3	3	3	3	3	3	3	3	3	3	3	3
4	TIGRP2P58300_RS8994708	10179160	3	3	3	3	3	3	3	3	3	3	3	3	3	3	3	3	3	3	3	3
4	BICF2P906082	10193132	1	1	1	1	1	1	1	1	1	1	1	1	1	1	1	1	1	1	1	1
4	BICF2P190494	10213361	3	3	3	3	3	3	3	3	3	3	3	3	3	3	3	3	3	3	3	3
4	BICF2P99176	10213973	3	3	3	3	3	3	3	3	3	3	3	3	3	3	3	3	3	3	3	3
4	BICF2P172189	10233365	4	4	4	4	4	4	4	4	4	4	4	4	4	4	4	4	4	4	4	4
4	BICF2S23750880	10258203	1	1	1	1	1	1	1	1	1	1	1	1	1	1	1	1	1	1	1	1
4	BICF2P658089	10260624	2	2	2	2	2	2	2	2	2	2	2	2	2	2	2	2	2	2	2	2
4	BICF2S23226629	10271896	2	2	2	2	2	2	2	2	2	2	2	2	2	2	2	2	2	2	2	2
4	TIGRP2P58309_RS8594364	10291398	3	3	3	3	3	3	3	3	3	3	3	3	3	3	3	3	3	3	3	3
4	BICF2S22961334	10304118	3	3	3	3	3	3	3	3	3	3	3	3	3	3	3	3	3	3	3	3
4	BICF2S22961570	10308638	1	1	1	1	1	1	1	1	1	1	1	1	1	1	1	1	1	1	1	1
4	BICF2P562131	10328625	1	1	1	1	1	1	1	1	1	1	1	1	1	1	1	1	1	1	1	1
4	BICF2S23352500	10348766	1	1	1	1	1	1	1	1	1	1	1	1	1	1	1	1	1	1	1	1
4	BICF2P1202307	10355798	4	4	4	4	4	4	4	4	4	4	4	4	4	4	4	4	4	4	4	4
4	TIGRP2P58314_RS8690719	10378012	4	4	4	4	4	4	4	4	4	4	4	4	4	4	4	4	4	4	4	4
4	BICF2P1211698	10392008	4	4	4	4	4	4	4	4	4	4	4	4	4	4	4	4	4	4	4	4
4	CHR4_10395439	10395439	4	4	4	4	4	4	4	4	4	4	4	4	4	4	4	4	4	4	4	4
4	BICF2P198464	10404688	2	2	2	2	2	2	2	2	2	2	2	2	2	2	2	2	2	2	2	2
4	BICF2P755038	10413462	3	3	3	3	3	3	3	3	3	3	3	3	3	3	3	3	3	3	3	3
4	BICF2P270273	10422127	3	3	3	3	3	3	3	3	3	3	3	3	3	3	3	3	3	3	3	3
4	BICF2P955252	10437304	3	3	3	3	3	3	3	3	3	3	3	3	3	3	3	3	3	3	3	3
4	BICF2P261522	10461539	3	3	3	3	3	3	3	3	3	3	3	3	3	3	3	3	3	3	3	3
4	BICF2P1305957	10473708	2	2	2	2	2	2	2	2	2	2	2	2	2	2	2	2	2	2	2	2
4	G266F39S165	10494913	1	1	1	1	1	1	1	1	1	1	1	1	1	1	1	1	1	1	1	1
4	BICF2S23651667	10513168	3	3	3	3	3	3	3	3	3	3	3	3	3	3	3	3	3	3	3	3
4	BICF2P1397481	10521287	3	3	3	3	3	3	3	3	3	3	3	3	3	3	3	3	3	3	3	3
4	BICF2S23136829	10529645	3	3	3	3	3	3	3	3	3	3	3	3	3	3	3	3	3	3	3	3
4	BICF2P1355716	10541037	1	1	1	1	1	1	1	1	1	1	1	1	1	1	1	1	1	1	1	1
4	BICF2P576591	10552957	1	1	1	1	1	1	1	1	1	1	1	1	1	1	1	1	1	1	1	1
4	CHR4_10553857	10553857	2	2	2	2	2	2	2	2	2	2	2	2	2	2	2	2	2	2	2	2
4	BICF2P397201	10554990	2	2	2	2	2	2	2	2	2	2	2	2	2	2	2	2	2	2	2	2
4	BICF2P1161167	10568119	3	3	3	3	3	3	3	3	3	3	3	3	3	3	3	3	3	3	3	3
4	BICF2S22935331	10577360	4	4	4	4	4	4	4	4	4	4	4	4	4	4	4	4	4	4	4	4
4	BICF2S23511342	10591692	3	3	1	3	1	3	1	3	1	3	3	3	1	3	3	3	3	3	3	3
4	BICF2P209203	10598791	4	4	4	4	4	4	4	4	4	4	4	4	4	4	4	4	4	4	4	4
4	BICF2P547450	10609236	3	3	3	3	3	3	3	3	3	3	3	3	3	3	3	3	3	3	3	3
4	BICF2P1018694	10620643	3	3	3	3	3	3	3	3	3	3	3	3	3	3	3	3	3	3	3	3
4	BICF2P581335	10635236	2	2	2	2	2	2	2	2	2	2	2	2	2	2	2	2	2	2	2	2
4	TIGRP2P58412_RS8693234	10645340	4	4	4	4	4	4	4	4	4	4	4	4	4	4	4	4	4	4	4	4
4	TIGRP2P58420_RS9013995	10679635	4	4	4	4	4	4	4	4	4	4	4	4	4	4	4	4	4	4	4	4
4	BICF2P70710	10698839	3	3	3	3	3	3	3	3	3	3	3	3	3	3	3	3	3	3	3	3
4	BICF2P1316419	10701010	2	2	2	2	2	2	2	2	2	2	2	2	2	2	2	2	2	2	2	2
4	BICF2P164568	10715022	4	4	4	4	4	4	4	4	4	4	4	4	4	4	4	4	4	4	4	4
4	TIGRP2P58431_RS9200301	10729456	1	1	1	1	1	1	1	1	1	1	1	1	1	1	1	1	1	1	1	1
4	BICF2P647063	10737106	2	2	4	2	4	2	4	2	4	2	2	2	4	2	2	2	2	2	2	2
4	BICF2P563879	10747872	3	3	3	3	3	3	3	3	3	3	3	3	3	3	3	3	3	3	3	3
4	BICF2P120052	10769131	1	1	1	1	1	1	1	1	1	1	1	1	1	1	1	1	1	1	1	1
4	BICF2P603161	10803346	4	4	4	4	4	4	4	4	4	4	4	4	4	4	4	4	4	4	4	4
4	BICF2P230802	10805765	2	2	2	2	2	2	2	2	2	2	2	2	2	2	2	2	2	2	2	2
4	TIGRP2P58441_RS8727864	10827262	2	2	2	2	2	2	2	2	2	2	2	2	2	2	2	2	2	2	2	2
4	BICF2P632004	10828516	2	2	2	2	2	2	2	2	2	2	2	2	2	2	2	2	2	2	2	2
4	TIGRP2P58446_RS8797282	10847557	3	3	3	3	3	3	3	3	3	3	3	3	3	3	3	3	3	3	3	3
4	TIGRP2P58448_RS9141826	10855969	2	2	2	2	2	2	2	2	2	2	2	2	2	2	2	2	2	2	2	2
4	BICF2S23157379	10870306	1	1	1	1	1	1	1	1	1	1	1	1	1	1	1	1	1	1	1	1
4	BICF2P484959	10880486	4	4	4	4	4	4	4	4	4	4	4	4	4	4	4	4	4	4	4	4
4	BICF2P1038617	10888625	4	4	4	4	4	4	4	4	4	4	4	4	4	4	4	4	4	4	4	4
4	TIGRP2P58452_RS9081907	10907971	4	4	4	4	4	4	4	4	4	4	4	4	4	4	4	4	4	4	4	4
4	BICF2P1179952	10937366	4	4	2	4	2	4	2	4	2	4	4	4	2	4	4	4	4	4	4	4
4	BICF2P1178736	10943050	3	3	3	3	3	3	3	3	3	3	3	3	3	3	3	3	3	3	3	3
4	TIGRP2P58463_RS8969746	10956154	2	2	2	2	2	2	2	2	2	2	2	2	2	2	2	2	2	2	2	2
4	TIGRP2P58466_RS8518440	10975808	3	3	3	3	3	3	3	3	3	3	3	3	3	3	3	3	3	3	3	3
4	BICF2P962365	10983979	1	1	1	1	1	1	1	1	1	1	1	1	1	1	1	1	1	1	1	1
4	TIGRP2P58469_RS8927139	10999415	4	4	4	4	4	4	4	4	4	4	4	4	4	4	4	4	4	4	4	4
4	CHR4_11004301	11004301	3	3	3	3	3	3	3	3	3	3	3	3	3	3	3	3	3	3	3	3
4	CHR4_11006836	11006836	1	1	1	1	1	1	1	1	1	1	1	1	1	1	1	1	1	1	1	1
4	BICF2P667973	11008669	2	2	2	2	2	2	2	2	2	2	2	2	2	2	2	2	2	2	2	2
4	BICF2P1250275	11015005	2	2	2	2	2	2	2	2	2	2	2	2	2	2	2	2	2	2	2	2
4	TIGRP2P58472_RS8974232	11029099	2	2	4	2	4	2	4	2	4	2	2	2	4	2	2	2	2	2	2	2
4	BICF2P800812	11039487	1	1	4	1	4	1	4	1	4	1	1	1	4	1	1	1	1	1	1	1
4	TIGRP2P58485_RS8733408	11062222	4	4	4	4	4	4	4	4	4	4	4	4	4	4	4	4	4	4	4	4
4	BICF2S23736199	11086698	2	2	2	2	2	2	2	2	2	2	2	2	2	2	2	2	2	2	2	2
4	BICF2S22940205	11098201	2	2	4	2	4	2	4	2	4	2	2	2	4	2	2	2	2	2	2	2
4	BICF2P913864	11113063	1	1	3	1	3	1	3	1	3	1	1	1	3	1	1	1	1	1	1	1
4	TIGRP2P58503_RS8833448	11118877	2	2	2	2	2	2	2	2	2	2	2	2	2	2	2	2	2	2	2	2
4	BICF2P720506	11134978	1	1	1	1	1	1	1	1	1	1	1	1	1	1	1	1	1	1	1	1
4	TIGRP2P58504_RS8886755	11139517	2	2	2	2	2	2	2	2	2	2	2	2	2	2	2	2	2	2	2	2
4	TIGRP2P58514_RS8920091	11158435	1	1	1	1	1	1	1	1	1	1	1	1	1	1	1	1	1	1	1	1
4	BICF2P751629	11161945	1	1	1	1	1	1	1	1	1	1	1	1	1	1	1	1	1	1	1	1
4	BICF2S2314481	11184081	3	3	4	3	4	3	4	3	4	3	3	3	4	3	3	3	3	3	3	3
4	TIGRP2P58533_RS8773167	11201793	1	1	1	1	1	1	1	1	1	1	1	1	1	1	1	1	1	1	1	1
4	TIGRP2P58538_RS9028437	11207438	1	1	1	1	1	1	1	1	1	1	1	1	1	1	1	1	1	1	1	1
4	BICF2P440076	11224188	3	3	1	3	1	3	1	3	1	3	3	3	1	3	3	3	3	3	3	3
4	TIGRP2P58546_RS8539821	11231930	1	1	1	1	1	1	1	1	1	1	1	1	1	1	1	1	1	1	1	1
4	TIGRP2P58549_RS9037538	11246681	3	3	1	3	1	3	1	3	1	3	3	3	1	3	3	3	3	3	3	3
4	BICF2S23310890	11256833	2	2	4	2	4	2	4	2	4	2	2	2	4	2	2	2	2	2	2	2
4	BICF2S23348511	11267870	4	4	2	4	2	4	2	4	2	4	4	4	2	4	4	4	4	4	4	4
4	TIGRP2P58561_RS8906772	11276529	3	3	1	3	1	3	1	3	1	3	3	3	1	3	3	3	3	3	3	3
4	BICF2S2302064	11290096	3	3	1	3	1	3	1	3	1	3	3	3	1	3	3	3	3	3	3	3
4	BICF2P1254141	11305078	1	1	1	1	1	1	1	1	1	1	1	1	1	1	1	1	1	1	1	1
4	TIGRP2P58578_RS8669707	11317475	3	3	3	3	3	3	3	3	3	3	3	3	3	3	3	3	3	3	3	3
4	BICF2P646854	11328066	1	1	3	1	3	1	3	1	3	1	1	1	3	1	1	1	1	1	1	1
4	BICF2P295391	11334304	4	4	2	4	2	4	2	4	2	4	4	4	2	4	4	4	4	4	4	4
4	BICF2P295392	11334337	1	1	1	1	1	1	1	1	1	1	1	1	1	1	1	1	1	1	1	1
4	BICF2P1205051	11352322	4	4	1	4	1	4	1	4	1	4	4	4	1	4	4	4	4	4	4	4
4	TIGRP2P58588_RS8971630	11366784	2	2	4	2	4	2	4	2	4	2	2	2	4	2	2	2	2	2	2	2
4	BICF2P996657	11385759	1	1	2	1	2	1	2	1	2	1	1	1	2	1	1	1	1	1	1	1
4	BICF2S23453521	11390813	1	1	1	1	1	1	1	1	1	1	1	1	1	1	1	1	1	1	1	1
4	BICF2P619746	11407738	3	3	3	3	3	3	3	3	3	3	3	3	3	3	3	3	3	3	3	3
4	TIGRP2P58601_RS8913601	11415914	3	3	1	3	1	3	1	3	1	3	3	3	1	3	3	3	3	3	3	3
4	BICF2P786069	11434094	2	2	1	2	1	2	1	2	1	2	2	2	1	2	2	2	2	2	2	2
4	BICF2P775976	11442797	2	2	2	2	2	2	2	2	2	2	2	2	2	2	2	2	2	2	2	2
4	BICF2S23646789	11459387	4	4	4	4	4	4	4	4	4	4	4	4	4	4	4	4	4	4	4	4
4	CHR4_11460074	11460074	3	3	3	3	3	3	3	3	3	3	3	3	3	3	3	3	3	3	3	3
4	CHR4_11462148	11462148	5	5	5	5	5	5	5	5	5	5	5	5	5	5	5	5	5	5	5	5
4	BICF2P128198	11473420	3	3	3	3	3	3	3	3	3	3	3	3	3	3	3	3	3	3	3	3
4	BICF2P298648	11500275	4	4	2	4	2	4	2	4	2	4	4	4	2	4	4	4	4	4	4	4
4	BICF2S23253309	11535233	3	3	3	3	3	3	3	3	3	3	3	3	3	3	3	3	3	3	3	3
4	TIGRP2P58633_RS8752195	11544062	3	3	3	3	3	3	3	3	3	3	3	3	3	3	3	3	3	3	3	3
4	BICF2P213126	11553989	3	3	3	3	3	3	3	3	3	3	3	3	3	3	3	3	3	3	3	3
4	BICF2S2341401	11581629	3	3	3	3	3	3	3	3	3	3	3	3	3	3	3	3	3	3	3	3
4	BICF2P1020741	11591918	4	4	4	4	4	4	4	4	4	4	4	4	4	4	4	4	4	4	4	4
4	CHR4_11596222	11596222	2	2	2	2	2	2	2	2	2	2	2	2	2	2	2	2	2	2	2	2
4	BICF2P357299	11606445	4	4	4	4	4	4	4	4	4	4	4	4	4	4	4	4	4	4	4	4
4	BICF2P1398792	11614358	4	4	1	4	1	4	1	4	1	4	4	4	1	4	4	4	4	4	4	4
4	BICF2P940448	11639052	4	4	3	4	3	4	3	4	3	4	4	4	3	4	4	4	4	4	4	4
4	TIGRP2P58655_RS9062513	11645018	1	1	3	1	3	1	3	1	3	1	1	1	3	1	1	1	1	1	1	1
4	BICF2P1154529	11666545	1	1	2	1	2	1	2	1	2	1	1	1	2	1	1	1	1	1	1	1
4	BICF2P739745	11667642	1	1	3	1	3	1	3	1	3	1	1	1	3	1	1	1	1	1	1	1
4	TIGRP2P58668_RS9083935	11681081	1	1	1	1	1	1	1	1	1	1	1	1	1	1	1	1	1	1	1	1
4	BICF2P582317	11695273	1	1	3	1	3	1	3	1	3	1	1	1	3	1	1	1	1	1	1	1
4	BICF2P336676	11712183	3	3	3	3	3	3	3	3	3	3	3	3	3	3	3	3	3	3	3	3
4	BICF2S232319	11720998	1	1	3	1	3	1	3	1	3	1	1	1	3	1	1	1	1	1	1	1
4	TIGRP2P58684_RS8895095	11725929	3	3	3	3	3	3	3	3	3	3	3	3	3	3	3	3	3	3	3	3
4	TIGRP2P58695_RS8954991	11747868	2	2	4	2	4	2	4	2	4	2	2	2	4	2	2	2	2	2	2	2
4	BICF2S2411449	11768361	3	3	3	3	3	3	3	3	3	3	3	3	3	3	3	3	3	3	3	3
4	BICF2S23031685	11775871	2	2	2	2	2	2	2	2	2	2	2	2	2	2	2	2	2	2	2	2
4	TIGRP2P58708_RS8719613	11798507	1	1	1	1	1	1	1	1	1	1	1	1	1	1	1	1	1	1	1	1
4	BICF2P791573	11806264	1	1	1	1	1	1	1	1	1	1	1	1	1	1	1	1	1	1	1	1
4	BICF2P646266	11821997	1	1	1	1	1	1	1	1	1	1	1	1	1	1	1	1	1	1	1	1
4	BICF2P490686	11834703	1	1	1	1	1	1	1	1	1	1	1	1	1	1	1	1	1	1	1	1
4	BICF2S23629591	11842187	2	2	2	2	2	2	2	2	2	2	2	2	2	2	2	2	2	2	2	2
4	TIGRP2P58735_RS8849878	11862174	1	1	2	1	2	1	2	1	2	1	1	1	2	1	1	1	1	1	1	1
4	BICF2S23325886	11863768	3	3	1	3	1	3	1	3	1	3	3	3	1	3	3	3	3	3	3	3
4	CHR4_11864717	11864717	2	2	4	2	4	2	4	2	4	2	2	2	4	2	2	2	2	2	2	2
4	CHR4_11865354	11865354	2	2	2	2	2	2	2	2	2	2	2	2	2	2	2	2	2	2	2	2
4	BICF2S23323016	11867326	2	2	4	2	4	2	4	2	4	2	2	2	4	2	2	2	2	2	2	2
4	BICF2P158124	11885638	4	4	4	4	4	4	4	4	4	4	4	4	4	4	4	4	4	4	4	4
4	BICF2P1365912	11891464	3	3	3	3	3	3	3	3	3	3	3	3	3	3	3	3	3	3	3	3
4	BICF2P410926	11906819	3	3	3	3	3	3	3	3	3	3	3	3	3	3	3	3	3	3	3	3
4	BICF2P1079013	11910844	1	1	1	1	1	1	1	1	1	1	1	1	1	1	1	1	1	1	1	1
4	BICF2P447515	11925922	1	1	1	1	1	1	1	1	1	1	1	1	1	1	1	1	1	1	1	1
4	BICF2S23229343	11939089	1	1	3	1	3	1	3	1	3	1	1	1	3	1	1	1	1	1	1	1
4	BICF2S23640196	11958072	2	2	2	2	2	2	2	2	2	2	2	2	2	2	2	2	2	2	2	2
4	TIGRP2P58753_RS9084477	11971008	2	2	2	2	2	2	2	2	2	2	2	2	2	2	2	2	2	2	2	2
4	BICF2P1330950	11978206	1	1	1	1	1	1	1	1	1	1	1	1	1	1	1	1	1	1	1	1
4	TIGRP2P58767_RS8899314	11994478	1	1	1	1	1	1	1	1	1	1	1	1	1	1	1	1	1	1	1	1
4	BICF2P1085325	12008579	2	2	2	2	2	2	2	2	2	2	2	2	2	2	2	2	2	2	2	2
4	BICF2P209567	12036187	4	4	4	4	4	4	4	4	4	4	4	4	4	4	4	4	4	4	4	4
4	BICF2P286951	12054106	4	4	4	4	4	4	4	4	4	4	4	4	4	4	4	4	4	4	4	4
4	BICF2S23536281	12062001	3	3	3	3	3	3	3	3	3	3	3	3	3	3	3	3	3	3	3	3
4	BICF2S23647879	12070642	3	3	3	3	3	3	3	3	3	3	3	3	3	3	3	3	3	3	3	3
4	TIGRP2P58774_RS9036482	12081337	1	1	3	1	3	1	3	1	3	1	1	1	3	1	1	1	1	1	1	1
4	BICF2P280457	12095275	2	2	2	2	2	2	2	2	2	2	2	2	2	2	2	2	2	2	2	2
4	BICF2P688594	12110102	4	4	4	4	4	4	4	4	4	4	4	4	4	4	4	4	4	4	4	4
4	BICF2S23422957	12122979	3	3	3	3	3	3	3	3	3	3	3	3	3	3	3	3	3	3	3	3
4	BICF2S2321205	12136636	3	3	3	3	3	3	3	3	3	3	3	3	3	3	3	3	3	3	3	3
4	BICF2P881012	12151151	1	1	3	1	3	1	3	1	3	1	1	1	3	1	1	1	1	1	1	1
4	CHR4_12164500	12164500	4	4	2	4	2	4	2	4	2	4	4	4	2	4	4	4	4	4	4	4
4	CHR4_12164897	12164897	2	2	2	2	2	2	2	2	2	2	2	2	2	2	2	2	2	2	2	2
4	CHR4_12165565	12165565	1	1	2	1	2	1	2	1	2	1	1	1	2	1	1	1	1	1	1	1
4	BICF2P665452	12165698	1	1	1	1	1	1	1	1	1	1	1	1	1	1	1	1	1	1	1	1
4	CHR4_12166205	12166205	3	3	4	3	4	3	4	3	4	3	3	3	4	3	3	3	3	3	3	3
4	TIGRP2P58792_RS8808159	12169484	4	4	1	4	1	4	1	4	1	4	4	4	1	4	4	4	4	4	4	4
4	BICF2P1125744	12172511	0	0	1	3	0	0	0	0	0	0	3	3	0	0	0	0	3	3	0	0
4	BICF2P1125749	12173194	2	2	2	2	2	2	2	2	2	2	2	2	2	2	2	2	2	2	2	2
4	BICF2P741953	12194576	2	2	2	2	2	2	2	2	2	2	2	2	2	2	2	2	2	2	2	2
4	BICF2P271690	12198238	1	1	3	1	3	1	3	1	3	1	1	1	3	1	1	1	1	1	1	1
4	CHR4_12204524	12204524	2	2	2	2	2	2	2	2	2	2	2	2	2	2	2	2	2	2	2	2
4	CHR4_12204967	12204967	2	2	2	2	2	2	2	2	2	2	2	2	2	2	2	2	2	2	2	2
4	BICF2P987194	12205557	3	3	3	3	3	3	3	3	3	3	3	3	3	3	3	3	3	3	3	3
4	CHR4_12205976	12205976	3	3	3	3	3	3	3	3	3	3	3	3	3	3	3	3	3	3	3	3
4	CHR4_12206520	12206520	1	1	1	1	1	1	1	1	1	1	1	1	1	1	1	1	1	1	1	1
4	CHR4_12206782	12206782	3	3	1	3	1	3	1	3	1	3	3	3	1	3	3	3	3	3	3	3
4	CHR4_12206850	12206850	2	2	4	2	4	2	4	2	4	2	2	2	4	2	2	2	2	2	2	2
4	CHR4_12207106	12207106	1	1	1	1	1	1	1	1	1	1	1	1	1	1	1	1	1	1	1	1
4	CHR4_12209065	12209065	3	3	3	3	3	3	3	3	3	3	3	3	3	3	3	3	3	3	3	3
4	BICF2P1006455	12209712	4	4	4	4	4	4	4	4	4	4	4	4	4	4	4	4	4	4	4	4
4	BICF2P1006456	12209881	1	1	3	1	3	1	3	1	3	1	1	1	3	1	1	1	1	1	1	1
4	BICF2S23342719	12219227	2	2	2	2	2	2	2	2	2	2	2	2	2	2	2	2	2	2	2	2
4	CHR4_12220272	12220272	2	2	2	2	2	2	2	2	2	2	2	2	2	2	2	2	2	2	2	2
4	TIGRP2P58807_RS8659853	12231605	2	2	4	2	4	2	4	2	4	2	2	2	4	2	2	2	2	2	2	2
4	BICF2P879491	12253465	4	4	4	4	4	4	4	4	4	4	4	4	4	4	4	4	4	4	4	4
4	BICF2P98119	12255086	3	3	1	3	1	3	1	3	1	3	3	3	1	3	3	3	3	3	3	3
4	BICF2P81832	12269143	2	2	2	2	2	2	2	2	2	2	2	2	2	2	2	2	2	2	2	2
4	TIGRP2P58813_RS9066941	12279775	2	2	2	2	2	2	2	2	2	2	2	2	2	2	2	2	2	2	2	2
4	BICF2P977759	12288912	4	4	4	4	4	4	4	4	4	4	4	4	4	4	4	4	4	4	4	4
4	BICF2P763418	12299939	3	3	3	3	3	3	3	3	3	3	3	3	3	3	3	3	3	3	3	3
4	BICF2S23653908	12312177	2	2	2	2	2	2	2	2	2	2	2	2	2	2	2	2	2	2	2	2
4	BICF2P372245	12324634	1	1	1	1	1	1	1	1	1	1	1	1	1	1	1	1	1	1	1	1
4	BICF2S23057666	12341719	3	3	3	3	3	3	3	3	3	3	3	3	3	3	3	3	3	3	3	3
4	BICF2S23515830	12346912	3	3	3	3	3	3	3	3	3	3	3	3	3	3	3	3	3	3	3	3
4	BICF2P220356	12363733	1	1	1	1	1	1	1	1	1	1	1	1	1	1	1	1	1	1	1	1
4	BICF2S23513308	12371982	2	2	4	2	4	2	4	2	4	2	2	2	4	2	2	2	2	2	2	2
4	BICF2P550231	12386936	3	3	1	3	1	3	1	3	1	3	3	3	1	3	3	3	3	3	3	3
4	BICF2P253062	12399437	4	4	4	4	4	4	4	4	4	4	4	4	4	4	4	4	4	4	4	4
4	BICF2S2355646	12405198	4	4	2	4	2	4	2	4	2	4	4	4	2	4	4	4	4	4	4	4
4	BICF2P904279	12415121	4	4	2	4	2	4	2	4	2	4	4	4	2	4	4	4	4	4	4	4
4	BICF2S23230859	12434113	4	4	4	4	4	4	4	4	4	4	4	4	4	4	4	4	4	4	4	4
4	BICF2P542827	12443553	3	3	3	3	3	3	3	3	3	3	3	3	3	3	3	3	3	3	3	3
4	BICF2S23143729	12460182	3	3	3	3	3	3	3	3	3	3	3	3	3	3	3	3	3	3	3	3
4	TIGRP2P58861_RS9209334	12471693	4	4	4	4	4	4	4	4	4	4	4	4	4	4	4	4	4	4	4	4
4	BICF2P185546	12475372	2	2	2	2	2	2	2	2	2	2	2	2	2	2	2	2	2	2	2	2
4	BICF2P866084	12486465	2	2	2	2	2	2	2	2	2	2	2	2	2	2	2	2	2	2	2	2
4	CHR4_12492447	12492447	2	2	2	2	2	2	2	2	2	2	2	2	2	2	2	2	2	2	2	2
4	CHR4_12492667	12492667	2	2	2	2	2	2	2	2	2	2	2	2	2	2	2	2	2	2	2	2
4	BICF2P1404784	12500794	4	4	2	4	2	4	2	4	2	4	4	4	2	4	4	4	4	4	4	4
4	TIGRP2P58887_RS9159379	12514521	1	1	1	1	1	1	1	1	1	1	1	1	1	1	1	1	1	1	1	1
4	TIGRP2P58888_RS9191779	12519645	4	4	4	4	4	4	4	4	4	4	4	4	4	4	4	4	4	4	4	4
4	BICF2P622190	12531295	3	3	3	3	3	3	3	3	3	3	3	3	3	3	3	3	3	3	3	3
4	TIGRP2P58893_RS9244440	12544587	3	3	3	3	3	3	3	3	3	3	3	3	3	3	3	3	3	3	3	3
4	BICF2P771377	12551450	1	1	1	1	1	1	1	1	1	1	1	1	1	1	1	1	1	1	1	1
4	BICF2P771374	12552241	4	4	4	4	4	4	4	4	4	4	4	4	4	4	4	4	4	4	4	4
4	BICF2S23129801	12552921	1	1	1	1	1	1	1	1	1	1	1	1	1	1	1	1	1	1	1	1
4	BICF2P1090418	12558317	4	4	4	4	4	4	4	4	4	4	4	4	4	4	4	4	4	4	4	4
4	BICF2P812066	12563647	3	3	3	3	3	3	3	3	3	3	3	3	3	3	3	3	3	3	3	3
4	BICF2S23538004	12581257	1	1	1	1	1	1	1	1	1	1	1	1	1	1	1	1	1	1	1	1
4	BICF2P937273	12595829	2	2	2	2	2	2	2	2	2	2	2	2	2	2	2	2	2	2	2	2
4	BICF2P758190	12599251	4	4	2	4	2	4	2	4	2	4	4	4	2	4	4	4	4	4	4	4
4	BICF2S2331540	12608719	3	3	3	3	3	3	3	3	3	3	3	3	3	3	3	3	3	3	3	3
4	BICF2P1216119	12619805	1	1	1	1	1	1	1	1	1	1	1	1	1	1	1	1	1	1	1	1
4	BICF2P1458361	12636590	3	3	3	3	3	3	3	3	3	3	3	3	3	3	3	3	3	3	3	3
4	BICF2P582832	12645465	2	2	2	2	2	2	2	2	2	2	2	2	2	2	2	2	2	2	2	2
4	BICF2P887166	12655568	3	3	3	3	3	3	3	3	3	3	3	3	3	3	3	3	3	3	3	3
4	BICF2P482056	12666784	4	4	4	4	4	4	4	4	4	4	4	4	4	4	4	4	4	4	4	4
4	BICF2P379964	12671453	1	1	1	1	1	1	1	1	1	1	1	1	1	1	1	1	1	1	1	1
4	TIGRP2P58915_RS8690006	12679770	3	3	3	3	3	3	3	3	3	3	3	3	3	3	3	3	3	3	3	3
4	TIGRP2P58919_RS8746721	12688484	1	1	3	1	3	1	3	1	3	1	1	1	3	1	1	1	1	1	1	1
4	TIGRP2P58921_RS8902851	12705169	4	4	3	4	3	4	3	4	3	4	4	4	3	4	4	4	4	4	4	4
4	BICF2P1147305	12719155	1	1	3	1	3	1	3	1	3	1	1	1	3	1	1	1	1	1	1	1
4	BICF2S23620838	12722918	4	4	2	4	2	4	2	4	2	4	4	4	2	4	4	4	4	4	4	4
4	BICF2P383923	12745528	1	1	1	1	1	1	1	1	1	1	1	1	1	1	1	1	1	1	1	1
4	BICF2P673456	12748044	1	1	3	1	3	1	3	1	3	1	1	1	3	1	1	1	1	1	1	1
4	TIGRP2P58943_RS8992294	12763345	3	3	1	3	1	3	1	3	1	3	3	3	1	3	3	3	3	3	3	3
4	BICF2S23311792	12769277	2	2	1	2	1	2	1	2	1	2	2	2	1	2	2	2	2	2	2	2
4	BICF2P1284144	12780674	4	4	1	4	1	4	1	4	1	4	4	4	1	4	4	4	4	4	4	4
4	BICF2P166307	12793951	4	4	4	4	4	4	4	4	4	4	4	4	4	4	4	4	4	4	4	4
4	BICF2P1008784	12812979	2	2	2	2	2	2	2	2	2	2	2	2	2	2	2	2	2	2	2	2
4	TIGRP2P58960_RS9214185	12822849	3	3	3	3	3	3	3	3	3	3	3	3	3	3	3	3	3	3	3	3
4	BICF2P955873	12829933	3	3	3	3	3	3	3	3	3	3	3	3	3	3	3	3	3	3	3	3
4	BICF2P127668	12838508	1	1	1	1	1	1	1	1	1	1	1	1	1	1	1	1	1	1	1	1
4	TIGRP2P58961_RS8950477	12854534	1	1	3	1	3	1	3	1	3	1	1	1	3	1	1	1	1	1	1	1
4	BICF2P204339	12860671	2	2	2	2	2	2	2	2	2	2	2	2	2	2	2	2	2	2	2	2
4	BICF2P523932	12880667	4	4	4	4	4	4	4	4	4	4	4	4	4	4	4	4	4	4	4	4
4	BICF2S23527842	12885610	4	4	4	4	4	4	4	4	4	4	4	4	4	4	4	4	4	4	4	4
4	BICF2S23061095	12894519	4	4	4	4	4	4	4	4	4	4	4	4	4	4	4	4	4	4	4	4
4	BICF2P806570	12912547	1	1	1	1	1	1	1	1	1	1	1	1	1	1	1	1	1	1	1	1
4	TIGRP2P58966_RS8892924	12912730	1	1	1	1	1	1	1	1	1	1	1	1	1	1	1	1	1	1	1	1
4	BICF2P159526	12921287	3	3	3	3	3	3	3	3	3	3	3	3	3	3	3	3	3	3	3	3
4	TIGRP2P58972_RS9167978	12936699	4	4	2	4	2	4	2	4	2	4	4	4	2	4	4	4	4	4	4	4
4	BICF2P867489	12942938	2	2	4	2	4	2	4	2	4	2	2	2	4	2	2	2	2	2	2	2
4	BICF2P1165284	12952346	4	4	2	4	2	4	2	4	2	4	4	4	2	4	4	4	4	4	4	4
4	BICF2P585761	12971020	4	4	4	4	4	4	4	4	4	4	4	4	4	4	4	4	4	4	4	4
4	BICF2S2324982	12984659	4	4	4	4	4	4	4	4	4	4	4	4	4	4	4	4	4	4	4	4
4	BICF2S23012274	12988799	1	1	1	1	1	1	1	1	1	1	1	1	1	1	1	1	1	1	1	1
4	BICF2P108834	12993338	1	1	1	1	1	1	1	1	1	1	1	1	1	1	1	1	1	1	1	1
4	BICF2P597047	13001395	4	4	4	4	4	4	4	4	4	4	4	4	4	4	4	4	4	4	4	4
4	BICF2P263428	13004467	4	4	4	4	4	4	4	4	4	4	4	4	4	4	4	4	4	4	4	4
4	BICF2P1175421	13019324	3	3	3	3	3	3	3	3	3	3	3	3	3	3	3	3	3	3	3	3
4	BICF2P1237201	13030874	1	1	1	1	1	1	1	1	1	1	1	1	1	1	1	1	1	1	1	1
4	TIGRP2P58986_RS9148747	13032743	1	1	4	1	4	1	4	1	4	1	1	1	4	1	1	1	1	1	1	1
4	BICF2P107734	13053796	2	2	2	2	2	2	2	2	2	2	2	2	2	2	2	2	2	2	2	2
4	BICF2P764191	13066289	3	3	3	3	3	3	3	3	3	3	3	3	3	3	3	3	3	3	3	3
4	BICF2S23628905	13069615	4	4	4	4	4	4	4	4	4	4	4	4	4	4	4	4	4	4	4	4
4	BICF2P280075	13082490	4	4	4	4	4	4	4	4	4	4	4	4	4	4	4	4	4	4	4	4
4	BICF2S23731406	13100688	2	4	4	4	2	4	2	4	2	4	2	4	4	4	4	4	4	4	4	4
4	BICF2P533809	13107399	1	2	2	2	1	2	1	2	1	2	1	2	2	2	2	2	2	2	2	2
4	TIGRP2P58995_RS9114611	13115566	2	4	4	4	2	4	2	4	2	4	2	4	4	4	4	4	4	4	4	4
4	BICF2P221963	13142071	3	3	3	3	3	3	3	3	3	3	3	3	3	3	3	3	3	3	3	3
4	CHR4_13152558	13152558	2	2	2	2	2	2	2	2	2	2	2	2	2	2	2	2	2	2	2	2
4	CHR4_13163051	13163051	2	2	2	2	2	2	2	2	2	2	2	2	2	2	2	2	2	2	2	2
4	CHR4_13170577	13170577	2	1	2	1	1	1	1	1	1	1	2	1	2	1	2	2	2	2	2	2
4	CHR4_13180254	13180254	1	3	1	3	3	3	3	3	3	3	1	3	1	3	1	1	1	1	1	1
4	CHR4_13206891	13206891	1	1	1	1	1	1	1	1	1	1	1	1	1	1	1	1	1	1	1	1
4	CHR4_13210996	13210996	1	3	1	3	1	1	1	1	1	1	1	3	1	3	3	3	3	3	3	3
4	G267F41S345	13222945	2	2	2	2	2	2	2	2	2	2	2	2	2	2	2	2	2	2	2	2
4	BICF2P447280	13246804	2	2	2	2	2	2	2	2	2	2	2	2	2	2	2	2	2	2	2	2
4	BICF2P434783	13258215	1	1	1	1	1	1	1	1	1	1	1	1	1	1	1	1	1	1	1	1
4	BICF2P38395	13271320	2	2	2	2	2	2	2	2	2	2	2	2	2	2	2	2	2	2	2	2
4	BICF2P148215	13275646	1	1	1	1	1	1	1	1	1	1	1	1	1	1	1	1	1	1	1	1
4	CHR4_13296254	13296254	4	3	4	3	3	3	3	3	3	3	4	3	4	3	4	4	4	4	4	4
4	BICF2P136300	13307356	2	2	2	2	2	2	2	2	2	2	2	2	2	2	2	2	2	2	2	2
4	CHR4_13311124	13311124	3	3	3	3	3	3	3	3	3	3	3	3	3	3	3	3	3	3	3	3
4	CHR4_13325484	13325484	3	1	3	1	1	1	1	1	1	1	3	1	3	1	3	3	3	3	3	3
4	CHR4_13332857	13332857	3	1	3	1	1	1	1	1	1	1	3	1	3	1	3	3	3	3	3	3
4	CHR4_13336199	13336199	3	1	3	1	1	1	1	1	1	1	3	1	3	1	3	3	3	3	3	3
4	CHR4_13347821	13347821	2	4	2	4	4	4	4	4	4	4	2	4	2	4	2	2	2	2	2	2
4	TIGRP2P59002_RS8946848	13352066	2	2	2	2	2	2	2	2	2	2	2	2	2	2	2	2	2	2	2	2
4	CHR4_13359291	13359291	4	2	4	2	2	2	2	2	2	2	4	2	4	2	4	4	4	4	4	4
4	CHR4_13363426	13363426	2	1	2	1	1	1	1	1	1	1	2	1	2	1	2	2	2	2	2	2
4	BICF2P1015090	13382780	2	2	2	2	2	2	2	2	2	2	2	2	2	2	2	2	2	2	2	2
4	CHR4_13386120	13386120	3	3	3	3	3	3	3	3	3	3	3	3	3	3	3	3	3	3	3	3
4	BICF2P193439	13396566	1	1	1	1	1	1	1	1	1	1	1	1	1	1	1	1	1	1	1	1
4	CHR4_13397432	13397432	2	1	2	1	1	1	1	1	1	1	2	1	2	1	2	2	2	2	2	2
4	BICF2S22916105	13404575	2	4	2	4	4	4	4	4	4	4	2	4	2	4	2	2	2	2	2	2
4	BICF2S2329142	13421196	1	1	4	1	4	1	4	1	4	1	1	1	4	1	1	1	1	1	1	1
4	BICF2P517667	13442272	1	1	1	1	1	1	1	1	1	1	1	1	1	1	1	1	1	1	1	1
4	BICF2P378112	13453406	2	2	2	2	2	2	2	2	2	2	2	2	2	2	2	2	2	2	2	2
4	CHR4_13460695	13460695	4	2	4	2	2	2	2	2	2	2	4	2	4	2	4	4	4	4	4	4
4	CHR4_13461062	13461062	2	4	2	4	4	4	4	4	4	4	2	4	2	4	2	2	2	2	2	2
4	CHR4_13462954	13462954	4	4	4	4	4	4	4	4	4	4	4	4	4	4	4	4	4	4	4	4
4	CHR4_13463599	13463599	1	1	1	1	1	1	1	1	1	1	1	1	1	1	1	1	1	1	1	1
4	CHR4_13463823	13463823	3	3	3	3	3	3	3	3	3	3	3	3	3	3	3	3	3	3	3	3
4	CHR4_13464434	13464434	4	2	2	2	4	2	4	2	4	2	4	2	2	2	2	2	2	2	2	2
4	BICF2P153438	13467257	3	1	1	1	3	1	3	1	3	1	3	1	1	1	1	1	1	1	1	1
4	BICF2P812212	13473568	3	2	2	2	3	2	3	2	3	2	3	2	2	2	2	2	2	2	2	2
4	BICF2P1032559	13498544	4	2	2	2	4	2	4	2	4	2	4	2	2	2	2	2	2	2	2	2
4	CHR4_13509104	13509104	3	3	3	3	3	3	3	3	3	3	3	3	3	3	3	3	3	3	3	3
4	BICF2S23623500	13512249	1	1	1	1	1	1	1	1	1	1	1	1	1	1	1	1	1	1	1	1
4	BICF2P1041620	13519314	4	4	4	4	4	4	4	4	4	4	4	4	4	4	4	4	4	4	4	4
4	BICF2P804617	13527230	4	4	4	4	4	4	4	4	4	4	4	4	4	4	4	4	4	4	4	4
4	G269F38S143	13554243	2	2	2	2	2	2	2	2	2	2	2	2	2	2	2	2	2	2	2	2
4	BICF2P1399395	13576114	1	1	1	1	1	1	1	1	1	1	1	1	1	1	1	1	1	1	1	1
4	BICF2P722146	13593394	1	1	1	1	1	1	1	1	1	1	1	1	1	1	1	1	1	1	1	1
4	BICF2P345583	13613544	4	4	4	4	4	4	4	4	4	4	4	4	4	4	4	4	4	4	4	4
4	BICF2S23153354	13622775	3	3	3	3	3	3	3	3	3	3	3	3	3	3	3	3	3	3	3	3
4	BICF2S23128138	13637592	3	3	3	3	3	3	3	3	3	3	3	3	3	3	3	3	3	3	3	3
4	BICF2P246888	13652646	3	3	3	3	3	3	3	3	3	3	3	3	3	3	3	3	3	3	3	3
4	BICF2S23534057	13667550	2	2	2	2	2	2	2	2	2	2	2	2	2	2	2	2	2	2	2	2
4	G270F55S198	13695307	4	2	4	2	4	4	4	4	4	4	4	2	4	2	2	2	2	2	2	2
4	BICF2S23736376	13725636	4	2	4	2	4	4	4	4	4	4	4	2	4	2	2	2	2	2	2	2
4	CHR4_13734071	13734071	2	4	2	4	2	2	2	2	2	2	2	4	2	4	4	4	4	4	4	4
4	BICF2P851916	13745518	1	1	1	1	1	1	1	1	1	1	1	1	1	1	1	1	1	1	1	1
4	CHR4_13745544	13745544	2	4	2	4	2	2	2	2	2	2	2	4	2	4	4	4	4	4	4	4
4	CHR4_13756253	13756253	1	1	3	1	3	1	3	1	3	1	1	1	3	1	1	1	1	1	1	1
4	CHR4_13766989	13766989	4	4	2	4	2	4	2	4	2	4	4	4	2	4	4	4	4	4	4	4
4	BICF2P160817	13772523	2	2	2	2	2	2	2	2	2	2	2	2	2	2	2	2	2	2	2	2
4	CHR4_13780883	13780883	4	4	4	4	4	4	4	4	4	4	4	4	4	4	4	4	4	4	4	4
4	BICF2S23034244	13790420	4	2	4	2	4	4	4	4	4	4	4	2	4	2	2	2	2	2	2	2
4	CHR4_13803057	13803057	3	3	3	3	3	3	3	3	3	3	3	3	3	3	3	3	3	3	3	3
4	CHR4_13803445	13803445	3	3	3	3	3	3	3	3	3	3	3	3	3	3	3	3	3	3	3	3
4	BICF2P1128476	13808145	1	1	1	1	1	1	1	1	1	1	1	1	1	1	1	1	1	1	1	1
4	BICF2P317452	13815529	2	2	2	2	2	2	2	2	2	2	2	2	2	2	2	2	2	2	2	2
4	BICF2P762492	13826173	4	4	4	4	4	4	4	4	4	4	4	4	4	4	4	4	4	4	4	4
4	BICF2S23646135	13853984	2	4	4	4	2	4	2	4	2	4	2	4	4	4	4	4	4	4	4	4
4	BICF2S23314569	13868992	3	3	3	3	3	3	3	3	3	3	3	3	3	3	3	3	3	3	3	3
4	BICF2P303360	13892395	2	2	2	2	2	2	2	2	2	2	2	2	2	2	2	2	2	2	2	2
4	BICF2S23041813	13924069	3	1	3	1	1	1	1	1	1	1	3	1	3	1	3	3	3	3	3	3
4	CHR4_13926517	13926517	3	1	1	1	3	1	3	1	3	1	3	1	1	1	1	1	1	1	1	1
4	CHR4_13926791	13926791	2	2	2	2	2	2	2	2	2	2	2	2	2	2	2	2	2	2	2	2
4	CHR4_13926840	13926840	3	3	3	3	3	3	3	3	3	3	3	3	3	3	3	3	3	3	3	3
4	BICF2P461505	13938603	2	2	2	2	2	2	2	2	2	2	2	2	2	2	2	2	2	2	2	2
4	BICF2P665028	13947812	3	3	1	3	1	3	1	3	1	3	3	3	1	3	3	3	3	3	3	3
4	BICF2P116712	13959308	3	3	3	3	3	3	3	3	3	3	3	3	3	3	3	3	3	3	3	3
4	BICF2P321212	13964771	4	4	3	4	3	4	3	4	3	4	4	4	3	4	4	4	4	4	4	4
4	BICF2P462462	13976538	2	2	4	2	4	2	4	2	4	2	2	2	4	2	2	2	2	2	2	2
4	BICF2P379821	13997055	1	1	1	1	1	1	1	1	1	1	1	1	1	1	1	1	1	1	1	1
4	BICF2P211298	14014335	3	3	1	3	1	3	1	3	1	3	3	3	1	3	3	3	3	3	3	3
4	BICF2P1252604	14022139	1	3	3	3	1	3	1	3	1	3	1	3	3	3	3	3	3	3	3	3
4	BICF2S23247944	14035192	2	2	4	2	4	2	4	2	4	2	2	2	4	2	2	2	2	2	2	2
4	BICF2P373715	14050901	1	1	1	1	1	1	1	1	1	1	1	1	1	1	1	1	1	1	1	1
4	BICF2P1423825	14061119	1	3	1	3	3	3	3	3	3	3	1	3	1	3	1	1	1	1	1	1
4	BICF2P1341765	14066776	4	3	4	3	3	3	3	3	3	3	4	3	4	3	4	4	4	4	4	4
4	BICF2P374480	14072731	2	2	2	2	2	2	2	2	2	2	2	2	2	2	2	2	2	2	2	2
4	BICF2P1188704	14085636	1	1	1	1	1	1	1	1	1	1	1	1	1	1	1	1	1	1	1	1
4	BICF2P778952	14086407	4	4	4	4	4	4	4	4	4	4	4	4	4	4	4	4	4	4	4	4
4	BICF2P1011170	14090282	1	1	1	1	1	1	1	1	1	1	1	1	1	1	1	1	1	1	1	1
4	CHR4_14099783	14099783	2	4	4	4	2	4	2	4	2	4	2	4	4	4	4	4	4	4	4	4
4	CHR4_14099833	14099833	1	3	3	3	1	3	1	3	1	3	1	3	3	3	3	3	3	3	3	3
4	CHR4_14100037	14100037	3	3	3	3	3	3	3	3	3	3	3	3	3	3	3	3	3	3	3	3
4	BICF2S23024884	14104488	1	3	3	3	1	3	1	3	1	3	1	3	3	3	3	3	3	3	3	3
4	BICF2S23658201	14117738	1	1	1	1	1	1	1	1	1	1	1	1	1	1	1	1	1	1	1	1
4	BICF2P1326953	14131257	2	2	2	2	2	2	2	2	2	2	2	2	2	2	2	2	2	2	2	2
4	BICF2P1013502	14139576	3	3	3	3	3	3	3	3	3	3	3	3	3	3	3	3	3	3	3	3
4	BICF2P570399	14162374	1	1	1	1	1	1	1	1	1	1	1	1	1	1	1	1	1	1	1	1
4	CHR4_14163998	14163998	2	4	4	4	2	4	2	4	2	4	2	4	4	4	4	4	4	4	4	4
4	CHR4_14164175	14164175	2	2	2	2	2	2	2	2	2	2	2	2	2	2	2	2	2	2	2	2
4	CHR4_14166208	14166208	1	2	2	2	1	2	1	2	1	2	1	2	2	2	2	2	2	2	2	2
4	BICF2S23229574	14176351	4	4	4	4	4	4	4	4	4	4	4	4	4	4	4	4	4	4	4	4
4	BICF2S245478	14189179	2	2	2	2	2	2	2	2	2	2	2	2	2	2	2	2	2	2	2	2
4	BICF2S2354902	14199196	3	3	3	3	3	3	3	3	3	3	3	3	3	3	3	3	3	3	3	3
4	BICF2P82857	14218082	4	4	4	4	4	4	4	4	4	4	4	4	4	4	4	4	4	4	4	4
4	BICF2S23518711	14237413	1	1	1	1	1	1	1	1	1	1	1	1	1	1	1	1	1	1	1	1
4	BICF2S22916430	14245635	3	3	1	3	1	3	1	3	1	3	3	3	1	3	3	3	3	3	3	3
4	BICF2P188554	14262627	4	4	4	4	4	4	4	4	4	4	4	4	4	4	4	4	4	4	4	4
4	BICF2P1150345	14294449	1	1	1	1	1	1	1	1	1	1	1	1	1	1	1	1	1	1	1	1
4	BICF2P200292	14305499	1	1	3	1	3	1	3	1	3	1	1	1	3	1	1	1	1	1	1	1
4	CHR4_14311739	14311739	4	4	4	4	4	4	4	4	4	4	4	4	4	4	4	4	4	4	4	4
4	BICF2S2368892	14313130	3	3	3	3	3	3	3	3	3	3	3	3	3	3	3	3	3	3	3	3
4	CHR4_14331607	14331607	1	1	1	1	1	1	1	1	1	1	1	1	1	1	1	1	1	1	1	1
4	CHR4_14332420	14332420	4	4	4	4	4	4	4	4	4	4	4	4	4	4	4	4	4	4	4	4
4	BICF2P584962	14332927	2	2	2	2	2	2	2	2	2	2	2	2	2	2	2	2	2	2	2	2
4	BICF2S2363081	14359683	3	3	3	3	3	3	3	3	3	3	3	3	3	3	3	3	3	3	3	3
4	BICF2P714236	14397777	2	2	2	2	2	2	2	2	2	2	2	2	2	2	2	2	2	2	2	2
4	CHR4_14409250	14409250	3	1	3	1	1	1	1	1	1	1	3	1	3	1	3	3	3	3	3	3
4	CHR4_14421521	14421521	2	4	2	4	4	4	4	4	4	4	2	4	2	4	2	2	2	2	2	2
4	BICF2P688090	14424110	3	3	3	3	3	3	3	3	3	3	3	3	3	3	3	3	3	3	3	3
4	CHR4_14435498	14435498	3	3	3	3	3	3	3	3	3	3	3	3	3	3	3	3	3	3	3	3
4	BICF2S23554537	14444463	3	1	3	1	3	3	3	3	3	3	3	1	3	1	1	1	1	1	1	1
4	BICF2P592679	14449879	2	2	2	2	2	2	2	2	2	2	2	2	2	2	2	2	2	2	2	2
4	BICF2S23542408	14460612	2	4	2	4	2	2	2	2	2	2	2	4	2	4	4	4	4	4	4	4
4	TIGRP2P59032_RS9246823	14479526	3	3	3	3	3	3	3	3	3	3	3	3	3	3	3	3	3	3	3	3
4	BICF2P567202	14503765	2	3	2	3	2	2	2	2	2	2	2	3	2	3	3	3	3	3	3	3
4	CHR4_14521358	14521358	1	3	1	3	1	1	1	1	1	1	1	3	1	3	3	3	3	3	3	3
4	CHR4_14532565	14532565	1	1	1	1	1	1	1	1	1	1	1	1	1	1	1	1	1	1	1	1
4	TIGRP2P59033_RS9077658	14534314	2	2	2	2	2	2	2	2	2	2	2	2	2	2	2	2	2	2	2	2
4	CHR4_14540034	14540034	4	4	4	4	4	4	4	4	4	4	4	4	4	4	4	4	4	4	4	4
4	BICF2P300840	14571732	1	1	1	1	1	1	1	1	1	1	1	1	1	1	1	1	1	1	1	1
4	BICF2S2327542	14577608	4	4	4	4	4	4	4	4	4	4	4	4	4	4	4	4	4	4	4	4
4	G272F42S153	14601851	2	2	2	2	2	2	2	2	2	2	2	2	2	2	2	2	2	2	2	2
4	BICF2P755516	14625821	3	3	3	3	3	3	3	3	3	3	3	3	3	3	3	3	3	3	3	3
4	BICF2P1153666	14635904	2	2	2	2	2	2	2	2	2	2	2	2	2	2	2	2	2	2	2	2
4	BICF2P1171776	14636139	3	3	3	3	3	3	3	3	3	3	3	3	3	3	3	3	3	3	3	3
4	BICF2P748651	14642174	3	3	3	3	3	3	3	3	3	3	3	3	3	3	3	3	3	3	3	3
4	TIGRP2P59037_RS8513122	14654259	3	3	3	3	3	3	3	3	3	3	3	3	3	3	3	3	3	3	3	3
4	BICF2P926170	14666676	3	3	3	3	3	3	3	3	3	3	3	3	3	3	3	3	3	3	3	3
4	BICF2P1471441	14679700	2	2	2	2	2	2	2	2	2	2	2	2	2	2	2	2	2	2	2	2
4	TIGRP2P59039_RS8813146	14690672	2	2	2	2	2	2	2	2	2	2	2	2	2	2	2	2	2	2	2	2
4	BICF2P842858	14706038	3	3	3	3	3	3	3	3	3	3	3	3	3	3	3	3	3	3	3	3
4	BICF2P171797	14720768	4	2	2	2	4	2	4	2	4	2	4	2	2	2	2	2	2	2	2	2
4	BICF2P433652	14736806	1	3	3	3	1	3	1	3	1	3	1	3	3	3	3	3	3	3	3	3
4	BICF2P912139	14748476	2	4	4	4	2	4	2	4	2	4	2	4	4	4	4	4	4	4	4	4
4	BICF2S2411431	14766903	1	3	3	3	1	3	1	3	1	3	1	3	3	3	3	3	3	3	3	3
4	BICF2P743199	14779794	3	3	3	3	3	3	3	3	3	3	3	3	3	3	3	3	3	3	3	3
4	BICF2P821698	14788701	3	4	4	4	3	4	3	4	3	4	3	4	4	4	4	4	4	4	4	4
4	BICF2S23118246	14799432	1	1	1	1	1	1	1	1	1	1	1	1	1	1	1	1	1	1	1	1
4	BICF2P680969	14805384	4	2	2	2	4	2	4	2	4	2	4	2	2	2	2	2	2	2	2	2
4	BICF2P666421	14818011	3	3	3	3	3	3	3	3	3	3	3	3	3	3	3	3	3	3	3	3
4	BICF2P1089755	14836490	1	3	3	3	1	3	1	3	1	3	1	3	3	3	3	3	3	3	3	3
4	BICF2P1036659	14844215	3	3	3	3	3	3	3	3	3	3	3	3	3	3	3	3	3	3	3	3
4	BICF2P738064	14852851	3	1	1	1	3	1	3	1	3	1	3	1	1	1	1	1	1	1	1	1
4	BICF2S2302085	14861546	1	3	3	3	1	3	1	3	1	3	1	3	3	3	3	3	3	3	3	3
4	BICF2P1201460	14877188	1	1	1	1	1	1	1	1	1	1	1	1	1	1	1	1	1	1	1	1
4	BICF2P618476	14894646	2	2	2	2	2	2	2	2	2	2	2	2	2	2	2	2	2	2	2	2
4	BICF2P924260	14901780	3	3	3	3	3	3	3	3	3	3	3	3	3	3	3	3	3	3	3	3
4	BICF2S232671	14914344	3	4	4	4	3	4	3	4	3	4	3	4	4	4	4	4	4	4	4	4
4	BICF2S23216061	14920136	3	3	3	3	3	3	3	3	3	3	3	3	3	3	3	3	3	3	3	3
4	BICF2S23312021	14955570	4	4	4	4	4	4	4	4	4	4	4	4	4	4	4	4	4	4	4	4
4	CHR4_14990951	14990952	5	6	6	6	5	6	5	6	5	6	5	6	6	6	6	6	6	6	6	6
4	CHR4_14991747	14991747	3	1	1	1	3	1	3	1	3	1	3	1	1	1	1	1	1	1	1	1
4	CHR4_14992457	14992457	1	3	3	3	1	3	1	3	1	3	1	3	3	3	3	3	3	3	3	3
4	CHR4_14992824	14992824	1	3	3	3	1	3	1	3	1	3	1	3	3	3	3	3	3	3	3	3
4	BICF2S2308480	14994755	1	2	2	2	1	2	1	2	1	2	1	2	2	2	2	2	2	2	2	2
4	BICF2P828367	15003937	3	3	3	3	3	3	3	3	3	3	3	3	3	3	3	3	3	3	3	3
4	CHR4_15029907	15029907	4	4	4	4	4	4	4	4	4	4	4	4	4	4	4	4	4	4	4	4
4	BICF2P689706	15031371	1	1	1	1	1	1	1	1	1	1	1	1	1	1	1	1	1	1	1	1
4	BICF2P1209076	15038765	4	4	4	4	4	4	4	4	4	4	4	4	4	4	4	4	4	4	4	4
4	BICF2P1017393	15045406	4	4	4	4	4	4	4	4	4	4	4	4	4	4	4	4	4	4	4	4
4	BICF2S243858	15046850	2	4	4	4	2	4	2	4	2	4	2	4	4	4	4	4	4	4	4	4
4	BICF2P381816	15058341	3	3	3	3	3	3	3	3	3	3	3	3	3	3	3	3	3	3	3	3
4	BICF2P425915	15094416	3	3	3	3	3	3	3	3	3	3	3	3	3	3	3	3	3	3	3	3
4	BICF2P363057	15103041	3	3	3	3	3	3	3	3	3	3	3	3	3	3	3	3	3	3	3	3
4	CHR4_15114389	15114389	1	3	3	3	1	3	1	3	1	3	1	3	3	3	3	3	3	3	3	3
4	CHR4_15126172	15126172	4	2	2	2	4	2	4	2	4	2	4	2	2	2	2	2	2	2	2	2
4	BICF2P1419906	15134352	4	4	4	4	4	4	4	4	4	4	4	4	4	4	4	4	4	4	4	4
4	CHR4_15144412	15144412	0	0	0	0	0	0	0	0	0	0	0	0	0	0	0	0	0	0	0	0
4	CHR4_15155609	15155609	3	1	1	1	3	1	3	1	3	1	3	1	1	1	1	1	1	1	1	1
4	CHR4_15165644	15165644	1	3	3	3	1	3	1	3	1	3	1	3	3	3	3	3	3	3	3	3
4	BICF2P115091	15168244	3	3	3	3	3	3	3	3	3	3	3	3	3	3	3	3	3	3	3	3
4	CHR4_15176252	15176252	1	3	3	3	1	3	1	3	1	3	1	3	3	3	3	3	3	3	3	3
4	CHR4_15186642	15186642	4	4	4	4	4	4	4	4	4	4	4	4	4	4	4	4	4	4	4	4
4	BICF2P742917	15190087	1	1	1	1	1	1	1	1	1	1	1	1	1	1	1	1	1	1	1	1
4	CHR4_15197694	15197694	0	0	0	0	0	0	0	0	0	0	0	0	0	0	0	0	0	0	0	0
4	CHR4_15210908	15210908	2	4	4	4	2	4	2	4	2	4	2	4	4	4	4	4	4	4	4	4
4	CHR4_15218047	15218047	4	2	2	2	4	2	4	2	4	2	4	2	2	2	2	2	2	2	2	2
4	CHR4_15228728	15228728	3	4	4	4	3	4	3	4	3	4	3	4	4	4	4	4	4	4	4	4
4	BICF2S23442080	15252845	2	4	4	4	2	4	2	4	2	4	2	4	4	4	4	4	4	4	4	4
4	CHR4_15262117	15262117	4	2	2	2	4	2	4	2	4	2	4	2	2	2	2	2	2	2	2	2
4	CHR4_15272613	15272613	1	3	3	3	1	3	1	3	1	3	1	3	3	3	3	3	3	3	3	3
4	CHR4_15284842	15284842	3	3	3	3	3	3	3	3	3	3	3	3	3	3	3	3	3	3	3	3
4	CHR4_15293861	15293861	1	3	3	3	1	3	1	3	1	3	1	3	3	3	3	3	3	3	3	3
4	CHR4_15307220	15307220	3	1	1	1	3	1	3	1	3	1	3	1	1	1	1	1	1	1	1	1
4	CHR4_15317250	15317250	2	2	2	2	2	2	2	2	2	2	2	2	2	2	2	2	2	2	2	2
4	CHR4_15324185	15324185	4	2	2	2	4	2	4	2	4	2	4	2	2	2	2	2	2	2	2	2
4	BICF2P100697	15341804	2	4	4	4	2	4	2	4	2	4	2	4	4	4	4	4	4	4	4	4
4	BICF2P165538	15345687	1	4	4	4	1	4	1	4	1	4	1	4	4	4	4	4	4	4	4	4
4	BICF2P1224514	15361805	3	2	2	2	3	2	3	2	3	2	3	2	2	2	2	2	2	2	2	2
4	BICF2P78185	15389624	1	3	3	3	1	3	1	3	1	3	1	3	3	3	3	3	3	3	3	3
4	BICF2P770012	15392157	3	1	1	1	3	1	3	1	3	1	3	1	1	1	1	1	1	1	1	1
4	BICF2S22912580	15405058	3	1	1	1	3	1	3	1	3	1	3	1	1	1	1	1	1	1	1	1
4	BICF2P670866	15416189	2	2	2	2	2	2	2	2	2	2	2	2	2	2	2	2	2	2	2	2
4	CHR4_15423312	15423312	1	1	1	1	1	1	1	1	1	1	1	1	1	1	1	1	1	1	1	1
4	BICF2P1216162	15423411	2	2	2	2	2	2	2	2	2	2	2	2	2	2	2	2	2	2	2	2
4	BICF2P1404678	15425649	1	1	1	1	1	1	1	1	1	1	1	1	1	1	1	1	1	1	1	1
4	CHR4_15426719	15426719	2	2	2	2	2	2	2	2	2	2	2	2	2	2	2	2	2	2	2	2
4	BICF2P1265026	15446929	1	1	1	1	1	1	1	1	1	1	1	1	1	1	1	1	1	1	1	1
4	BICF2S23739839	15457054	2	2	2	2	2	2	2	2	2	2	2	2	2	2	2	2	2	2	2	2
4	BICF2P969634	15463309	1	1	1	1	1	1	1	1	1	1	1	1	1	1	1	1	1	1	1	1
4	BICF2P1097634	15467364	3	1	1	1	3	1	3	1	3	1	3	1	1	1	1	1	1	1	1	1
4	BICF2S2309777	15472183	4	2	2	2	4	2	4	2	4	2	4	2	2	2	2	2	2	2	2	2
4	BICF2P518081	15491537	4	2	2	2	4	2	4	2	4	2	4	2	2	2	2	2	2	2	2	2
4	BICF2P527580	15495857	3	1	1	1	3	1	3	1	3	1	3	1	1	1	1	1	1	1	1	1
4	BICF2P355122	15504722	3	2	2	2	3	2	3	2	3	2	3	2	2	2	2	2	2	2	2	2
4	BICF2P1227842	15518212	4	4	3	4	3	4	3	4	3	4	4	4	3	4	4	4	4	4	4	4
4	BICF2P201166	15539358	3	1	3	1	1	1	1	1	1	1	3	1	3	1	3	3	3	3	3	3
4	BICF2P201167	15539813	4	2	4	2	2	2	2	2	2	2	4	2	4	2	4	4	4	4	4	4
4	BICF2P627056	15556729	3	1	3	1	1	1	1	1	1	1	3	1	3	1	3	3	3	3	3	3
4	BICF2S22940240	15568498	2	1	2	1	1	1	1	1	1	1	2	1	2	1	2	2	2	2	2	2
4	BICF2P835198	15575298	1	3	1	3	3	3	3	3	3	3	1	3	1	3	1	1	1	1	1	1
4	BICF2P419732	15587136	1	1	1	1	1	1	1	1	1	1	1	1	1	1	1	1	1	1	1	1
4	BICF2S22918122	15599479	4	2	4	2	2	2	2	2	2	2	4	2	4	2	4	4	4	4	4	4
4	BICF2P397267	15610481	1	1	3	1	3	1	3	1	3	1	1	1	3	1	1	1	1	1	1	1
4	BICF2S22924123	15624005	4	4	4	4	4	4	4	4	4	4	4	4	4	4	4	4	4	4	4	4
4	BICF2S23554004	15652966	1	1	1	1	1	1	1	1	1	1	1	1	1	1	1	1	1	1	1	1
4	BICF2S23722837	15662905	2	2	2	2	2	2	2	2	2	2	2	2	2	2	2	2	2	2	2	2
4	BICF2P1012132	15667354	3	1	1	1	3	1	3	1	3	1	3	1	1	1	1	1	1	1	1	1
4	BICF2P1386574	15687147	1	1	1	1	1	1	1	1	1	1	1	1	1	1	1	1	1	1	1	1
4	BICF2P90082	15693361	3	1	1	1	3	1	3	1	3	1	3	1	1	1	1	1	1	1	1	1
4	BICF2S23252565	15701192	1	1	1	1	1	1	1	1	1	1	1	1	1	1	1	1	1	1	1	1
4	BICF2P1458442	15714913	3	3	3	3	3	3	3	3	3	3	3	3	3	3	3	3	3	3	3	3
4	BICF2P450814	15727141	3	3	3	3	3	3	3	3	3	3	3	3	3	3	3	3	3	3	3	3
4	BICF2P1037385	15737953	2	2	2	2	2	2	2	2	2	2	2	2	2	2	2	2	2	2	2	2
4	BICF2P1369117	15754900	4	3	3	3	4	3	4	3	4	3	4	3	3	3	3	3	3	3	3	3
4	BICF2P317199	15761466	3	3	3	3	3	3	3	3	3	3	3	3	3	3	3	3	3	3	3	3
4	BICF2P1089872	15773945	1	1	1	1	1	1	1	1	1	1	1	1	1	1	1	1	1	1	1	1
4	BICF2P1209157	15775263	1	1	1	1	1	1	1	1	1	1	1	1	1	1	1	1	1	1	1	1
4	BICF2S23058362	15782907	4	2	4	2	2	2	2	2	2	2	4	2	4	2	4	4	4	4	4	4
4	BICF2P618599	15798172	2	2	2	2	2	2	2	2	2	2	2	2	2	2	2	2	2	2	2	2
4	BICF2P333931	15804593	4	4	4	4	4	4	4	4	4	4	4	4	4	4	4	4	4	4	4	4
4	BICF2P856401	15817869	3	1	3	1	3	3	3	3	3	3	3	1	3	1	1	1	1	1	1	1
4	BICF2P1023593	15837805	4	4	4	4	4	4	4	4	4	4	4	4	4	4	4	4	4	4	4	4
4	BICF2P758222	15839565	4	4	4	4	4	4	4	4	4	4	4	4	4	4	4	4	4	4	4	4
4	BICF2S23443575	15870642	3	1	3	1	3	3	3	3	3	3	3	1	3	1	1	1	1	1	1	1
4	BICF2P1028367	15876919	3	3	1	3	1	3	1	3	1	3	3	3	1	3	3	3	3	3	3	3
4	BICF2P137283	15894128	4	2	4	2	4	4	4	4	4	4	4	2	4	2	2	2	2	2	2	2
4	BICF2P219726	15903422	4	2	2	2	4	2	4	2	4	2	4	2	2	2	2	2	2	2	2	2
4	BICF2P1016928	15908567	3	1	3	1	3	3	3	3	3	3	3	1	3	1	1	1	1	1	1	1
4	BICF2P1446310	15919898	2	2	2	2	2	2	2	2	2	2	2	2	2	2	2	2	2	2	2	2
4	BICF2P1239323	15933114	3	3	3	3	3	3	3	3	3	3	3	3	3	3	3	3	3	3	3	3
4	BICF2P425655	15942777	2	2	2	2	2	2	2	2	2	2	2	2	2	2	2	2	2	2	2	2
4	BICF2P1410645	15959697	1	1	1	1	1	1	1	1	1	1	1	1	1	1	1	1	1	1	1	1
4	BICF2P1361609	15971808	1	4	4	4	1	4	1	4	1	4	1	4	4	4	4	4	4	4	4	4
4	BICF2P777257	15998775	3	3	3	3	3	3	3	3	3	3	3	3	3	3	3	3	3	3	3	3
4	BICF2P751610	16000676	1	2	1	2	2	2	2	2	2	2	1	2	1	2	1	1	1	1	1	1
4	BICF2P1408641	16015007	1	1	3	1	3	1	3	1	3	1	1	1	3	1	1	1	1	1	1	1
4	BICF2P176711	16023136	1	1	1	1	1	1	1	1	1	1	1	1	1	1	1	1	1	1	1	1
4	BICF2S22938930	16035891	3	3	3	3	3	3	3	3	3	3	3	3	3	3	3	3	3	3	3	3
4	BICF2P1271636	16050120	2	2	2	2	2	2	2	2	2	2	2	2	2	2	2	2	2	2	2	2
4	BICF2P513834	16059077	3	3	3	3	3	3	3	3	3	3	3	3	3	3	3	3	3	3	3	3
4	BICF2P1095261	16105115	3	3	3	3	3	3	3	3	3	3	3	3	3	3	3	3	3	3	3	3
4	BICF2P675498	16117490	3	3	1	3	1	3	1	3	1	3	3	3	1	3	3	3	3	3	3	3
4	BICF2P1460119	16133698	3	3	1	3	1	3	1	3	1	3	3	3	1	3	3	3	3	3	3	3
4	BICF2P1367506	16142248	2	2	2	2	2	2	2	2	2	2	2	2	2	2	2	2	2	2	2	2
4	BICF2P123100	16152246	4	4	2	4	2	4	2	4	2	4	4	4	2	4	4	4	4	4	4	4
4	BICF2P1324278	16166409	1	1	1	1	1	1	1	1	1	1	1	1	1	1	1	1	1	1	1	1
4	BICF2P595136	16172856	4	4	4	4	4	4	4	4	4	4	4	4	4	4	4	4	4	4	4	4
4	BICF2P394868	16185796	1	1	1	1	1	1	1	1	1	1	1	1	1	1	1	1	1	1	1	1
4	BICF2S234374	16216289	3	3	3	3	3	3	3	3	3	3	3	3	3	3	3	3	3	3	3	3
4	BICF2P1149103	16225626	4	2	4	2	2	2	2	2	2	2	4	2	4	2	4	4	4	4	4	4
4	BICF2P61108	16233925	1	1	1	1	1	1	1	1	1	1	1	1	1	1	1	1	1	1	1	1
4	BICF2P1292454	16243478	1	1	1	1	1	1	1	1	1	1	1	1	1	1	1	1	1	1	1	1
4	BICF2P496736	16260430	2	2	2	2	2	2	2	2	2	2	2	2	2	2	2	2	2	2	2	2
4	BICF2S23059074	16268312	1	2	1	2	2	2	2	2	2	2	1	2	1	2	1	1	1	1	1	1
4	BICF2P1228408	16278376	4	4	4	4	4	4	4	4	4	4	4	4	4	4	4	4	4	4	4	4
4	BICF2P1253	16321176	3	3	3	3	3	3	3	3	3	3	3	3	3	3	3	3	3	3	3	3
4	BICF2P431892	16325841	4	4	4	4	4	4	4	4	4	4	4	4	4	4	4	4	4	4	4	4
4	CHR4_16331875	16331875	3	3	1	3	1	3	1	3	1	3	3	3	1	3	3	3	3	3	3	3
4	CHR4_16342909	16342909	3	3	3	3	3	3	3	3	3	3	3	3	3	3	3	3	3	3	3	3
4	BICF2P703237	16344277	4	4	4	4	4	4	4	4	4	4	4	4	4	4	4	4	4	4	4	4
4	CHR4_16353246	16353246	2	2	2	2	2	2	2	2	2	2	2	2	2	2	2	2	2	2	2	2
4	TIGRP2P59073_RS8580644	16355915	2	2	2	2	2	2	2	2	2	2	2	2	2	2	2	2	2	2	2	2
4	BICF2P1345505	16358040	4	4	4	4	4	4	4	4	4	4	4	4	4	4	4	4	4	4	4	4
4	CHR4_16364864	16364864	4	4	4	4	4	4	4	4	4	4	4	4	4	4	4	4	4	4	4	4
4	CHR4_16376713	16376713	1	1	1	1	1	1	1	1	1	1	1	1	1	1	1	1	1	1	1	1
4	BICF2S23634084	16386613	4	4	4	4	4	4	4	4	4	4	4	4	4	4	4	4	4	4	4	4
4	BICF2P225980	16405276	3	3	3	3	3	3	3	3	3	3	3	3	3	3	3	3	3	3	3	3
4	BICF2P17120	16419392	4	4	2	4	2	4	2	4	2	4	4	4	2	4	4	4	4	4	4	4
4	BICF2P1355541	16426039	1	1	1	1	1	1	1	1	1	1	1	1	1	1	1	1	1	1	1	1
4	TIGRP2P59075_RS9229057	16439675	4	4	4	4	4	4	4	4	4	4	4	4	4	4	4	4	4	4	4	4
4	BICF2S23628875	16454884	1	1	1	1	1	1	1	1	1	1	1	1	1	1	1	1	1	1	1	1
4	BICF2P1243315	16468796	4	4	4	4	4	4	4	4	4	4	4	4	4	4	4	4	4	4	4	4
4	BICF2S2373807	16471555	3	3	3	3	3	3	3	3	3	3	3	3	3	3	3	3	3	3	3	3
4	BICF2P1005041	16485321	1	1	1	1	1	1	1	1	1	1	1	1	1	1	1	1	1	1	1	1
4	BICF2P1128990	16500233	4	4	4	4	4	4	4	4	4	4	4	4	4	4	4	4	4	4	4	4
4	BICF2P1232055	16508690	2	2	2	2	2	2	2	2	2	2	2	2	2	2	2	2	2	2	2	2
4	BICF2P883235	16527337	3	3	3	3	3	3	3	3	3	3	3	3	3	3	3	3	3	3	3	3
4	BICF2P637509	16539244	2	2	2	2	2	2	2	2	2	2	2	2	2	2	2	2	2	2	2	2
4	BICF2P1036326	16548462	1	1	3	1	3	1	3	1	3	1	1	1	3	1	1	1	1	1	1	1
4	BICF2P1204548	16551736	2	2	2	2	2	2	2	2	2	2	2	2	2	2	2	2	2	2	2	2
4	BICF2P920873	16566233	1	1	3	1	3	1	3	1	3	1	1	1	3	1	1	1	1	1	1	1
4	BICF2P273910	16581675	2	2	2	2	2	2	2	2	2	2	2	2	2	2	2	2	2	2	2	2
4	BICF2P1225382	16603731	1	1	1	1	1	1	1	1	1	1	1	1	1	1	1	1	1	1	1	1
4	BICF2P1415063	16610219	3	3	3	3	3	3	3	3	3	3	3	3	3	3	3	3	3	3	3	3
4	BICF2P1260871	16623786	4	4	4	4	4	4	4	4	4	4	4	4	4	4	4	4	4	4	4	4
4	BICF2P823242	16654642	1	2	2	2	1	2	1	2	1	2	1	2	2	2	2	2	2	2	2	2
4	TIGRP2P59080_RS9008332	16665878	1	1	1	1	1	1	1	1	1	1	1	1	1	1	1	1	1	1	1	1
4	BICF2P564368	16676039	3	3	3	3	3	3	3	3	3	3	3	3	3	3	3	3	3	3	3	3
4	BICF2P454124	16701263	3	3	2	3	2	3	2	3	2	3	3	3	2	3	3	3	3	3	3	3
4	BICF2P1112303	16718070	2	2	1	2	1	2	1	2	1	2	2	2	1	2	2	2	2	2	2	2
4	BICF2P99667	16727427	4	2	2	2	4	2	4	2	4	2	4	2	2	2	2	2	2	2	2	2
4	BICF2P1469250	16736687	1	3	3	3	1	3	1	3	1	3	1	3	3	3	3	3	3	3	3	3
4	BICF2P1166440	16752575	1	1	2	1	2	1	2	1	2	1	1	1	2	1	1	1	1	1	1	1
4	BICF2S23528860	16759944	4	4	2	4	2	4	2	4	2	4	4	4	2	4	4	4	4	4	4	4
4	BICF2S2296352	16778830	4	4	4	4	4	4	4	4	4	4	4	4	4	4	4	4	4	4	4	4
4	BICF2S23258614	16784040	1	1	3	1	3	1	3	1	3	1	1	1	3	1	1	1	1	1	1	1
4	BICF2P1160048	16798810	1	2	1	2	2	2	2	2	2	2	1	2	1	2	1	1	1	1	1	1
4	BICF2P83308	16805226	2	4	2	4	4	4	4	4	4	4	2	4	2	4	2	2	2	2	2	2
4	BICF2S2292528	16816498	2	2	4	2	4	2	4	2	4	2	2	2	4	2	2	2	2	2	2	2
4	BICF2P722832	16829789	4	4	4	4	4	4	4	4	4	4	4	4	4	4	4	4	4	4	4	4
4	BICF2P600360	16854630	1	3	1	3	1	1	1	1	1	1	1	3	1	3	3	3	3	3	3	3
4	BICF2P716965	16864815	4	4	4	4	4	4	4	4	4	4	4	4	4	4	4	4	4	4	4	4
4	BICF2P1439092	16875930	1	1	3	1	3	1	3	1	3	1	1	1	3	1	1	1	1	1	1	1
4	BICF2P1201435	16901916	3	3	1	3	1	3	1	3	1	3	3	3	1	3	3	3	3	3	3	3
4	BICF2P237204	16913390	1	1	3	1	3	1	3	1	3	1	1	1	3	1	1	1	1	1	1	1
4	BICF2P299389	16928199	4	4	4	4	4	4	4	4	4	4	4	4	4	4	4	4	4	4	4	4
4	BICF2P180200	16937997	2	2	2	2	2	2	2	2	2	2	2	2	2	2	2	2	2	2	2	2
4	BICF2P683722	16942991	3	3	1	3	1	3	1	3	1	3	3	3	1	3	3	3	3	3	3	3
4	BICF2S23643128	16965363	3	3	3	3	3	3	3	3	3	3	3	3	3	3	3	3	3	3	3	3
4	BICF2P772162	16972250	2	2	1	2	1	2	1	2	1	2	2	2	1	2	2	2	2	2	2	2
4	BICF2P1071024	16979437	1	1	3	1	3	1	3	1	3	1	1	1	3	1	1	1	1	1	1	1
4	BICF2P339409	16991753	1	1	2	1	2	1	2	1	2	1	1	1	2	1	1	1	1	1	1	1
4	BICF2P534180	17003555	1	1	3	1	3	1	3	1	3	1	1	1	3	1	1	1	1	1	1	1
4	BICF2P1154027	17013749	2	2	1	2	1	2	1	2	1	2	2	2	1	2	2	2	2	2	2	2
4	BICF2P549645	17037655	3	3	4	3	4	3	4	3	4	3	3	3	4	3	3	3	3	3	3	3
4	BICF2P1090843	17064873	1	1	1	1	1	1	1	1	1	1	1	1	1	1	1	1	1	1	1	1
4	BICF2P262670	17080584	4	4	4	4	4	4	4	4	4	4	4	4	4	4	4	4	4	4	4	4
4	CHR4_17088180	17088180	1	1	1	1	1	1	1	1	1	1	1	1	1	1	1	1	1	1	1	1
4	G274F44S167	17106875	1	1	1	1	1	1	1	1	1	1	1	1	1	1	1	1	1	1	1	1
4	BICF2P931542	17126990	4	4	4	4	4	4	4	4	4	4	4	4	4	4	4	4	4	4	4	4
4	BICF2P620368	17139219	4	4	3	4	3	4	3	4	3	4	4	4	3	4	4	4	4	4	4	4
4	BICF2P528448	17150109	3	3	3	3	3	3	3	3	3	3	3	3	3	3	3	3	3	3	3	3
4	BICF2P594239	17173048	1	3	1	3	3	3	3	3	3	3	1	3	1	3	1	1	1	1	1	1
4	BICF2S24410277	17198211	2	2	4	2	4	2	4	2	4	2	2	2	4	2	2	2	2	2	2	2
4	G275F27S115	17232071	2	2	1	2	1	2	1	2	1	2	2	2	1	2	2	2	2	2	2	2
4	BICF2S23413306	17258269	4	4	4	4	4	4	4	4	4	4	4	4	4	4	4	4	4	4	4	4
4	BICF2P1286479	17270413	4	4	4	4	4	4	4	4	4	4	4	4	4	4	4	4	4	4	4	4
4	G276F56S163	17300440	2	2	2	2	2	2	2	2	2	2	2	2	2	2	2	2	2	2	2	2
4	CHR4_17309408	17309408	1	3	3	3	1	3	1	3	1	3	1	3	3	3	3	3	3	3	3	3
4	BICF2P307903	17319986	3	3	3	3	3	3	3	3	3	3	3	3	3	3	3	3	3	3	3	3
4	CHR4_17327501	17327501	1	1	3	1	3	1	3	1	3	1	1	1	3	1	1	1	1	1	1	1
4	BICF2P862044	17338527	4	4	4	4	4	4	4	4	4	4	4	4	4	4	4	4	4	4	4	4
4	BICF2P335484	17351663	3	3	1	3	1	3	1	3	1	3	3	3	1	3	3	3	3	3	3	3
4	BICF2P153523	17356091	3	3	4	3	4	3	4	3	4	3	3	3	4	3	3	3	3	3	3	3
4	BICF2P154107	17366062	2	2	4	2	4	2	4	2	4	2	2	2	4	2	2	2	2	2	2	2
4	BICF2P932119	17368888	4	4	2	4	2	4	2	4	2	4	4	4	2	4	4	4	4	4	4	4
4	BICF2P739518	17382382	2	2	4	2	4	2	4	2	4	2	2	2	4	2	2	2	2	2	2	2
4	BICF2P802319	17393298	1	1	3	1	3	1	3	1	3	1	1	1	3	1	1	1	1	1	1	1
4	BICF2P1327665	17412899	4	4	2	4	2	4	2	4	2	4	4	4	2	4	4	4	4	4	4	4
4	BICF2S23642261	17435985	3	3	3	3	3	3	3	3	3	3	3	3	3	3	3	3	3	3	3	3
4	BICF2P1203353	17446015	1	1	2	1	2	1	2	1	2	1	1	1	2	1	1	1	1	1	1	1
4	BICF2P609975	17452401	3	3	1	3	1	3	1	3	1	3	3	3	1	3	3	3	3	3	3	3
4	BICF2S2364156	17462016	1	1	2	1	2	1	2	1	2	1	1	1	2	1	1	1	1	1	1	1
4	BICF2S23659038	17472195	2	2	4	2	4	2	4	2	4	2	2	2	4	2	2	2	2	2	2	2
4	BICF2P1057344	17487766	4	4	4	4	4	4	4	4	4	4	4	4	4	4	4	4	4	4	4	4
4	BICF2P888031	17499080	3	3	1	3	1	3	1	3	1	3	3	3	1	3	3	3	3	3	3	3
4	BICF2P197533	17517523	4	4	3	4	3	4	3	4	3	4	4	4	3	4	4	4	4	4	4	4
4	BICF2S23447405	17518453	2	2	2	2	2	2	2	2	2	2	2	2	2	2	2	2	2	2	2	2
4	BICF2P1289513	17548241	4	4	1	4	1	4	1	4	1	4	4	4	1	4	4	4	4	4	4	4
4	BICF2P1030968	17557593	4	4	2	4	2	4	2	4	2	4	4	4	2	4	4	4	4	4	4	4
4	BICF2P138335	17566193	1	1	1	1	1	1	1	1	1	1	1	1	1	1	1	1	1	1	1	1
4	BICF2P725116	17579877	1	1	1	1	1	1	1	1	1	1	1	1	1	1	1	1	1	1	1	1
4	BICF2P27027	17597189	1	1	3	1	3	1	3	1	3	1	1	1	3	1	1	1	1	1	1	1
4	BICF2P257499	17609097	2	2	1	2	1	2	1	2	1	2	2	2	1	2	2	2	2	2	2	2
4	TIGRP2P59091_RS9001411	17613209	4	4	4	4	4	4	4	4	4	4	4	4	4	4	4	4	4	4	4	4
4	BICF2P269836	17626657	2	2	3	2	3	2	3	2	3	2	2	2	3	2	2	2	2	2	2	2
4	BICF2P1240827	17632091	3	3	3	3	3	3	3	3	3	3	3	3	3	3	3	3	3	3	3	3
4	BICF2P756879	17640501	2	2	2	2	2	2	2	2	2	2	2	2	2	2	2	2	2	2	2	2
4	BICF2P1242750	17644555	3	3	1	3	1	3	1	3	1	3	3	3	1	3	3	3	3	3	3	3
4	BICF2P1228131	17659605	4	4	4	4	4	4	4	4	4	4	4	4	4	4	4	4	4	4	4	4
4	BICF2P153366	17677314	1	1	1	1	1	1	1	1	1	1	1	1	1	1	1	1	1	1	1	1
4	BICF2P1093072	17681958	4	4	4	4	4	4	4	4	4	4	4	4	4	4	4	4	4	4	4	4
4	BICF2P485084	17706121	4	4	2	4	2	4	2	4	2	4	4	4	2	4	4	4	4	4	4	4
4	BICF2P121194	17714653	3	3	3	3	3	3	3	3	3	3	3	3	3	3	3	3	3	3	3	3
4	BICF2P713281	17729887	1	3	3	3	1	3	1	3	1	3	1	3	3	3	3	3	3	3	3	3
4	BICF2P55603	17741103	3	3	3	3	3	3	3	3	3	3	3	3	3	3	3	3	3	3	3	3
4	BICF2P1196797	17748568	4	4	2	4	2	4	2	4	2	4	4	4	2	4	4	4	4	4	4	4
4	BICF2P949072	17776813	1	3	3	3	1	3	1	3	1	3	1	3	3	3	3	3	3	3	3	3
4	BICF2P533731	17782609	3	1	1	1	3	1	3	1	3	1	3	1	1	1	1	1	1	1	1	1
4	BICF2P962440	17801615	3	3	3	3	3	3	3	3	3	3	3	3	3	3	3	3	3	3	3	3
4	BICF2P278404	17811081	1	1	1	1	1	1	1	1	1	1	1	1	1	1	1	1	1	1	1	1
4	BICF2P586239	17823669	2	2	2	2	2	2	2	2	2	2	2	2	2	2	2	2	2	2	2	2
4	BICF2P461008	17833068	1	1	1	1	1	1	1	1	1	1	1	1	1	1	1	1	1	1	1	1
4	BICF2P793555	17842780	4	4	4	4	4	4	4	4	4	4	4	4	4	4	4	4	4	4	4	4
4	BICF2P409930	17852461	1	1	1	1	1	1	1	1	1	1	1	1	1	1	1	1	1	1	1	1
4	BICF2P9817	17864688	1	4	4	4	1	4	1	4	1	4	1	4	4	4	4	4	4	4	4	4
4	BICF2P1171270	17877023	2	4	4	4	2	4	2	4	2	4	2	4	4	4	4	4	4	4	4	4
4	BICF2P177033	17891589	4	4	4	4	4	4	4	4	4	4	4	4	4	4	4	4	4	4	4	4
4	BICF2P687168	17900201	2	2	2	2	2	2	2	2	2	2	2	2	2	2	2	2	2	2	2	2
4	BICF2P457856	17909862	1	1	1	1	1	1	1	1	1	1	1	1	1	1	1	1	1	1	1	1
4	BICF2P1106286	17930116	1	1	1	1	1	1	1	1	1	1	1	1	1	1	1	1	1	1	1	1
4	BICF2P465910	17932921	2	2	2	2	2	2	2	2	2	2	2	2	2	2	2	2	2	2	2	2
4	CHR4_17951462	17951462	4	2	2	2	4	2	4	2	4	2	4	2	2	2	2	2	2	2	2	2
4	BICF2S22957729	17959957	4	2	2	2	4	2	4	2	4	2	4	2	2	2	2	2	2	2	2	2
4	CHR4_17966100	17966100	3	3	3	3	3	3	3	3	3	3	3	3	3	3	3	3	3	3	3	3
4	CHR4_17978285	17978285	2	4	2	4	4	4	4	4	4	4	2	4	2	4	2	2	2	2	2	2
4	CHR4_17988036	17988036	1	3	1	3	3	3	3	3	3	3	1	3	1	3	1	1	1	1	1	1
4	CHR4_17991677	17991677	3	3	3	3	3	3	3	3	3	3	3	3	3	3	3	3	3	3	3	3
4	BICF2P1371168	17998161	2	2	2	2	2	2	2	2	2	2	2	2	2	2	2	2	2	2	2	2
4	BICF2P206990	18005382	4	2	2	2	4	2	4	2	4	2	4	2	2	2	2	2	2	2	2	2
4	BICF2P280346	18019189	1	3	3	3	1	3	1	3	1	3	1	3	3	3	3	3	3	3	3	3
4	BICF2P1228341	18029000	4	1	1	1	4	1	4	1	4	1	4	1	1	1	1	1	1	1	1	1
4	BICF2P97689	18041803	4	4	4	4	4	4	4	4	4	4	4	4	4	4	4	4	4	4	4	4
4	BICF2S23228796	18046006	3	1	1	1	3	1	3	1	3	1	3	1	1	1	1	1	1	1	1	1
4	BICF2P1106194	18062748	2	4	4	4	2	4	2	4	2	4	2	4	4	4	4	4	4	4	4	4
4	BICF2P238272	18090829	4	4	4	4	4	4	4	4	4	4	4	4	4	4	4	4	4	4	4	4
4	BICF2P265257	18092075	3	3	3	3	3	3	3	3	3	3	3	3	3	3	3	3	3	3	3	3
4	BICF2P352037	18108396	2	2	2	2	2	2	2	2	2	2	2	2	2	2	2	2	2	2	2	2
4	BICF2P578569	18121797	1	1	1	1	1	1	1	1	1	1	1	1	1	1	1	1	1	1	1	1
4	BICF2P134702	18127172	1	1	2	1	2	1	2	1	2	1	1	1	2	1	1	1	1	1	1	1
4	BICF2S23161154	18143000	1	1	3	1	3	1	3	1	3	1	1	1	3	1	1	1	1	1	1	1
4	BICF2P66464	18152000	3	3	1	3	1	3	1	3	1	3	3	3	1	3	3	3	3	3	3	3
4	CHR4_18160265	18160265	1	1	1	1	1	1	1	1	1	1	1	1	1	1	1	1	1	1	1	1
4	BICF2P3	18170859	4	4	2	4	2	4	2	4	2	4	4	4	2	4	4	4	4	4	4	4
4	BICF2P4	18170999	2	2	4	2	4	2	4	2	4	2	2	2	4	2	2	2	2	2	2	2
4	BICF2P10	18172846	3	3	3	3	3	3	3	3	3	3	3	3	3	3	3	3	3	3	3	3
4	BICF2P1177341	18183651	2	2	2	2	2	2	2	2	2	2	2	2	2	2	2	2	2	2	2	2
4	BICF2P70846	18197403	3	3	3	3	3	3	3	3	3	3	3	3	3	3	3	3	3	3	3	3
4	BICF2S23030187	18216488	4	2	2	2	4	2	4	2	4	2	4	2	2	2	2	2	2	2	2	2
4	BICF2S23019883	18220124	1	4	4	4	1	4	1	4	1	4	1	4	4	4	4	4	4	4	4	4
4	BICF2S23412281	18235322	4	2	2	2	4	2	4	2	4	2	4	2	2	2	2	2	2	2	2	2
4	BICF2P1248334	18242424	1	1	1	1	1	1	1	1	1	1	1	1	1	1	1	1	1	1	1	1
4	BICF2P1016821	18254987	1	3	3	3	1	3	1	3	1	3	1	3	3	3	3	3	3	3	3	3
4	BICF2P1212020	18271726	3	3	1	3	1	3	1	3	1	3	3	3	1	3	3	3	3	3	3	3
4	BICF2P449161	18276872	3	3	3	3	3	3	3	3	3	3	3	3	3	3	3	3	3	3	3	3
4	BICF2P205796	18291528	4	4	4	4	4	4	4	4	4	4	4	4	4	4	4	4	4	4	4	4
4	BICF2P733650	18306195	1	1	2	1	2	1	2	1	2	1	1	1	2	1	1	1	1	1	1	1
4	BICF2P334243	18313714	3	3	1	3	1	3	1	3	1	3	3	3	1	3	3	3	3	3	3	3
4	BICF2P1165202	18322317	1	1	1	1	1	1	1	1	1	1	1	1	1	1	1	1	1	1	1	1
4	BICF2P1225264	18340743	1	1	1	1	1	1	1	1	1	1	1	1	1	1	1	1	1	1	1	1
4	BICF2P213650	18350538	4	2	4	2	4	4	4	4	4	4	4	2	4	2	2	2	2	2	2	2
4	BICF2P206994	18360662	4	4	4	4	4	4	4	4	4	4	4	4	4	4	4	4	4	4	4	4
4	BICF2S22932730	18369921	2	4	2	4	4	4	4	4	4	4	2	4	2	4	2	2	2	2	2	2
4	BICF2P541736	18387091	4	2	4	2	4	4	4	4	4	4	4	2	4	2	2	2	2	2	2	2
4	BICF2S2321947	18393305	4	4	4	4	4	4	4	4	4	4	4	4	4	4	4	4	4	4	4	4
4	BICF2P207891	18405360	4	4	4	4	4	4	4	4	4	4	4	4	4	4	4	4	4	4	4	4
4	BICF2P749039	18414258	2	2	2	2	2	2	2	2	2	2	2	2	2	2	2	2	2	2	2	2
4	BICF2P1233434	18433754	3	3	3	3	3	3	3	3	3	3	3	3	3	3	3	3	3	3	3	3
4	BICF2P733837	18439674	3	3	3	3	3	3	3	3	3	3	3	3	3	3	3	3	3	3	3	3
4	BICF2P977615	18453113	4	4	4	4	4	4	4	4	4	4	4	4	4	4	4	4	4	4	4	4
4	BICF2P760905	18464387	4	2	4	2	2	2	2	2	2	2	4	2	4	2	4	4	4	4	4	4
4	BICF2P157507	18479668	4	4	2	4	2	4	2	4	2	4	4	4	2	4	4	4	4	4	4	4
4	BICF2P1205749	18483736	1	1	3	1	3	1	3	1	3	1	1	1	3	1	1	1	1	1	1	1
4	BICF2P562498	18494522	4	4	2	4	2	4	2	4	2	4	4	4	2	4	4	4	4	4	4	4
4	BICF2P1406437	18509092	1	1	3	1	3	1	3	1	3	1	1	1	3	1	1	1	1	1	1	1
4	BICF2P461087	18530777	2	2	2	2	2	2	2	2	2	2	2	2	2	2	2	2	2	2	2	2
4	BICF2P1018887	18556048	4	3	3	3	4	3	4	3	4	3	4	3	3	3	3	3	3	3	3	3
4	BICF2P916291	18566126	4	2	2	2	4	2	4	2	4	2	4	2	2	2	2	2	2	2	2	2
4	BICF2P615287	18580882	4	2	2	2	4	2	4	2	4	2	4	2	2	2	2	2	2	2	2	2
4	BICF2P1401335	18590919	3	1	3	1	3	3	3	3	3	3	3	1	3	1	1	1	1	1	1	1
4	BICF2P1440034	18604681	1	3	1	3	1	1	1	1	1	1	1	3	1	3	3	3	3	3	3	3
4	BICF2S23411769	18615065	4	2	4	2	2	2	2	2	2	2	4	2	4	2	4	4	4	4	4	4
4	BICF2P8389	18621506	2	4	2	4	4	4	4	4	4	4	2	4	2	4	2	2	2	2	2	2
4	BICF2P901209	18634278	3	1	3	1	3	3	3	3	3	3	3	1	3	1	1	1	1	1	1	1
4	BICF2P986521	18645823	4	2	2	2	4	2	4	2	4	2	4	2	2	2	2	2	2	2	2	2
4	BICF2P1277340	18658320	1	1	1	1	1	1	1	1	1	1	1	1	1	1	1	1	1	1	1	1
4	BICF2P8112	18677472	4	2	2	2	4	2	4	2	4	2	4	2	2	2	2	2	2	2	2	2
4	BICF2P1232301	18682549	1	1	1	1	1	1	1	1	1	1	1	1	1	1	1	1	1	1	1	1
4	BICF2P295702	18695124	4	2	4	2	4	4	4	4	4	4	4	2	4	2	2	2	2	2	2	2
4	BICF2P704087	18709159	1	3	1	3	1	1	1	1	1	1	1	3	1	3	3	3	3	3	3	3
4	BICF2P531262	18723598	2	3	3	3	2	3	2	3	2	3	2	3	3	3	3	3	3	3	3	3
4	BICF2P531261	18726223	4	3	3	3	4	3	4	3	4	3	4	3	3	3	3	3	3	3	3	3
4	BICF2P151093	18746385	2	4	4	4	2	4	2	4	2	4	2	4	4	4	4	4	4	4	4	4
4	BICF2P23586	18753167	3	3	1	3	1	3	1	3	1	3	3	3	1	3	3	3	3	3	3	3
4	BICF2P1081289	18761718	4	4	1	4	1	4	1	4	1	4	4	4	1	4	4	4	4	4	4	4
4	CHR4_18772419	18772419	4	2	4	2	4	4	4	4	4	4	4	2	4	2	2	2	2	2	2	2
4	CHR4_18784955	18784955	1	2	1	2	1	1	1	1	1	1	1	2	1	2	2	2	2	2	2	2
4	BICF2S2343514	18796918	2	2	2	2	2	2	2	2	2	2	2	2	2	2	2	2	2	2	2	2
4	BICF2P212693	18802722	3	3	3	3	3	3	3	3	3	3	3	3	3	3	3	3	3	3	3	3
4	TIGRP2P59109_RS8633640	18805762	2	2	2	2	2	2	2	2	2	2	2	2	2	2	2	2	2	2	2	2
4	CHR4_18808386	18808386	4	3	3	3	4	3	4	3	4	3	4	3	3	3	3	3	3	3	3	3
4	CHR4_18818457	18818457	3	3	3	3	3	3	3	3	3	3	3	3	3	3	3	3	3	3	3	3
4	BICF2P1039367	18827700	2	2	2	2	2	2	2	2	2	2	2	2	2	2	2	2	2	2	2	2
4	BICF2P1224620	18842612	1	1	1	1	1	1	1	1	1	1	1	1	1	1	1	1	1	1	1	1
4	BICF2P1224621	18842880	2	4	4	4	2	4	2	4	2	4	2	4	4	4	4	4	4	4	4	4
4	BICF2P1053785	18850942	3	1	1	1	3	1	3	1	3	1	3	1	1	1	1	1	1	1	1	1
4	BICF2P200963	18885012	3	1	1	1	3	1	3	1	3	1	3	1	1	1	1	1	1	1	1	1
4	BICF2P867447	18888469	4	2	2	2	4	2	4	2	4	2	4	2	2	2	2	2	2	2	2	2
4	BICF2S22926606	18907907	3	1	3	1	1	1	1	1	1	1	3	1	3	1	3	3	3	3	3	3
4	BICF2P187490	18925867	3	2	3	2	3	3	3	3	3	3	3	2	3	2	2	2	2	2	2	2
4	BICF2P778320	18934964	3	3	3	3	3	3	3	3	3	3	3	3	3	3	3	3	3	3	3	3
4	BICF2P828549	18948565	1	3	1	3	3	3	3	3	3	3	1	3	1	3	1	1	1	1	1	1
4	BICF2P509581	18964725	2	2	4	2	4	2	4	2	4	2	2	2	4	2	2	2	2	2	2	2
4	TIGRP2P59113_RS8728424	18971983	4	4	4	4	4	4	4	4	4	4	4	4	4	4	4	4	4	4	4	4
4	BICF2S23218311	18988132	4	4	4	4	4	4	4	4	4	4	4	4	4	4	4	4	4	4	4	4
4	BICF2P358230	18989669	4	4	4	4	4	4	4	4	4	4	4	4	4	4	4	4	4	4	4	4
4	BICF2P328299	19004645	1	1	1	1	1	1	1	1	1	1	1	1	1	1	1	1	1	1	1	1
4	BICF2P482108	19014493	1	3	1	3	1	1	1	1	1	1	1	3	1	3	3	3	3	3	3	3
4	BICF2P130404	19027850	2	2	2	2	2	2	2	2	2	2	2	2	2	2	2	2	2	2	2	2
4	BICF2S23058140	19037878	4	4	4	4	4	4	4	4	4	4	4	4	4	4	4	4	4	4	4	4
4	BICF2P1234557	19046890	4	4	4	4	4	4	4	4	4	4	4	4	4	4	4	4	4	4	4	4
4	CHR4_19055136	19055136	3	3	3	3	3	3	3	3	3	3	3	3	3	3	3	3	3	3	3	3
4	BICF2P890230	19061573	1	1	1	1	1	1	1	1	1	1	1	1	1	1	1	1	1	1	1	1
4	BICF2P132086	19079546	1	1	1	1	1	1	1	1	1	1	1	1	1	1	1	1	1	1	1	1
4	BICF2P541620	19083573	2	2	2	2	2	2	2	2	2	2	2	2	2	2	2	2	2	2	2	2
4	CHR4_19114717	19114717	3	3	3	3	3	3	3	3	3	3	3	3	3	3	3	3	3	3	3	3
4	BICF2P441872	19120946	2	2	2	2	2	2	2	2	2	2	2	2	2	2	2	2	2	2	2	2
4	BICF2S2316034	19137559	4	4	4	4	4	4	4	4	4	4	4	4	4	4	4	4	4	4	4	4
4	BICF2P551714	19139911	1	1	1	1	1	1	1	1	1	1	1	1	1	1	1	1	1	1	1	1
4	CHR4_19158897	19158897	3	3	3	3	3	3	3	3	3	3	3	3	3	3	3	3	3	3	3	3
4	CHR4_19159702	19159702	3	3	3	3	3	3	3	3	3	3	3	3	3	3	3	3	3	3	3	3
4	BICF2S23542998	19164081	4	4	4	4	4	4	4	4	4	4	4	4	4	4	4	4	4	4	4	4
4	CHR4_19174289	19174289	3	3	3	3	3	3	3	3	3	3	3	3	3	3	3	3	3	3	3	3
4	CHR4_19185298	19185298	1	1	1	1	1	1	1	1	1	1	1	1	1	1	1	1	1	1	1	1
4	BICF2P1440430	19188230	4	4	4	4	4	4	4	4	4	4	4	4	4	4	4	4	4	4	4	4
4	CHR4_19195617	19195617	1	1	1	1	1	1	1	1	1	1	1	1	1	1	1	1	1	1	1	1
4	BICF2P253619	19205413	1	1	1	1	1	1	1	1	1	1	1	1	1	1	1	1	1	1	1	1
4	BICF2S22960133	19205803	2	2	2	2	2	2	2	2	2	2	2	2	2	2	2	2	2	2	2	2
4	CHR4_19211574	19211575	0	0	0	0	0	0	0	0	0	0	0	0	0	0	0	0	0	0	0	0
4	CHR4_19211960	19211960	2	2	2	2	2	2	2	2	2	2	2	2	2	2	2	2	2	2	2	2
4	BICF2P751234	19215607	1	1	1	1	1	1	1	1	1	1	1	1	1	1	1	1	1	1	1	1
4	CHR4_19215948	19215948	4	4	4	4	4	4	4	4	4	4	4	4	4	4	4	4	4	4	4	4
4	CHR4_19227066	19227066	3	3	3	3	3	3	3	3	3	3	3	3	3	3	3	3	3	3	3	3
4	BICF2P420073	19237861	4	4	4	4	4	4	4	4	4	4	4	4	4	4	4	4	4	4	4	4
4	BICF2P362755	19271931	1	1	1	1	1	1	1	1	1	1	1	1	1	1	1	1	1	1	1	1
4	BICF2S23624064	19277977	1	1	1	1	1	1	1	1	1	1	1	1	1	1	1	1	1	1	1	1
4	CHR4_19279859	19279859	4	4	4	4	4	4	4	4	4	4	4	4	4	4	4	4	4	4	4	4
4	CHR4_19290015	19290015	4	4	4	4	4	4	4	4	4	4	4	4	4	4	4	4	4	4	4	4
4	CHR4_19299583	19299583	2	2	2	2	2	2	2	2	2	2	2	2	2	2	2	2	2	2	2	2
4	CHR4_19308205	19308205	2	2	2	2	2	2	2	2	2	2	2	2	2	2	2	2	2	2	2	2
4	CHR4_19343926	19343926	1	1	1	1	1	1	1	1	1	1	1	1	1	1	1	1	1	1	1	1
4	BICF2P1371182	19344592	4	4	4	4	4	4	4	4	4	4	4	4	4	4	4	4	4	4	4	4
4	TIGRP2P59139_RS8982894	19350776	2	2	2	2	2	2	2	2	2	2	2	2	2	2	2	2	2	2	2	2
4	CHR4_19356204	19356204	1	1	1	1	1	1	1	1	1	1	1	1	1	1	1	1	1	1	1	1
4	BICF2S22912145	19364699	1	4	1	4	1	1	1	1	1	1	1	4	1	4	4	4	4	4	4	4
4	BICF2S23058417	19389920	3	3	3	3	3	3	3	3	3	3	3	3	3	3	3	3	3	3	3	3
4	CHR4_19399749	19399749	3	1	3	1	1	1	1	1	1	1	3	1	3	1	3	3	3	3	3	3
4	CHR4_19410644	19410644	2	4	2	4	4	4	4	4	4	4	2	4	2	4	2	2	2	2	2	2
4	CHR4_19420905	19420905	3	1	3	1	1	1	1	1	1	1	3	1	3	1	3	3	3	3	3	3
4	BICF2P283450	19431539	3	3	3	3	3	3	3	3	3	3	3	3	3	3	3	3	3	3	3	3
4	CHR4_19442154	19442154	0	0	0	0	0	0	0	0	0	0	0	0	0	0	0	0	0	0	0	0
4	BICF2S22917852	19458332	4	2	4	2	4	4	4	4	4	4	4	2	2	2	2	2	2	2	2	2
4	BICF2S23333361	19463345	4	4	4	4	4	4	4	4	4	4	4	4	4	4	4	4	4	4	4	4
4	TIGRP2P59147_RS8717016	19484014	4	4	4	4	4	4	4	4	4	4	4	4	4	4	4	4	4	4	4	4
4	BICF2P537798	19516423	3	3	1	3	1	3	1	3	1	3	3	3	3	3	3	3	3	3	3	3
4	BICF2P1154729	19522520	2	2	4	2	4	2	4	2	4	2	2	2	2	2	2	2	2	2	2	2
4	BICF2S2373856	19554773	2	2	2	2	2	2	2	2	2	2	2	2	2	2	2	2	2	2	2	2
4	BICF2P273000	19570051	2	1	1	1	2	1	2	1	2	1	2	1	1	1	1	1	1	1	1	1
4	BICF2P162948	19593351	3	3	1	3	1	3	1	3	1	3	3	3	3	3	3	3	3	3	3	3
4	BICF2P882825	19599660	4	4	3	4	3	4	3	4	3	4	4	4	4	4	4	4	4	4	4	4
4	BICF2P745841	19616932	2	2	4	2	4	2	4	2	4	2	2	2	2	2	2	2	2	2	2	2
4	CHR4_19622417	19622417	2	4	2	4	2	2	2	2	2	2	2	4	4	4	4	4	4	4	4	4
4	CHR4_19626618	19626618	4	4	4	4	4	4	4	4	4	4	4	4	4	4	4	4	4	4	4	4
4	BICF2P758372	19634708	1	3	1	3	1	1	1	1	1	1	1	3	3	3	3	3	3	3	3	3
4	BICF2P739956	19665117	2	2	2	2	2	2	2	2	2	2	2	2	2	2	2	2	2	2	2	2
4	BICF2P559531	19677201	2	2	2	2	2	2	2	2	2	2	2	2	2	2	2	2	2	2	2	2
4	CHR4_19677437	19677437	2	2	2	2	2	2	2	2	2	2	2	2	2	2	2	2	2	2	2	2
4	CHR4_19683357	19683357	4	4	4	4	4	4	4	4	4	4	4	4	4	4	4	4	4	4	4	4
4	CHR4_19683382	19683382	2	2	2	2	2	2	2	2	2	2	2	2	2	2	2	2	2	2	2	2
4	BICF2P93451	19684006	2	2	2	2	2	2	2	2	2	2	2	2	2	2	2	2	2	2	2	2
4	CHR4_19695747	19695747	2	2	2	2	2	2	2	2	2	2	2	2	2	2	2	2	2	2	2	2
4	CHR4_19696515	19696515	2	4	2	4	2	2	2	2	2	2	2	4	4	4	4	4	4	4	4	4
4	CHR4_19696854	19696854	4	4	4	4	4	4	4	4	4	4	4	4	4	4	4	4	4	4	4	4
4	BICF2P737148	19701634	2	4	2	4	2	2	2	2	2	2	2	4	4	4	4	4	4	4	4	4
4	BICF2P336695	19705632	2	4	2	4	2	2	2	2	2	2	2	4	4	4	4	4	4	4	4	4
4	BICF2P628702	19729338	3	4	3	4	3	3	3	3	3	3	3	4	4	4	4	4	4	4	4	4
4	BICF2S23221958	19743791	4	3	3	3	4	3	4	3	4	3	4	3	3	3	3	3	3	3	3	3
4	CHR4_19768622	19768622	3	1	1	1	3	1	3	1	3	1	3	1	1	1	1	1	1	1	1	1
4	BICF2P1150029	19797668	4	2	2	2	4	2	4	2	4	2	4	2	2	2	2	2	2	2	2	2
4	BICF2P1455423	19827967	1	1	1	1	1	1	1	1	1	1	1	1	1	1	1	1	1	1	1	1
4	BICF2P1199943	19829923	1	1	1	1	1	1	1	1	1	1	1	1	1	1	1	1	1	1	1	1
4	BICF2S245827	19838895	3	3	3	3	3	3	3	3	3	3	3	3	3	3	3	3	3	3	3	3
4	CHR4_19839249	19839249	3	1	1	1	3	1	3	1	3	1	3	1	1	1	1	1	1	1	1	1
4	CHR4_19840215	19840215	4	1	1	1	4	1	4	1	4	1	4	1	1	1	1	1	1	1	1	1
4	BICF2P132873	19840412	2	2	2	2	2	2	2	2	2	2	2	2	2	2	2	2	2	2	2	2
4	BICF2P1070843	19852469	3	3	3	3	3	3	3	3	3	3	3	3	3	3	3	3	3	3	3	3
4	BICF2P790634	19867601	1	1	1	1	1	1	1	1	1	1	1	1	1	1	1	1	1	1	1	1
4	BICF2P836304	19885503	3	3	3	3	3	3	3	3	3	3	3	3	3	3	3	3	3	3	3	3
4	BICF2P996662	19892431	3	3	3	3	3	3	3	3	3	3	3	3	3	3	3	3	3	3	3	3
4	BICF2P1373805	19897889	3	2	3	2	3	3	3	3	3	3	3	2	2	2	2	2	2	2	2	2
4	BICF2P441125	19917647	0	0	0	0	0	0	0	0	0	0	0	0	0	0	0	0	0	0	0	0
4	BICF2S23759957	19921649	2	2	2	2	2	2	2	2	2	2	2	2	2	2	2	2	2	2	2	2
4	BICF2S23242445	19934921	4	3	3	3	4	3	4	3	4	3	4	3	3	3	3	3	3	3	3	3
4	CHR4_19948259	19948259	2	2	2	2	2	2	2	2	2	2	2	2	2	2	2	2	2	2	2	2
4	BICF2P1311413	19951090	1	1	1	1	1	1	1	1	1	1	1	1	1	1	1	1	1	1	1	1
4	CHR4_19953086	19953086	3	3	3	3	3	3	3	3	3	3	3	3	3	3	3	3	3	3	3	3
4	CHR4_19960680	19960680	3	4	4	4	3	4	3	4	3	4	3	4	4	4	4	4	4	4	4	4
4	CHR4_19983983	19983983	2	1	1	1	2	1	2	1	2	1	2	1	1	1	1	1	1	1	1	1
4	BICF2P624105	19986990	4	4	4	4	4	4	4	4	4	4	4	4	4	4	4	4	4	4	4	4
4	BICF2S2337243	19991867	1	1	1	1	1	1	1	1	1	1	1	1	1	1	1	1	1	1	1	1
4	CHR4_19995103	19995103	3	3	3	3	3	3	3	3	3	3	3	3	3	3	3	3	3	3	3	3
4	BICF2S2436504	20006618	1	1	3	1	3	1	3	1	3	1	1	1	1	1	1	1	1	1	1	1
4	BICF2P720481	20011943	4	4	4	4	4	4	4	4	4	4	4	4	4	4	4	4	4	4	4	4
4	BICF2P772745	20015862	3	3	1	3	1	3	1	3	1	3	3	3	3	3	3	3	3	3	3	3
4	BICF2S23645318	20044913	4	1	4	1	4	4	4	4	4	4	4	1	1	1	1	1	1	1	1	1
4	BICF2P35000	20048055	2	2	2	2	2	2	2	2	2	2	2	2	2	2	2	2	2	2	2	2
4	CHR4_20058347	20058347	2	2	2	2	2	2	2	2	2	2	2	2	2	2	2	2	2	2	2	2
4	CHR4_20058627	20058627	4	3	3	3	4	3	4	3	4	3	4	3	3	3	3	3	3	3	3	3
4	CHR4_20058881	20058881	3	3	3	3	3	3	3	3	3	3	3	3	3	3	3	3	3	3	3	3
4	CHR4_20059265	20059265	2	2	2	2	2	2	2	2	2	2	2	2	2	2	2	2	2	2	2	2
4	BICF2P1121568	20059438	3	1	1	1	3	1	3	1	3	1	3	1	1	1	1	1	1	1	1	1
4	BICF2P1121567	20059507	4	2	2	2	4	2	4	2	4	2	4	2	2	2	2	2	2	2	2	2
4	CHR4_20059865	20059865	2	2	2	2	2	2	2	2	2	2	2	2	2	2	2	2	2	2	2	2
4	CHR4_20060228	20060228	4	4	4	4	4	4	4	4	4	4	4	4	4	4	4	4	4	4	4	4
4	BICF2S23534545	20074489	3	3	3	3	3	3	3	3	3	3	3	3	3	3	3	3	3	3	3	3
4	BICF2P813340	20104633	3	3	3	3	3	3	3	3	3	3	3	3	3	3	3	3	3	3	3	3
4	BICF2P20363	20115944	3	1	3	1	3	3	3	3	3	3	3	1	1	1	1	1	1	1	1	1
4	BICF2P613296	20118561	1	1	1	1	1	1	1	1	1	1	1	1	1	1	0	0	1	1	1	1
4	BICF2P344626	20139203	1	1	1	1	1	1	1	1	1	1	1	1	1	1	1	1	1	1	1	1
4	CHR4_20139269	20139269	4	3	3	3	4	3	4	3	4	3	4	3	3	3	3	3	3	3	3	3
4	BICF2S23639274	20146169	1	1	1	1	1	1	1	1	1	1	1	1	1	1	1	1	1	1	1	1
4	BICF2P1424635	20161265	1	1	1	1	1	1	1	1	1	1	1	1	1	1	1	1	1	1	1	1
4	BICF2P68319	20164934	2	2	4	2	4	2	4	2	4	2	2	2	2	2	2	2	2	2	2	2
4	BICF2S235566	20178550	1	3	1	3	1	1	1	1	1	1	1	3	3	3	3	3	3	3	3	3
4	BICF2S235567	20178644	3	1	3	1	3	3	3	3	3	3	3	1	1	1	1	1	1	1	1	1
4	CHR4_20178953	20178953	4	3	3	3	4	3	4	3	4	3	4	3	3	3	3	3	3	3	3	3
4	BICF2P1223147	20195626	4	4	4	4	4	4	4	4	4	4	4	4	4	4	4	4	4	4	4	4
4	BICF2P402785	20211666	1	2	2	2	1	2	1	2	1	2	1	2	2	2	2	2	2	2	2	2
4	BICF2S23649361	20223642	1	1	1	1	1	1	1	1	1	1	1	1	1	1	1	1	1	1	1	1
4	BICF2S23425129	20255264	2	4	2	4	2	2	2	2	2	2	2	4	4	4	4	4	4	4	4	4
4	CHR4_20266227	20266227	2	2	2	2	2	2	2	2	2	2	2	2	2	2	2	2	2	2	2	2
4	CHR4_20287519	20287519	3	1	1	1	3	1	3	1	3	1	3	1	1	1	1	1	1	1	1	1
4	G277F54S156	20293946	2	2	2	2	2	2	2	2	2	2	2	2	2	2	2	2	2	2	2	2
4	G277F56S236	20294696	2	4	4	4	2	4	2	4	2	4	2	4	4	4	4	4	4	4	4	4
4	CHR4_20294785	20294785	3	3	3	3	3	3	3	3	3	3	3	3	3	3	3	3	3	3	3	3
4	CHR4_20296221	20296221	2	3	3	3	2	3	2	3	2	3	2	3	3	3	3	3	3	3	3	3
4	CHR4_20299781	20299781	4	4	4	4	4	4	4	4	4	4	4	4	4	4	4	4	4	4	4	4
4	CHR4_20310395	20310395	4	2	2	2	4	2	4	2	4	2	4	2	2	2	2	2	2	2	2	2
4	CHR4_20313842	20313842	2	4	4	4	2	4	2	4	2	4	2	4	4	4	4	4	4	4	4	4
4	CHR4_20322914	20322914	1	1	1	1	1	1	1	1	1	1	1	1	1	1	1	1	1	1	1	1
4	BICF2S23422668	20333477	1	1	1	1	1	1	1	1	1	1	1	1	1	1	1	1	1	1	1	1
4	BICF2P654801	20342807	2	2	2	2	2	2	2	2	2	2	2	2	2	2	2	2	2	2	2	2
4	BICF2S23435937	20365048	4	2	2	2	4	2	4	2	4	2	4	2	2	2	2	2	2	2	2	2
4	TIGRP2P59166_RS9211352	20372668	3	3	3	3	3	3	3	3	3	3	3	3	3	3	3	3	3	3	3	3
4	CHR4_20376590	20376590	1	1	1	1	1	1	1	1	1	1	1	1	1	1	1	1	1	1	1	1
4	CHR4_20378960	20378960	3	3	3	3	3	3	3	3	3	3	3	3	3	3	3	3	3	3	3	3
4	BICF2S23727834	20383959	1	3	3	3	1	3	1	3	1	3	1	3	3	3	3	3	3	3	3	3
4	BICF2P792152	20394690	3	3	3	3	3	3	3	3	3	3	3	3	3	3	3	3	3	3	3	3
4	BICF2P1115704	20407320	1	1	1	1	1	1	1	1	1	1	1	1	1	1	1	1	1	1	1	1
4	BICF2S23724992	20420270	3	3	3	3	3	3	3	3	3	3	3	3	3	3	3	3	3	3	3	3
4	BICF2P183294	20428204	4	4	4	4	4	4	4	4	4	4	4	4	4	4	4	4	4	4	4	4
4	BICF2S22962681	20450806	4	4	4	4	4	4	4	4	4	4	4	4	4	4	4	4	4	4	4	4
4	BICF2S23539428	20462297	1	3	3	3	1	3	1	3	1	3	1	3	3	3	3	3	3	3	3	3
4	G278F48S221	20494694	1	1	1	1	1	1	1	1	1	1	1	1	1	1	1	1	1	1	1	1
4	CHR4_20516291	20516291	3	3	3	3	3	3	3	3	3	3	3	3	3	3	3	3	3	3	3	3
4	CHR4_20516376	20516376	3	3	3	3	3	3	3	3	3	3	3	3	3	3	3	3	3	3	3	3
4	CHR4_20517177	20517177	4	4	4	4	4	4	4	4	4	4	4	4	4	4	4	4	4	4	4	4
4	BICF2S23333147	20517196	2	2	2	2	2	2	2	2	2	2	2	2	2	2	2	2	2	2	2	2
4	CHR4_20517549	20517549	1	1	1	1	1	1	1	1	1	1	1	1	1	1	1	1	1	1	1	1
4	CHR4_20518193	20518193	1	1	1	1	1	1	1	1	1	1	1	1	1	1	1	1	1	1	1	1
4	CHR4_20518635	20518635	3	1	1	1	3	1	3	1	3	1	3	1	1	1	1	1	1	1	1	1
4	CHR4_20518831	20518831	2	2	2	2	2	2	2	2	2	2	2	2	2	2	2	2	2	2	2	2
4	CHR4_20519050	20519050	3	3	3	3	3	3	3	3	3	3	3	3	3	3	3	3	3	3	3	3
4	CHR4_20519447	20519447	1	1	1	1	1	1	1	1	1	1	1	1	1	1	1	1	1	1	1	1
4	BICF2P1256396	20523707	1	3	1	3	1	1	1	1	1	1	1	3	3	3	3	3	3	3	3	3
4	BICF2P1386178	20533539	4	2	4	2	4	4	4	4	4	4	4	2	2	2	2	2	2	2	2	2
4	BICF2P26423	20546501	2	2	2	2	2	2	2	2	2	2	2	2	2	2	2	2	2	2	2	2
4	BICF2P1356480	20554700	4	3	3	3	4	3	4	3	4	3	4	3	3	3	3	3	3	3	3	3
4	BICF2P672920	20566485	4	4	4	4	4	4	4	4	4	4	4	4	4	4	4	4	4	4	4	4
4	BICF2P564352	20582624	2	2	2	2	2	2	2	2	2	2	2	2	2	2	2	2	2	2	2	2
4	CHR4_20596851	20596851	3	3	3	3	3	3	3	3	3	3	3	3	3	3	3	3	3	3	3	3
4	BICF2S23258523	20597940	1	1	1	1	1	1	1	1	1	1	1	1	1	1	1	1	1	1	1	1
4	BICF2P174895	20607654	1	1	3	1	3	1	3	1	3	1	1	1	1	1	1	1	1	1	1	1
4	CHR4_20607868	20607868	2	2	2	2	2	2	2	2	2	2	2	2	2	2	2	2	2	2	2	2
4	BICF2S23153304	20630405	3	4	3	4	3	3	3	3	3	3	3	4	4	4	4	4	4	4	4	4
4	BICF2P417406	20644186	2	2	2	2	2	2	2	2	2	2	2	2	2	2	2	2	2	2	2	2
4	BICF2S23759857	20654039	3	1	3	1	3	3	3	3	3	3	3	1	1	1	1	1	1	1	1	1
4	CHR4_20657360	20657360	2	2	2	2	2	2	2	2	2	2	2	2	2	2	2	2	2	2	2	2
4	BICF2P974564	20662133	3	3	3	3	3	3	3	3	3	3	3	3	3	3	3	3	3	3	3	3
4	TIGRP2P59171_RS9127486	20684515	3	3	3	3	3	3	3	3	3	3	3	3	3	3	3	3	3	3	3	3
4	BICF2P412231	20696638	3	3	3	3	3	3	3	3	3	3	3	3	3	3	3	3	3	3	3	3
4	BICF2S23450247	20705453	4	2	2	2	4	2	4	2	4	2	4	2	2	2	2	2	2	2	2	2
4	BICF2P564636	20721211	4	4	4	4	4	4	4	4	4	4	4	4	4	4	4	4	4	4	4	4
4	BICF2P247641	20726636	3	3	3	3	3	3	3	3	3	3	3	3	3	3	3	3	3	3	3	3
4	BICF2P1206495	20747074	2	2	2	2	2	2	2	2	2	2	2	2	2	2	2	2	2	2	2	2
4	BICF2P187052	20756367	3	3	3	3	3	3	3	3	3	3	3	3	3	3	3	3	3	3	3	3
4	TIGRP2P59172_RS8990583	20763768	1	1	1	1	1	1	1	1	1	1	1	1	1	1	1	1	1	1	1	1
4	BICF2S23427582	20777938	2	2	2	2	2	2	2	2	2	2	2	2	2	2	2	2	2	2	2	2
4	BICF2P390280	20787803	1	3	3	3	1	3	1	3	1	3	1	3	3	3	3	3	3	3	3	3
4	BICF2S23026475	20795025	1	1	1	1	1	1	1	1	1	1	1	1	1	1	1	1	1	1	1	1
4	BICF2S2315984	20811043	1	2	2	2	1	2	1	2	1	2	1	2	2	2	2	2	2	2	2	2
4	BICF2P1087592	20820812	4	4	4	4	4	4	4	4	4	4	4	4	4	4	4	4	4	4	4	4
4	BICF2P95705	20846087	2	2	2	2	2	2	2	2	2	2	2	2	2	2	2	2	2	2	2	2
4	BICF2P750308	20856623	1	1	1	1	1	1	1	1	1	1	1	1	1	1	1	1	1	1	1	1
4	BICF2S22925114	20870047	4	4	4	4	4	4	4	4	4	4	4	4	4	4	4	4	4	4	4	4
4	BICF2S2296870	20874025	2	2	2	2	2	2	2	2	2	2	2	2	2	2	2	2	2	2	2	2
4	BICF2P857499	20875730	4	4	4	4	4	4	4	4	4	4	4	4	4	4	4	4	4	4	4	4
4	BICF2P857500	20875997	1	1	1	1	1	1	1	1	1	1	1	1	1	1	1	1	1	1	1	1
4	BICF2P1093948	20889872	3	3	3	3	3	3	3	3	3	3	3	3	3	3	3	3	3	3	3	3
4	BICF2P879822	20901129	2	2	2	2	2	2	2	2	2	2	2	2	2	2	2	2	2	2	2	2
4	BICF2P298806	20925505	1	1	1	1	1	1	1	1	1	1	1	1	1	1	1	1	1	1	1	1
4	BICF2S23435514	20939382	4	4	4	4	4	4	4	4	4	4	4	4	4	4	4	4	4	4	4	4
4	BICF2S23535284	20947145	1	1	1	1	1	1	1	1	1	1	1	1	1	1	1	1	1	1	1	1
4	BICF2P1199455	20957875	2	2	2	2	2	2	2	2	2	2	2	2	2	2	2	2	2	2	2	2
4	BICF2P1052007	20968186	2	2	2	2	2	2	2	2	2	2	2	2	2	2	2	2	2	2	2	2
4	BICF2P1347174	20976740	4	4	4	4	4	4	4	4	4	4	4	4	4	4	4	4	4	4	4	4
4	BICF2P957960	20991033	3	3	3	3	3	3	3	3	3	3	3	3	3	3	3	3	3	3	3	3
4	BICF2P661482	21015250	4	4	4	4	4	4	4	4	4	4	4	4	4	4	4	4	4	4	4	4
4	BICF2S23354586	21031348	3	3	3	3	3	3	3	3	3	3	3	3	3	3	3	3	3	3	3	3
4	BICF2P1262253	21034738	3	3	3	3	3	3	3	3	3	3	3	3	3	3	3	3	3	3	3	3
4	BICF2S23423452	21054336	1	1	1	1	1	1	1	1	1	1	1	1	1	1	1	1	1	1	1	1
4	BICF2P602587	21059517	2	4	2	4	2	2	2	2	2	2	2	4	4	4	4	4	4	4	4	4
4	BICF2S23353840	21074923	2	2	2	2	2	2	2	2	2	2	2	2	2	2	2	2	2	2	2	2
4	BICF2S23654569	21086108	4	4	4	4	4	4	4	4	4	4	4	4	4	4	4	4	4	4	4	4
4	CHR4_21089456	21089456	2	2	2	2	2	2	2	2	2	2	2	2	2	2	2	2	2	2	2	2
4	BICF2S23447982	21094745	3	3	3	3	3	3	3	3	3	3	3	3	3	3	3	3	3	3	3	3
4	BICF2P1362992	21098029	3	3	3	3	3	3	3	3	3	3	3	3	3	3	3	3	3	3	3	3
4	BICF2P369714	21105143	2	2	2	2	2	2	2	2	2	2	2	2	2	2	2	2	2	2	2	2
4	CHR4_21107016	21107016	1	1	1	1	1	1	1	1	1	1	1	1	1	1	1	1	1	1	1	1
4	CHR4_21107206	21107206	3	3	3	3	3	3	3	3	3	3	3	3	3	3	3	3	3	3	3	3
4	CHR4_21107592	21107592	1	1	1	1	1	1	1	1	1	1	1	1	1	1	1	1	1	1	1	1
4	CHR4_21108006	21108006	2	2	2	2	2	2	2	2	2	2	2	2	2	2	2	2	2	2	2	2
4	CHR4_21108063	21108063	1	1	1	1	1	1	1	1	1	1	1	1	1	1	1	1	1	1	1	1
4	CHR4_21108400	21108400	1	1	1	1	1	1	1	1	1	1	1	1	1	1	1	1	1	1	1	1
4	CHR4_21108644	21108644	4	4	4	4	4	4	4	4	4	4	4	4	4	4	4	4	4	4	4	4
4	CHR4_21108929	21108929	2	2	2	2	2	2	2	2	2	2	2	2	2	2	2	2	2	2	2	2
4	CHR4_21109943	21109943	4	4	4	4	4	4	4	4	4	4	4	4	4	4	4	4	4	4	4	4
4	CHR4_21110987	21110987	4	4	4	4	4	4	4	4	4	4	4	4	4	4	4	4	4	4	4	4
4	CHR4_21114647	21114647	2	2	2	2	2	2	2	2	2	2	2	2	2	2	2	2	2	2	2	2
4	BICF2P483722	21132082	1	3	0	0	1	1	1	1	1	1	1	3	3	3	3	3	3	3	3	3
4	BICF2P1386470	21146513	2	2	2	2	2	2	2	2	2	2	2	2	2	2	2	2	2	2	2	2
4	BICF2P1092832	21155041	1	1	1	1	1	1	1	1	1	1	1	1	1	1	1	1	1	1	1	1
4	BICF2P620494	21163281	2	2	2	2	2	2	2	2	2	2	2	2	2	2	2	2	2	2	2	2
4	BICF2P180502	21179912	2	4	2	4	2	2	2	2	2	2	2	4	4	4	4	4	4	4	4	4
4	BICF2P470978	21182788	2	2	2	2	2	2	2	2	2	2	2	2	2	2	2	2	2	2	2	2
4	CHR4_21197843	21197843	2	4	2	4	2	2	2	2	2	2	2	4	4	4	4	4	4	4	4	4
4	CHR4_21198008	21198008	1	3	1	3	1	1	1	1	1	1	1	3	3	3	3	3	3	3	3	3
4	CHR4_21198389	21198389	1	3	1	3	1	1	1	1	1	1	1	3	3	3	3	3	3	3	3	3
4	BICF2P227732	21199590	4	4	4	4	4	4	4	4	4	4	4	4	4	4	4	4	4	4	4	4
4	CHR4_21200180	21200180	3	3	3	3	3	3	3	3	3	3	3	3	3	3	3	3	3	3	3	3
4	CHR4_21202800	21202800	3	3	3	3	3	3	3	3	3	3	3	3	3	3	3	3	3	3	3	3
4	BICF2S23553075	21209327	2	4	2	4	2	2	2	2	2	2	2	4	4	4	4	4	4	4	4	4
4	BICF2P677748	21218279	3	3	3	3	3	3	3	3	3	3	3	3	3	3	3	3	3	3	3	3
4	BICF2P338570	21229047	3	3	3	3	3	3	3	3	3	3	3	3	3	3	3	3	3	3	3	3
4	BICF2P1172080	21246697	4	4	4	4	4	4	4	4	4	4	4	4	4	4	4	4	4	4	4	4
4	BICF2P57664	21254728	2	2	2	2	2	2	2	2	2	2	2	2	2	2	2	2	2	2	2	2
4	BICF2P1057002	21267774	1	1	1	1	1	1	1	1	1	1	1	1	1	1	1	1	1	1	1	1
4	BICF2P1227310	21273082	4	2	4	2	4	4	4	4	4	4	4	2	2	2	2	2	2	2	2	2
4	BICF2P1227313	21273763	2	4	2	4	2	2	2	2	2	2	2	4	4	4	4	4	4	4	4	4
4	BICF2S23547067	21295561	4	4	4	4	4	4	4	4	4	4	4	4	4	4	4	4	4	4	4	4
4	BICF2P1100678	21305213	3	3	3	3	3	3	3	3	3	3	3	3	3	3	3	3	3	3	3	3
4	CHR4_21306496	21306496	2	2	2	2	2	2	2	2	2	2	2	2	2	2	2	2	2	2	2	2
4	BICF2S23536896	21315588	4	4	4	4	4	4	4	4	4	4	4	4	4	4	4	4	4	4	4	4
4	BICF2P561315	21321076	4	2	4	2	4	4	4	4	4	4	4	2	2	2	2	2	2	2	2	2
4	BICF2P1130715	21335581	4	2	4	2	4	4	4	4	4	4	4	2	2	2	2	2	2	2	2	2
4	BICF2S23135389	21344561	4	4	4	4	4	4	4	4	4	4	4	4	4	4	4	4	4	4	4	4
4	BICF2S23311281	21360686	2	2	2	2	2	2	2	2	2	2	2	2	2	2	2	2	2	2	2	2
4	CHR4_21366910	21366910	3	3	3	3	3	3	3	3	3	3	3	3	3	3	3	3	3	3	3	3
4	CHR4_21367107	21367107	3	3	3	3	3	3	3	3	3	3	3	3	3	3	3	3	3	3	3	3
4	CHR4_21367135	21367135	4	2	4	2	4	4	4	4	4	4	4	2	2	2	2	2	2	2	2	2
4	BICF2S23214018	21369464	3	3	3	3	3	3	3	3	3	3	3	3	3	3	3	3	3	3	3	3
4	CHR4_21369622	21369622	1	1	1	1	1	1	1	1	1	1	1	1	1	1	1	1	1	1	1	1
4	BICF2S23424303	21372819	2	2	2	2	2	2	2	2	2	2	2	2	2	2	2	2	2	2	2	2
4	BICF2P224931	21384431	0	0	0	0	0	0	0	0	0	0	0	0	0	0	0	0	0	0	0	0
4	BICF2P1230977	21393483	3	3	3	3	3	3	3	3	3	3	3	3	3	3	3	3	3	3	3	3
4	BICF2P644497	21405516	3	1	3	1	3	3	3	3	3	3	3	1	1	1	1	1	1	1	1	1
4	BICF2P306349	21414680	3	3	3	3	3	3	3	3	3	3	3	3	3	3	3	3	3	3	3	3
4	BICF2P877878	21429935	4	4	4	4	4	4	4	4	4	4	4	4	4	4	4	4	4	4	4	4
4	BICF2P883969	21443374	2	2	2	2	2	2	2	2	2	2	2	2	2	2	2	2	2	2	2	2
4	CHR4_21448709	21448709	1	3	1	3	1	1	1	1	1	1	1	3	3	3	3	3	3	3	3	3
4	CHR4_21451395	21451395	2	2	2	2	2	2	2	2	2	2	2	2	2	2	2	2	2	2	2	2
4	BICF2P614061	21452336	3	1	3	1	3	3	3	3	3	3	3	1	1	1	1	1	1	1	1	1
4	CHR4_21457682	21457682	3	3	3	3	3	3	3	3	3	3	3	3	3	3	3	3	3	3	3	3
4	CHR4_21459154	21459154	3	3	3	3	3	3	3	3	3	3	3	3	3	3	3	3	3	3	3	3
4	BICF2P746746	21466388	4	3	4	3	4	4	4	4	4	4	4	3	3	3	3	3	3	3	3	3
4	CHR4_21477283	21477283	2	2	2	2	2	2	2	2	2	2	2	2	2	2	2	2	2	2	2	2
4	CHR4_21479909	21479909	4	2	4	2	4	4	4	4	4	4	4	2	2	2	2	2	2	2	2	2
4	BICF2P1205168	21480328	3	3	3	3	3	3	3	3	3	3	3	3	3	3	3	3	3	3	3	3
4	CHR4_21480509	21480509	2	2	2	2	2	2	2	2	2	2	2	2	2	2	2	2	2	2	2	2
4	BICF2P942951	21481061	2	2	2	2	2	2	2	2	2	2	2	2	2	2	2	2	2	2	2	2
4	BICF2P840137	21484755	4	4	4	4	4	4	4	4	4	4	4	4	4	4	4	4	4	4	4	4
4	CHR4_21498209	21498209	2	2	2	2	2	2	2	2	2	2	2	2	2	2	2	2	2	2	2	2
4	CHR4_21498724	21498724	4	4	4	4	4	4	4	4	4	4	4	4	4	4	4	4	4	4	4	4
4	CHR4_21502391	21502391	2	2	2	2	2	2	2	2	2	2	2	2	2	2	2	2	2	2	2	2
[truncated: 6,187 more rows]
